# Supplementary material for: Quantitative proteome analysis of Merkel cell carcinoma cell lines using SILAC
Source: Clin Proteomics. 2019 Dec 19;16:42. doi: 10.1186/s12014-019-9263-z (PMC6921584; doi:10.1186/s12014-019-9263-z)
Supplement: Supplementary file 2 — Additional file 2: Table S1. Shows overlapping and specific proteins for each cell line. [file 12014_2019_9263_MOESM2_ESM.xls]

## Sheet: HaCaT
Table S1 shows overlapping and specific proteins for each cell line.
Row	Accession	Protein	MW [kDa]	pI	Scores
1	H2B1C_HUMAN	Histone H2B type 1-C/E/F/G/I OS=Homo sapiens GN=HIST1H2BC PE=1 SV=4	13.9	10.8	921.2 (M:921.2)
2	H2B1H_HUMAN	Histone H2B type 1-H OS=Homo sapiens GN=HIST1H2BH PE=1 SV=3	13.9	10.8	921.1 (M:921.1)
3	H2BFS_HUMAN	Histone H2B type F-S OS=Homo sapiens GN=H2BFS PE=1 SV=2	13.9	10.8	857.7 (M:857.7)
4	H2B2E_HUMAN	Histone H2B type 2-E OS=Homo sapiens GN=HIST2H2BE PE=1 SV=3	13.9	10.8	812.3 (M:812.3)
5	H12_HUMAN	Histone H1.2 OS=Homo sapiens GN=HIST1H1C PE=1 SV=2	21.4	11.4	793.7 (M:793.7)
6	H14_HUMAN	Histone H1.4 OS=Homo sapiens GN=HIST1H1E PE=1 SV=2	21.9	11.5	786.1 (M:786.1)
7	ROA2_HUMAN	Heterogeneous nuclear ribonucleoproteins A2/B1 OS=Homo sapiens GN=HNRNPA2B1 PE=1 SV=2	37.4	9.3	738.5 (M:738.5)
8	LMNA_HUMAN	Prelamin-A/C OS=Homo sapiens GN=LMNA PE=1 SV=1	74.1	6.6	716.0 (M:716.0)
9	H15_HUMAN	Histone H1.5 OS=Homo sapiens GN=HIST1H1B PE=1 SV=3	22.6	11.4	649.8 (M:649.8)
10	K2C7_HUMAN	Keratin, type II cytoskeletal 7 OS=Homo sapiens GN=KRT7 PE=1 SV=5	51.4	5.3	548.8 (M:548.8)
11	K1C14_HUMAN	Keratin, type I cytoskeletal 14 OS=Homo sapiens GN=KRT14 PE=1 SV=4	51.5	4.9	517.8 (M:517.8)
12	K2C8_HUMAN	Keratin, type II cytoskeletal 8 OS=Homo sapiens GN=KRT8 PE=1 SV=7	53.7	5.4	500.4 (M:500.4)
13	H4_HUMAN	Histone H4 OS=Homo sapiens GN=HIST1H4A PE=1 SV=2	11.4	11.8	488.3 (M:488.3)
14	ROA1_HUMAN	Heterogeneous nuclear ribonucleoprotein A1 OS=Homo sapiens GN=HNRNPA1 PE=1 SV=5	38.7	9.6	477.0 (M:477.0)
15	HSPB1_HUMAN	Heat shock protein beta-1 OS=Homo sapiens GN=HSPB1 PE=1 SV=2	22.8	6.0	463.4 (M:463.4)
16	K2C5_HUMAN	Keratin, type II cytoskeletal 5 OS=Homo sapiens GN=KRT5 PE=1 SV=3	62.3	8.6	462.2 (M:462.2)
17	PDLI1_HUMAN	PDZ and LIM domain protein 1 OS=Homo sapiens GN=PDLIM1 PE=1 SV=4	36.0	6.6	421.7 (M:421.7)
18	K1C19_HUMAN	Keratin, type I cytoskeletal 19 OS=Homo sapiens GN=KRT19 PE=1 SV=4	44.1	4.9	419.3 (M:419.3)
19	ANXA2_HUMAN	Annexin A2 OS=Homo sapiens GN=ANXA2 PE=1 SV=2	38.6	8.5	375.0 (M:375.0)
20	H2A1H_HUMAN	Histone H2A type 1-H OS=Homo sapiens GN=HIST1H2AH PE=1 SV=3	13.9	11.3	359.7 (M:359.7)
21	K1C17_HUMAN	Keratin, type I cytoskeletal 17 OS=Homo sapiens GN=KRT17 PE=1 SV=2	48.1	4.8	338.4 (M:338.4)
22	ACTB_HUMAN	Actin, cytoplasmic 1 OS=Homo sapiens GN=ACTB PE=1 SV=1	41.7	5.2	333.2 (M:333.2)
23	H2A1C_HUMAN	Histone H2A type 1-C OS=Homo sapiens GN=HIST1H2AC PE=1 SV=3	14.1	11.5	315.7 (M:315.7)
24	ATPA_HUMAN	ATP synthase subunit alpha, mitochondrial OS=Homo sapiens GN=ATP5A1 PE=1 SV=1	59.7	9.6	313.6 (M:313.6)
25	K2C6A_HUMAN	Keratin, type II cytoskeletal 6A OS=Homo sapiens GN=KRT6A PE=1 SV=3	60.0	8.9	312.0 (M:312.0)
26	FLNA_HUMAN	Filamin-A OS=Homo sapiens GN=FLNA PE=1 SV=4	280.6	5.7	281.2 (M:281.2)
27	K1C15_HUMAN	Keratin, type I cytoskeletal 15 OS=Homo sapiens GN=KRT15 PE=1 SV=3	49.2	4.6	280.5 (M:280.5)
28	FLNB_HUMAN	Filamin-B OS=Homo sapiens GN=FLNB PE=1 SV=2	278.0	5.4	247.8 (M:247.8)
29	PPIA_HUMAN	Peptidyl-prolyl cis-trans isomerase A OS=Homo sapiens GN=PPIA PE=1 SV=2	18.0	9.0	245.0 (M:245.0)
30	GRP75_HUMAN	Stress-70 protein, mitochondrial OS=Homo sapiens GN=HSPA9 PE=1 SV=2	73.6	5.8	244.5 (M:244.5)
31	HNRPK_HUMAN	Heterogeneous nuclear ribonucleoprotein K OS=Homo sapiens GN=HNRNPK PE=1 SV=1	50.9	5.3	243.5 (M:243.5)
32	PRDX6_HUMAN	Peroxiredoxin-6 OS=Homo sapiens GN=PRDX6 PE=1 SV=3	25.0	6.0	232.7 (M:232.7)
33	ANXA1_HUMAN	Annexin A1 OS=Homo sapiens GN=ANXA1 PE=1 SV=2	38.7	6.7	231.4 (M:231.4)
34	NPM_HUMAN	Nucleophosmin OS=Homo sapiens GN=NPM1 PE=1 SV=2	32.6	4.5	229.4 (M:229.4)
35	H3C_HUMAN	Histone H3.3C OS=Homo sapiens GN=H3F3C PE=1 SV=3	15.2	11.9	219.7 (M:219.7)
36	H2A2B_HUMAN	Histone H2A type 2-B OS=Homo sapiens GN=HIST2H2AB PE=1 SV=3	14.0	11.3	204.8 (M:204.8)
37	HNRPD_HUMAN	Heterogeneous nuclear ribonucleoprotein D0 OS=Homo sapiens GN=HNRNPD PE=1 SV=1	38.4	8.5	191.5 (M:191.5)
38	PRDX5_HUMAN	Peroxiredoxin-5, mitochondrial OS=Homo sapiens GN=PRDX5 PE=1 SV=4	22.1	9.9	189.5 (M:189.5)
39	RS25_HUMAN	40S ribosomal protein S25 OS=Homo sapiens GN=RPS25 PE=1 SV=1	13.7	10.6	175.0 (M:175.0)
40	KPYM_HUMAN	Pyruvate kinase PKM OS=Homo sapiens GN=PKM PE=1 SV=4	57.9	9.0	163.1 (M:163.1)
41	CH10_HUMAN	10 kDa heat shock protein, mitochondrial OS=Homo sapiens GN=HSPE1 PE=1 SV=2	10.9	9.4	152.8 (M:152.8)
42	RL8_HUMAN	60S ribosomal protein L8 OS=Homo sapiens GN=RPL8 PE=1 SV=2	28.0	11.9	152.2 (M:152.2)
43	K1C13_HUMAN	Keratin, type I cytoskeletal 13 OS=Homo sapiens GN=KRT13 PE=1 SV=4	49.6	4.8	151.3 (M:151.3)
44	ENOA_HUMAN	Alpha-enolase OS=Homo sapiens GN=ENO1 PE=1 SV=2	47.1	7.7	150.8 (M:150.8)
45	S10AB_HUMAN	Protein S100-A11 OS=Homo sapiens GN=S100A11 PE=1 SV=2	11.7	7.5	149.5 (M:149.5)
46	FUBP2_HUMAN	Far upstream element-binding protein 2 OS=Homo sapiens GN=KHSRP PE=1 SV=4	73.1	7.0	147.7 (M:147.7)
47	TPIS_HUMAN	Triosephosphate isomerase OS=Homo sapiens GN=TPI1 PE=1 SV=3	30.8	5.6	147.4 (M:147.4)
48	ROA3_HUMAN	Heterogeneous nuclear ribonucleoprotein A3 OS=Homo sapiens GN=HNRNPA3 PE=1 SV=2	39.6	9.6	145.6 (M:145.6)
49	RL12_HUMAN	60S ribosomal protein L12 OS=Homo sapiens GN=RPL12 PE=1 SV=1	17.8	10.3	145.5 (M:145.5)
50	RS19_HUMAN	40S ribosomal protein S19 OS=Homo sapiens GN=RPS19 PE=1 SV=2	16.1	10.7	143.2 (M:143.2)
51	HNRPM_HUMAN	Heterogeneous nuclear ribonucleoprotein M OS=Homo sapiens GN=HNRNPM PE=1 SV=3	77.5	9.6	138.8 (M:138.8)
52	PDIA3_HUMAN	Protein disulfide-isomerase A3 OS=Homo sapiens GN=PDIA3 PE=1 SV=4	56.7	5.9	136.7 (M:136.7)
53	SFPQ_HUMAN	Splicing factor, proline- and glutamine-rich OS=Homo sapiens GN=SFPQ PE=1 SV=2	76.1	9.9	135.6 (M:135.6)
54	RL31_HUMAN	60S ribosomal protein L31 OS=Homo sapiens GN=RPL31 PE=1 SV=1	14.5	11.0	134.1 (M:134.1)
55	RL29_HUMAN	60S ribosomal protein L29 OS=Homo sapiens GN=RPL29 PE=1 SV=2	17.7	12.3	133.8 (M:133.8)
56	G3P_HUMAN	Glyceraldehyde-3-phosphate dehydrogenase OS=Homo sapiens GN=GAPDH PE=1 SV=3	36.0	9.3	132.3 (M:132.3)
57	HSP7C_HUMAN	Heat shock cognate 71 kDa protein OS=Homo sapiens GN=HSPA8 PE=1 SV=1	70.9	5.2	127.7 (M:127.7)
58	PAIRB_HUMAN	Plasminogen activator inhibitor 1 RNA-binding protein OS=Homo sapiens GN=SERBP1 PE=1 SV=2	44.9	9.3	126.8 (M:126.8)
59	PRDX2_HUMAN	Peroxiredoxin-2 OS=Homo sapiens GN=PRDX2 PE=1 SV=5	21.9	5.6	125.8 (M:125.8)
60	SRSF3_HUMAN	Serine/arginine-rich splicing factor 3 OS=Homo sapiens GN=SRSF3 PE=1 SV=1	19.3	12.3	125.5 (M:125.5)
61	STIP1_HUMAN	Stress-induced-phosphoprotein 1 OS=Homo sapiens GN=STIP1 PE=1 SV=1	62.6	6.4	124.3 (M:124.3)
62	HNRDL_HUMAN	Heterogeneous nuclear ribonucleoprotein D-like OS=Homo sapiens GN=HNRNPDL PE=1 SV=3	46.4	10.0	123.5 (M:123.5)
63	ICAL_HUMAN	Calpastatin OS=Homo sapiens GN=CAST PE=1 SV=4	76.5	4.8	123.2 (M:123.2)
64	1433S_HUMAN	14-3-3 protein sigma OS=Homo sapiens GN=SFN PE=1 SV=1	27.8	4.5	122.9 (M:122.9)
65	RLA2_HUMAN	60S acidic ribosomal protein P2 OS=Homo sapiens GN=RPLP2 PE=1 SV=1	11.7	4.2	120.0 (M:120.0)
66	HNRPU_HUMAN	Heterogeneous nuclear ribonucleoprotein U OS=Homo sapiens GN=HNRNPU PE=1 SV=6	90.5	5.7	111.7 (M:111.7)
67	RL13_HUMAN	60S ribosomal protein L13 OS=Homo sapiens GN=RPL13 PE=1 SV=4	24.2	12.2	110.5 (M:110.5)
68	MARCS_HUMAN	Myristoylated alanine-rich C-kinase substrate OS=Homo sapiens GN=MARCKS PE=1 SV=4	31.5	4.3	108.6 (M:108.6)
69	GRP78_HUMAN	78 kDa glucose-regulated protein OS=Homo sapiens GN=HSPA5 PE=1 SV=2	72.3	4.9	107.6 (M:107.6)
70	RS28_HUMAN	40S ribosomal protein S28 OS=Homo sapiens GN=RPS28 PE=1 SV=1	7.8	11.6	103.4 (M:103.4)
71	EZRI_HUMAN	Ezrin OS=Homo sapiens GN=EZR PE=1 SV=4	69.4	5.9	102.3 (M:102.3)
72	LIMA1_HUMAN	LIM domain and actin-binding protein 1 OS=Homo sapiens GN=LIMA1 PE=1 SV=1	85.2	6.4	100.0 (M:100.0)
73	SRSF1_HUMAN	Serine/arginine-rich splicing factor 1 OS=Homo sapiens GN=SRSF1 PE=1 SV=2	27.7	10.8	99.5 (M:99.5)
74	1433Z_HUMAN	14-3-3 protein zeta/delta OS=Homo sapiens GN=YWHAZ PE=1 SV=1	27.7	4.6	96.0 (M:96.0)
75	RS5_HUMAN	40S ribosomal protein S5 OS=Homo sapiens GN=RPS5 PE=1 SV=4	22.9	10.4	95.8 (M:95.8)
76	RL23A_HUMAN	60S ribosomal protein L23a OS=Homo sapiens GN=RPL23A PE=1 SV=1	17.7	10.9	95.4 (M:95.4)
77	RL30_HUMAN	60S ribosomal protein L30 OS=Homo sapiens GN=RPL30 PE=1 SV=2	12.8	10.2	94.0 (M:94.0)
78	LAP2B_HUMAN	Lamina-associated polypeptide 2, isoforms beta/gamma OS=Homo sapiens GN=TMPO PE=1 SV=2	50.6	9.8	93.7 (M:93.7)
79	PDIA1_HUMAN	Protein disulfide-isomerase OS=Homo sapiens GN=P4HB PE=1 SV=3	57.1	4.6	93.1 (M:93.1)
80	RL18_HUMAN	60S ribosomal protein L18 OS=Homo sapiens GN=RPL18 PE=1 SV=2	21.6	12.3	92.9 (M:92.9)
81	RS12_HUMAN	40S ribosomal protein S12 OS=Homo sapiens GN=RPS12 PE=1 SV=3	14.5	7.7	90.9 (M:90.9)
82	TIF1B_HUMAN	Transcription intermediary factor 1-beta OS=Homo sapiens GN=TRIM28 PE=1 SV=5	88.5	5.4	90.7 (M:90.7)
83	EF1A1_HUMAN	Elongation factor 1-alpha 1 OS=Homo sapiens GN=EEF1A1 PE=1 SV=1	50.1	9.7	90.4 (M:90.4)
84	ALBU_HUMAN	Serum albumin OS=Homo sapiens GN=ALB PE=1 SV=2	69.3	5.9	88.3 (M:88.3)
85	ACTN1_HUMAN	Alpha-actinin-1 OS=Homo sapiens GN=ACTN1 PE=1 SV=2	103.0	5.1	87.0 (M:87.0)
86	PLIN3_HUMAN	Perilipin-3 OS=Homo sapiens GN=PLIN3 PE=1 SV=3	47.0	5.2	83.8 (M:83.8)
87	COF1_HUMAN	Cofilin-1 OS=Homo sapiens GN=CFL1 PE=1 SV=3	18.5	9.1	82.1 (M:82.1)
88	TRI29_HUMAN	Tripartite motif-containing protein 29 OS=Homo sapiens GN=TRIM29 PE=1 SV=2	65.8	6.8	80.8 (M:80.8)
89	SERPH_HUMAN	Serpin H1 OS=Homo sapiens GN=SERPINH1 PE=1 SV=2	46.4	9.3	79.9 (M:79.9)
90	IF4H_HUMAN	Eukaryotic translation initiation factor 4H OS=Homo sapiens GN=EIF4H PE=1 SV=5	27.4	7.5	79.6 (M:79.6)
91	BID_HUMAN	BH3-interacting domain death agonist OS=Homo sapiens GN=BID PE=1 SV=1	22.0	5.1	78.6 (M:78.6)
92	RMXL1_HUMAN	RNA binding motif protein, X-linked-like-1 OS=Homo sapiens GN=RBMXL1 PE=1 SV=1	42.1	0.0	78.1 (M:78.1)
93	G3BP1_HUMAN	Ras GTPase-activating protein-binding protein 1 OS=Homo sapiens GN=G3BP1 PE=1 SV=1	52.1	5.3	77.2 (M:77.2)
94	S10AE_HUMAN	Protein S100-A14 OS=Homo sapiens GN=S100A14 PE=1 SV=1	11.7	5.0	72.3 (M:72.3)
95	VASP_HUMAN	Vasodilator-stimulated phosphoprotein OS=Homo sapiens GN=VASP PE=1 SV=3	39.8	9.7	71.8 (M:71.8)
96	SRP14_HUMAN	Signal recognition particle 14 kDa protein OS=Homo sapiens GN=SRP14 PE=1 SV=2	14.6	10.6	68.9 (M:68.9)
97	CH60_HUMAN	60 kDa heat shock protein, mitochondrial OS=Homo sapiens GN=HSPD1 PE=1 SV=2	61.0	5.6	67.5 (M:67.5)
98	YBOX1_HUMAN	Nuclease-sensitive element-binding protein 1 OS=Homo sapiens GN=YBX1 PE=1 SV=3	35.9	0.0	66.8 (M:66.8)
99	TPM3_HUMAN	Tropomyosin alpha-3 chain OS=Homo sapiens GN=TPM3 PE=1 SV=2	32.9	4.5	66.2 (M:66.2)
100	PAP1M_HUMAN	Polyadenylate-binding protein 1-like 2 OS=Homo sapiens GN=PABPC1L2A PE=2 SV=1	22.8	9.8	65.4 (M:65.4)
101	ALDOA_HUMAN	Fructose-bisphosphate aldolase A OS=Homo sapiens GN=ALDOA PE=1 SV=2	39.4	9.2	65.1 (M:65.1)
102	SRS10_HUMAN	Serine/arginine-rich splicing factor 10 OS=Homo sapiens GN=SRSF10 PE=1 SV=1	31.3	11.8	64.9 (M:64.9)
103	RL19_HUMAN	60S ribosomal protein L19 OS=Homo sapiens GN=RPL19 PE=1 SV=1	23.5	12.1	63.7 (M:63.7)
104	HBB_HUMAN	Hemoglobin subunit beta OS=Homo sapiens GN=HBB PE=1 SV=2	16.0	6.9	62.2 (M:62.2)
105	RL22_HUMAN	60S ribosomal protein L22 OS=Homo sapiens GN=RPL22 PE=1 SV=2	14.8	9.7	61.5 (M:61.5)
106	PTBP1_HUMAN	Polypyrimidine tract-binding protein 1 OS=Homo sapiens GN=PTBP1 PE=1 SV=1	57.2	9.8	61.3 (M:61.3)
107	MOES_HUMAN	Moesin OS=Homo sapiens GN=MSN PE=1 SV=3	67.8	6.0	59.0 (M:59.0)
108	MIF_HUMAN	Macrophage migration inhibitory factor OS=Homo sapiens GN=MIF PE=1 SV=4	12.5	9.1	58.5 (M:58.5)
109	YBOX3_HUMAN	Y-box-binding protein 3 OS=Homo sapiens GN=YBX3 PE=1 SV=4	40.1	10.1	58.3 (M:58.3)
110	NEDD8_HUMAN	NEDD8 OS=Homo sapiens GN=NEDD8 PE=1 SV=1	9.1	9.1	57.5 (M:57.5)
111	IPYR_HUMAN	Inorganic pyrophosphatase OS=Homo sapiens GN=PPA1 PE=1 SV=2	32.6	5.5	56.7 (M:56.7)
112	RL6_HUMAN	60S ribosomal protein L6 OS=Homo sapiens GN=RPL6 PE=1 SV=3	32.7	11.1	56.7 (M:56.7)
113	NOLC1_HUMAN	Nucleolar and coiled-body phosphoprotein 1 OS=Homo sapiens GN=NOLC1 PE=1 SV=2	73.6	10.0	56.3 (M:56.3)
114	BAG3_HUMAN	BAG family molecular chaperone regulator 3 OS=Homo sapiens GN=BAG3 PE=1 SV=3	61.6	6.5	56.2 (M:56.2)
115	PTRF_HUMAN	Polymerase I and transcript release factor OS=Homo sapiens GN=PTRF PE=1 SV=1	43.4	5.4	56.1 (M:56.1)
116	NSF1C_HUMAN	NSFL1 cofactor p47 OS=Homo sapiens GN=NSFL1C PE=1 SV=2	40.5	4.9	55.8 (M:55.8)
117	TBA1C_HUMAN	Tubulin alpha-1C chain OS=Homo sapiens GN=TUBA1C PE=1 SV=1	49.9	4.8	55.2 (M:55.2)
118	PSME1_HUMAN	Proteasome activator complex subunit 1 OS=Homo sapiens GN=PSME1 PE=1 SV=1	28.7	5.7	55.0 (M:55.0)
119	LAMP1_HUMAN	Lysosome-associated membrane glycoprotein 1 OS=Homo sapiens GN=LAMP1 PE=1 SV=3	44.9	9.9	54.1 (M:54.1)
120	NUCL_HUMAN	Nucleolin OS=Homo sapiens GN=NCL PE=1 SV=3	76.6	4.4	53.8 (M:53.8)
121	THOC4_HUMAN	THO complex subunit 4 OS=Homo sapiens GN=ALYREF PE=1 SV=3	26.9	11.6	53.3 (M:53.3)
122	INVO_HUMAN	Involucrin OS=Homo sapiens GN=IVL PE=1 SV=2	68.4	4.5	53.1 (M:53.1)
123	FUBP3_HUMAN	Far upstream element-binding protein 3 OS=Homo sapiens GN=FUBP3 PE=1 SV=2	61.6	9.4	52.9 (M:52.9)
124	ITA6_HUMAN	Integrin alpha-6 OS=Homo sapiens GN=ITGA6 PE=1 SV=5	126.5	6.2	51.2 (M:51.2)
125	RS24_HUMAN	40S ribosomal protein S24 OS=Homo sapiens GN=RPS24 PE=1 SV=1	15.4	11.3	50.2 (M:50.2)
126	EF2_HUMAN	Elongation factor 2 OS=Homo sapiens GN=EEF2 PE=1 SV=4	95.3	6.4	49.2 (M:49.2)
127	THIO_HUMAN	Thioredoxin OS=Homo sapiens GN=TXN PE=1 SV=3	11.7	4.7	48.9 (M:48.9)
128	PA1B2_HUMAN	Platelet-activating factor acetylhydrolase IB subunit beta OS=Homo sapiens GN=PAFAH1B2 PE=1 SV=1	25.6	5.5	48.7 (M:48.7)
129	H2AY_HUMAN	Core histone macro-H2A.1 OS=Homo sapiens GN=H2AFY PE=1 SV=4	39.6	10.3	48.1 (M:48.1)
130	RS29_HUMAN	40S ribosomal protein S29 OS=Homo sapiens GN=RPS29 PE=1 SV=2	6.7	11.8	47.6 (M:47.6)
131	RS7_HUMAN	40S ribosomal protein S7 OS=Homo sapiens GN=RPS7 PE=1 SV=1	22.1	10.6	46.9 (M:46.9)
132	HNRPC_HUMAN	Heterogeneous nuclear ribonucleoproteins C1/C2 OS=Homo sapiens GN=HNRNPC PE=1 SV=4	33.6	4.8	45.8 (M:45.8)
133	HMGN2_HUMAN	Non-histone chromosomal protein HMG-17 OS=Homo sapiens GN=HMGN2 PE=1 SV=3	9.4	10.5	43.6 (M:43.6)
134	SRSF5_HUMAN	Serine/arginine-rich splicing factor 5 OS=Homo sapiens GN=SRSF5 PE=1 SV=1	31.2	12.2	43.5 (M:43.5)
135	FA63B_HUMAN	Protein FAM63B OS=Homo sapiens GN=FAM63B PE=1 SV=2	67.1	4.3	43.4 (M:43.4)
136	RL3_HUMAN	60S ribosomal protein L3 OS=Homo sapiens GN=RPL3 PE=1 SV=2	46.1	10.8	42.9 (M:42.9)
137	K1C18_HUMAN	Keratin, type I cytoskeletal 18 OS=Homo sapiens GN=KRT18 PE=1 SV=2	48.0	5.2	42.1 (M:42.1)
138	RS3_HUMAN	40S ribosomal protein S3 OS=Homo sapiens GN=RPS3 PE=1 SV=2	26.7	10.3	41.9 (M:41.9)
139	KAD2_HUMAN	Adenylate kinase 2, mitochondrial OS=Homo sapiens GN=AK2 PE=1 SV=2	26.5	8.9	41.5 (M:41.5)
140	H10_HUMAN	Histone H1.0 OS=Homo sapiens GN=H1F0 PE=1 SV=3	20.9	11.3	41.3 (M:41.3)
141	TPD54_HUMAN	Tumor protein D54 OS=Homo sapiens GN=TPD52L2 PE=1 SV=2	22.2	5.1	40.9 (M:40.9)
142	TRI13_HUMAN	E3 ubiquitin-protein ligase TRIM13 OS=Homo sapiens GN=TRIM13 PE=1 SV=2	47.0	5.7	40.2 (M:40.2)
143	RL7A_HUMAN	60S ribosomal protein L7a OS=Homo sapiens GN=RPL7A PE=1 SV=2	30.0	11.3	40.2 (M:40.2)
144	NDK8_HUMAN	Putative nucleoside diphosphate kinase OS=Homo sapiens GN=NME2P1 PE=5 SV=1	15.5	9.6	40.0 (M:40.0)
145	HGB1A_HUMAN	Putative high mobility group protein B1-like 1 OS=Homo sapiens GN=HMGB1P1 PE=5 SV=1	24.2	5.9	40.0 (M:40.0)
146	VINC_HUMAN	Vinculin OS=Homo sapiens GN=VCL PE=1 SV=4	123.7	5.4	38.9 (M:38.9)
147	TRFL_HUMAN	Lactotransferrin OS=Homo sapiens GN=LTF PE=1 SV=6	78.1	9.6	38.8 (M:38.8)
148	IL18_HUMAN	Interleukin-18 OS=Homo sapiens GN=IL18 PE=1 SV=1	22.3	4.4	37.5 (M:37.5)
149	SRSF2_HUMAN	Serine/arginine-rich splicing factor 2 OS=Homo sapiens GN=SRSF2 PE=1 SV=4	25.5	12.4	36.9 (M:36.9)
150	RS17_HUMAN	40S ribosomal protein S17 OS=Homo sapiens GN=RPS17 PE=1 SV=2	15.5	10.4	36.4 (M:36.4)
151	RL36_HUMAN	60S ribosomal protein L36 OS=Homo sapiens GN=RPL36 PE=1 SV=3	12.2	12.2	36.4 (M:36.4)
152	ERCC6_HUMAN	DNA excision repair protein ERCC-6 OS=Homo sapiens GN=ERCC6 PE=1 SV=1	168.3	9.0	35.8 (M:35.8)
153	SRRM2_HUMAN	Serine/arginine repetitive matrix protein 2 OS=Homo sapiens GN=SRRM2 PE=1 SV=2	299.4	12.6	35.5 (M:35.5)
154	MDHM_HUMAN	Malate dehydrogenase, mitochondrial OS=Homo sapiens GN=MDH2 PE=1 SV=3	35.5	9.8	35.4 (M:35.4)
155	NHRF1_HUMAN	Na(+)/H(+) exchange regulatory cofactor NHE-RF1 OS=Homo sapiens GN=SLC9A3R1 PE=1 SV=4	38.8	5.5	35.1 (M:35.1)
156	ZDBF2_HUMAN	DBF4-type zinc finger-containing protein 2 OS=Homo sapiens GN=ZDBF2 PE=1 SV=3	265.5	5.7	34.6 (M:34.6)
157	TACD2_HUMAN	Tumor-associated calcium signal transducer 2 OS=Homo sapiens GN=TACSTD2 PE=1 SV=3	35.7	10.2	34.5 (M:34.5)
158	LUZP1_HUMAN	Leucine zipper protein 1 OS=Homo sapiens GN=LUZP1 PE=1 SV=2	120.2	9.4	34.5 (M:34.5)
159	EGFR_HUMAN	Epidermal growth factor receptor OS=Homo sapiens GN=EGFR PE=1 SV=2	134.2	6.3	34.2 (M:34.2)
160	OFUT1_HUMAN	GDP-fucose protein O-fucosyltransferase 1 OS=Homo sapiens GN=POFUT1 PE=1 SV=1	43.9	9.5	33.6 (M:33.6)
161	OLIG1_HUMAN	Oligodendrocyte transcription factor 1 OS=Homo sapiens GN=OLIG1 PE=1 SV=2	27.9	10.5	32.3 (M:32.3)
162	HBA_HUMAN	Hemoglobin subunit alpha OS=Homo sapiens GN=HBA1 PE=1 SV=2	15.2	9.4	31.8 (M:31.8)
163	PCBP1_HUMAN	Poly(rC)-binding protein 1 OS=Homo sapiens GN=PCBP1 PE=1 SV=2	37.5	6.8	30.5 (M:30.5)
164	PARK7_HUMAN	Protein deglycase DJ-1 OS=Homo sapiens GN=PARK7 PE=1 SV=2	19.9	6.4	30.5 (M:30.5)
165	RS30_HUMAN	40S ribosomal protein S30 OS=Homo sapiens GN=FAU PE=1 SV=1	6.6	12.6	30.3 (M:30.3)
166	CBX3_HUMAN	Chromobox protein homolog 3 OS=Homo sapiens GN=CBX3 PE=1 SV=4	20.8	5.1	30.0 (M:30.0)
167	SNX4_HUMAN	Sorting nexin-4 OS=Homo sapiens GN=SNX4 PE=1 SV=1	51.9	5.6	30.0 (M:30.0)
168	SNR27_HUMAN	U4/U6.U5 small nuclear ribonucleoprotein 27 kDa protein OS=Homo sapiens GN=SNRNP27 PE=1 SV=1	18.8	12.1	29.4 (M:29.4)
169	MYH9_HUMAN	Myosin-9 OS=Homo sapiens GN=MYH9 PE=1 SV=4	226.4	5.4	29.0 (M:29.0)
170	S10AG_HUMAN	Protein S100-A16 OS=Homo sapiens GN=S100A16 PE=1 SV=1	11.8	6.4	29.0 (M:29.0)
171	MOS_HUMAN	Proto-oncogene serine/threonine-protein kinase mos OS=Homo sapiens GN=MOS PE=1 SV=1	37.8	10.1	28.8 (M:28.8)
172	ATP5H_HUMAN	ATP synthase subunit d, mitochondrial OS=Homo sapiens GN=ATP5H PE=1 SV=3	18.5	5.1	28.8 (M:28.8)
173	TCRGL_HUMAN	Transcription elongation regulator 1-like protein OS=Homo sapiens GN=TCERG1L PE=2 SV=2	65.6	10.5	27.6 (M:27.6)
174	RL26_HUMAN	60S ribosomal protein L26 OS=Homo sapiens GN=RPL26 PE=1 SV=1	17.2	11.0	26.8 (M:26.8)
175	RLA1_HUMAN	60S acidic ribosomal protein P1 OS=Homo sapiens GN=RPLP1 PE=1 SV=1	11.5	4.0	26.8 (M:26.8)
176	AKTIP_HUMAN	AKT-interacting protein OS=Homo sapiens GN=AKTIP PE=1 SV=1	33.1	9.8	26.7 (M:26.7)
177	HP1B3_HUMAN	Heterochromatin protein 1-binding protein 3 OS=Homo sapiens GN=HP1BP3 PE=1 SV=1	61.2	10.2	26.3 (M:26.3)
178	NONO_HUMAN	Non-POU domain-containing octamer-binding protein OS=Homo sapiens GN=NONO PE=1 SV=4	54.2	9.6	26.1 (M:26.1)
179	ZN318_HUMAN	Zinc finger protein 318 OS=Homo sapiens GN=ZNF318 PE=1 SV=2	251.0	6.8	25.3 (M:25.3)
180	RS14_HUMAN	40S ribosomal protein S14 OS=Homo sapiens GN=RPS14 PE=1 SV=3	16.3	10.9	24.5 (M:24.5)
181	RS20_HUMAN	40S ribosomal protein S20 OS=Homo sapiens GN=RPS20 PE=1 SV=1	13.4	10.7	23.4 (M:23.4)
182	LEG7_HUMAN	Galectin-7 OS=Homo sapiens GN=LGALS7 PE=1 SV=2	15.1	8.0	22.9 (M:22.9)
183	PALM_HUMAN	Paralemmin-1 OS=Homo sapiens GN=PALM PE=1 SV=2	42.1	4.8	22.6 (M:22.6)
184	LMNB1_HUMAN	Lamin-B1 OS=Homo sapiens GN=LMNB1 PE=1 SV=2	66.4	5.0	22.4 (M:22.4)
185	TSNA1_HUMAN	t-SNARE domain-containing protein 1 OS=Homo sapiens GN=TSNARE1 PE=1 SV=2	55.9	10.2	21.9 (M:21.9)
186	CQ047_HUMAN	Uncharacterized protein C17orf47 OS=Homo sapiens GN=C17orf47 PE=2 SV=3	63.1	9.9	21.9 (M:21.9)
187	SF3B2_HUMAN	Splicing factor 3B subunit 2 OS=Homo sapiens GN=SF3B2 PE=1 SV=2	100.2	5.4	21.7 (M:21.7)
188	PLSI_HUMAN	Plastin-1 OS=Homo sapiens GN=PLS1 PE=1 SV=2	70.2	5.2	21.5 (M:21.5)
189	SPTN1_HUMAN	Spectrin alpha chain, non-erythrocytic 1 OS=Homo sapiens GN=SPTAN1 PE=1 SV=3	284.4	5.1	20.9 (M:20.9)
190	ELMD1_HUMAN	ELMO domain-containing protein 1 OS=Homo sapiens GN=ELMOD1 PE=2 SV=3	39.0	9.6	20.9 (M:20.9)
191	FA64A_HUMAN	Protein FAM64A OS=Homo sapiens GN=FAM64A PE=1 SV=1	27.5	11.0	20.6 (M:20.6)
192	SAP_HUMAN	Prosaposin OS=Homo sapiens GN=PSAP PE=1 SV=2	58.1	4.9	20.6 (M:20.6)
193	41_HUMAN	Protein 4.1 OS=Homo sapiens GN=EPB41 PE=1 SV=4	97.0	5.3	20.5 (M:20.5)
194	CNTP4_HUMAN	Contactin-associated protein-like 4 OS=Homo sapiens GN=CNTNAP4 PE=1 SV=3	145.2	6.2	20.2 (M:20.2)
195	CI163_HUMAN	Uncharacterized protein C9orf163 OS=Homo sapiens GN=C9orf163 PE=2 SV=1	22.1	12.9	20.1 (M:20.1)
196	NFASC_HUMAN	Neurofascin OS=Homo sapiens GN=NFASC PE=1 SV=4	149.9	6.2	20.0 (M:20.0)
197	DGKQ_HUMAN	Diacylglycerol kinase theta OS=Homo sapiens GN=DGKQ PE=1 SV=2	101.1	8.1	19.8 (M:19.8)
198	T151A_HUMAN	Transmembrane protein 151A OS=Homo sapiens GN=TMEM151A PE=2 SV=1	51.2	9.3	19.7 (M:19.7)
199	ZN397_HUMAN	Zinc finger protein 397 OS=Homo sapiens GN=ZNF397 PE=1 SV=2	61.1	7.1	19.6 (M:19.6)
200	GLRX3_HUMAN	Glutaredoxin-3 OS=Homo sapiens GN=GLRX3 PE=1 SV=2	37.4	5.2	19.5 (M:19.5)
201	T10IP_HUMAN	Testis-specific protein 10-interacting protein OS=Homo sapiens GN=TSGA10IP PE=1 SV=2	62.3	10.1	19.3 (M:19.3)
202	FBXW7_HUMAN	F-box/WD repeat-containing protein 7 OS=Homo sapiens GN=FBXW7 PE=1 SV=1	79.6	5.4	19.2 (M:19.2)
203	WLS_HUMAN	Protein wntless homolog OS=Homo sapiens GN=WLS PE=1 SV=2	62.2	7.2	19.2 (M:19.2)
204	SYNC_HUMAN	Asparagine--tRNA ligase, cytoplasmic OS=Homo sapiens GN=NARS PE=1 SV=1	62.9	5.9	19.1 (M:19.1)
205	LAT4_HUMAN	Large neutral amino acids transporter small subunit 4 OS=Homo sapiens GN=SLC43A2 PE=1 SV=1	62.7	9.3	19.0 (M:19.0)
206	PROF1_HUMAN	Profilin-1 OS=Homo sapiens GN=PFN1 PE=1 SV=2	15.0	9.4	18.7 (M:18.7)
207	RL37_HUMAN	60S ribosomal protein L37 OS=Homo sapiens GN=RPL37 PE=1 SV=2	11.1	12.7	18.7 (M:18.7)
208	T150B_HUMAN	Transmembrane protein 150B OS=Homo sapiens GN=TMEM150B PE=2 SV=1	25.7	9.1	18.6 (M:18.6)
209	RS16_HUMAN	40S ribosomal protein S16 OS=Homo sapiens GN=RPS16 PE=1 SV=2	16.4	10.8	18.5 (M:18.5)
210	CATIN_HUMAN	Cactin OS=Homo sapiens GN=CACTIN PE=1 SV=3	88.6	9.6	18.4 (M:18.4)
211	NALP4_HUMAN	NACHT, LRR and PYD domains-containing protein 4 OS=Homo sapiens GN=NLRP4 PE=1 SV=3	113.3	5.5	18.4 (M:18.4)
212	R3HD2_HUMAN	R3H domain-containing protein 2 OS=Homo sapiens GN=R3HDM2 PE=1 SV=3	106.9	9.6	18.2 (M:18.2)
213	TUSC1_HUMAN	Tumor suppressor candidate gene 1 protein OS=Homo sapiens GN=TUSC1 PE=1 SV=3	23.4	11.8	18.1 (M:18.1)
214	SF01_HUMAN	Splicing factor 1 OS=Homo sapiens GN=SF1 PE=1 SV=4	68.3	9.7	18.0 (M:18.0)
215	RNF25_HUMAN	E3 ubiquitin-protein ligase RNF25 OS=Homo sapiens GN=RNF25 PE=1 SV=1	51.2	6.1	17.8 (M:17.8)
216	ACOXL_HUMAN	Acyl-coenzyme A oxidase-like protein OS=Homo sapiens GN=ACOXL PE=2 SV=3	61.8	9.5	17.7 (M:17.7)
217	TEX11_HUMAN	Testis-expressed sequence 11 protein OS=Homo sapiens GN=TEX11 PE=1 SV=3	107.8	4.9	17.5 (M:17.5)
218	AP1G2_HUMAN	AP-1 complex subunit gamma-like 2 OS=Homo sapiens GN=AP1G2 PE=1 SV=1	87.1	6.1	17.5 (M:17.5)
219	NED4L_HUMAN	E3 ubiquitin-protein ligase NEDD4-like OS=Homo sapiens GN=NEDD4L PE=1 SV=2	111.9	5.5	17.5 (M:17.5)
220	PGAP1_HUMAN	GPI inositol-deacylase OS=Homo sapiens GN=PGAP1 PE=1 SV=1	105.3	9.7	17.4 (M:17.4)
221	OPRD_HUMAN	Delta-type opioid receptor OS=Homo sapiens GN=OPRD1 PE=1 SV=4	40.3	10.3	17.4 (M:17.4)
222	CXXC1_HUMAN	CXXC-type zinc finger protein 1 OS=Homo sapiens GN=CXXC1 PE=1 SV=2	75.7	9.8	17.4 (M:17.4)
223	PCMD2_HUMAN	Protein-L-isoaspartate O-methyltransferase domain-containing protein 2 OS=Homo sapiens GN=PCMTD2 PE=2 SV=2	41.0	5.7	17.2 (M:17.2)
224	FA83B_HUMAN	Protein FAM83B OS=Homo sapiens GN=FAM83B PE=1 SV=1	114.7	9.6	17.2 (M:17.2)
225	MYPC2_HUMAN	Myosin-binding protein C, fast-type OS=Homo sapiens GN=MYBPC2 PE=1 SV=2	128.0	8.2	17.2 (M:17.2)
226	CA112_HUMAN	Uncharacterized protein C1orf112 OS=Homo sapiens GN=C1orf112 PE=1 SV=1	96.5	5.6	17.0 (M:17.0)
227	SCAR5_HUMAN	Scavenger receptor class A member 5 OS=Homo sapiens GN=SCARA5 PE=2 SV=1	54.0	6.7	16.9 (M:16.9)
228	CCD70_HUMAN	Coiled-coil domain-containing protein 70 OS=Homo sapiens GN=CCDC70 PE=1 SV=1	28.7	5.6	16.9 (M:16.9)
229	NSF_HUMAN	Vesicle-fusing ATPase OS=Homo sapiens GN=NSF PE=1 SV=3	82.5	6.6	16.8 (M:16.8)
230	NCOA6_HUMAN	Nuclear receptor coactivator 6 OS=Homo sapiens GN=NCOA6 PE=1 SV=3	219.0	10.0	16.5 (M:16.5)
231	SC23B_HUMAN	Protein transport protein Sec23B OS=Homo sapiens GN=SEC23B PE=1 SV=2	86.4	6.5	16.5 (M:16.5)
232	CSCL2_HUMAN	CSC1-like protein 2 OS=Homo sapiens GN=TMEM63B PE=1 SV=1	94.9	7.8	16.4 (M:16.4)
233	TOPZ1_HUMAN	Testis- and ovary-specific PAZ domain-containing protein 1 OS=Homo sapiens GN=TOPAZ1 PE=2 SV=3	190.8	9.1	16.4 (M:16.4)
234	PKD1_HUMAN	Polycystin-1 OS=Homo sapiens GN=PKD1 PE=1 SV=3	462.2	6.3	16.4 (M:16.4)
235	PRPF3_HUMAN	U4/U6 small nuclear ribonucleoprotein Prp3 OS=Homo sapiens GN=PRPF3 PE=1 SV=2	77.5	10.0	16.4 (M:16.4)
236	RT05_HUMAN	28S ribosomal protein S5, mitochondrial OS=Homo sapiens GN=MRPS5 PE=1 SV=2	48.0	10.7	16.3 (M:16.3)
237	RBM46_HUMAN	Probable RNA-binding protein 46 OS=Homo sapiens GN=RBM46 PE=2 SV=1	60.0	8.5	16.3 (M:16.3)
238	FXR2_HUMAN	Fragile X mental retardation syndrome-related protein 2 OS=Homo sapiens GN=FXR2 PE=1 SV=2	74.2	5.9	16.3 (M:16.3)
239	DNLI3_HUMAN	DNA ligase 3 OS=Homo sapiens GN=LIG3 PE=1 SV=2	112.8	10.0	16.2 (M:16.2)
240	S35F4_HUMAN	Solute carrier family 35 member F4 OS=Homo sapiens GN=SLC35F4 PE=2 SV=2	57.8	9.9	16.2 (M:16.2)
241	ELF2_HUMAN	ETS-related transcription factor Elf-2 OS=Homo sapiens GN=ELF2 PE=1 SV=2	63.9	6.1	16.1 (M:16.1)
242	ANGL6_HUMAN	Angiopoietin-related protein 6 OS=Homo sapiens GN=ANGPTL6 PE=1 SV=1	51.7	9.6	16.0 (M:16.0)
243	ITPR2_HUMAN	Inositol 1,4,5-trisphosphate receptor type 2 OS=Homo sapiens GN=ITPR2 PE=1 SV=2	307.9	6.0	15.9 (M:15.9)
244	CEP83_HUMAN	Centrosomal protein of 83 kDa OS=Homo sapiens GN=CEP83 PE=1 SV=2	82.0	5.9	15.9 (M:15.9)
245	SH321_HUMAN	SH3 domain-containing protein 21 OS=Homo sapiens GN=SH3D21 PE=2 SV=2	70.5	5.5	15.9 (M:15.9)
246	YP023_HUMAN	Putative uncharacterized protein FLJ34945 OS=Homo sapiens PE=2 SV=1	14.2	12.6	15.9 (M:15.9)
247	WWC2_HUMAN	Protein WWC2 OS=Homo sapiens GN=WWC2 PE=1 SV=2	133.8	5.3	15.9 (M:15.9)
248	TCPH_HUMAN	T-complex protein 1 subunit eta OS=Homo sapiens GN=CCT7 PE=1 SV=2	59.3	8.6	15.8 (M:15.8)
249	PAN3_HUMAN	PAB-dependent poly(A)-specific ribonuclease subunit PAN3 OS=Homo sapiens GN=PAN3 PE=1 SV=3	95.6	9.5	15.8 (M:15.8)
250	ARAP3_HUMAN	Arf-GAP with Rho-GAP domain, ANK repeat and PH domain-containing protein 3 OS=Homo sapiens GN=ARAP3 PE=1 SV=1	169.7	6.7	15.8 (M:15.8)
251	TTI1_HUMAN	TELO2-interacting protein 1 homolog OS=Homo sapiens GN=TTI1 PE=1 SV=3	122.0	5.6	15.7 (M:15.7)
252	SSFA2_HUMAN	Sperm-specific antigen 2 OS=Homo sapiens GN=SSFA2 PE=1 SV=3	138.3	5.0	15.7 (M:15.7)
253	ITM2B_HUMAN	Integral membrane protein 2B OS=Homo sapiens GN=ITM2B PE=1 SV=1	30.3	4.9	15.7 (M:15.7)
254	TBCD1_HUMAN	TBC1 domain family member 1 OS=Homo sapiens GN=TBC1D1 PE=1 SV=2	133.0	6.5	15.7 (M:15.7)
255	MFRN1_HUMAN	Mitoferrin-1 OS=Homo sapiens GN=SLC25A37 PE=2 SV=2	37.3	9.8	15.5 (M:15.5)
256	TGT_HUMAN	Queuine tRNA-ribosyltransferase OS=Homo sapiens GN=QTRT1 PE=1 SV=3	44.0	7.0	15.4 (M:15.4)
257	TNF14_HUMAN	Tumor necrosis factor ligand superfamily member 14 OS=Homo sapiens GN=TNFSF14 PE=1 SV=2	26.3	9.8	15.4 (M:15.4)
258	ZN788_HUMAN	Zinc finger protein 788 OS=Homo sapiens GN=ZNF788 PE=2 SV=2	71.9	10.6	15.4 (M:15.4)
259	TAF4_HUMAN	Transcription initiation factor TFIID subunit 4 OS=Homo sapiens GN=TAF4 PE=1 SV=2	110.0	10.6	15.3 (M:15.3)
260	NUP85_HUMAN	Nuclear pore complex protein Nup85 OS=Homo sapiens GN=NUP85 PE=1 SV=1	75.0	5.3	15.2 (M:15.2)
261	LRRT3_HUMAN	Leucine-rich repeat transmembrane neuronal protein 3 OS=Homo sapiens GN=LRRTM3 PE=2 SV=2	65.9	10.1	15.2 (M:15.2)
262	ZFYV9_HUMAN	Zinc finger FYVE domain-containing protein 9 OS=Homo sapiens GN=ZFYVE9 PE=1 SV=2	156.3	4.7	15.1 (M:15.1)
263	ASCC2_HUMAN	Activating signal cointegrator 1 complex subunit 2 OS=Homo sapiens GN=ASCC2 PE=1 SV=3	86.3	4.9	15.1 (M:15.1)
264	AT11C_HUMAN	Phospholipid-transporting ATPase IG OS=Homo sapiens GN=ATP11C PE=1 SV=3	129.4	6.2	15.0 (M:15.0)
265	DND1_HUMAN	Dead end protein homolog 1 OS=Homo sapiens GN=DND1 PE=1 SV=1	38.7	10.7	15.0 (M:15.0)

## Sheet: BroLi
Row	Accession	Protein	MW [kDa]	pI	Scores
1	H2B1M_HUMAN	Histone H2B type 1-M OS=Homo sapiens GN=HIST1H2BM PE=1 SV=3	14.0	10.8	429.9 (M:429.9)
2	H15_HUMAN	Histone H1.5 OS=Homo sapiens GN=HIST1H1B PE=1 SV=3	22.6	11.4	382.6 (M:382.6)
3	H2BFS_HUMAN	Histone H2B type F-S OS=Homo sapiens GN=H2BFS PE=1 SV=2	13.9	10.8	369.5 (M:369.5)
4	H14_HUMAN	Histone H1.4 OS=Homo sapiens GN=HIST1H1E PE=1 SV=2	21.9	11.5	351.1 (M:351.1)
5	H4_HUMAN	Histone H4 OS=Homo sapiens GN=HIST1H4A PE=1 SV=2	11.4	11.8	214.6 (M:214.6)
6	ALBU_HUMAN	Serum albumin OS=Homo sapiens GN=ALB PE=1 SV=2	69.3	5.9	181.2 (M:181.2)
7	H2A1H_HUMAN	Histone H2A type 1-H OS=Homo sapiens GN=HIST1H2AH PE=1 SV=3	13.9	11.3	177.7 (M:177.7)
8	H2A1C_HUMAN	Histone H2A type 1-C OS=Homo sapiens GN=HIST1H2AC PE=1 SV=3	14.1	11.5	166.8 (M:166.8)
9	H3C_HUMAN	Histone H3.3C OS=Homo sapiens GN=H3F3C PE=1 SV=3	15.2	11.9	126.0 (M:126.0)
10	H2A2B_HUMAN	Histone H2A type 2-B OS=Homo sapiens GN=HIST2H2AB PE=1 SV=3	14.0	11.3	111.9 (M:111.9)
11	CH10_HUMAN	10 kDa heat shock protein, mitochondrial OS=Homo sapiens GN=HSPE1 PE=1 SV=2	10.9	9.4	89.5 (M:89.5)
12	HBB_HUMAN	Hemoglobin subunit beta OS=Homo sapiens GN=HBB PE=1 SV=2	16.0	6.9	66.5 (M:66.5)
13	GRP75_HUMAN	Stress-70 protein, mitochondrial OS=Homo sapiens GN=HSPA9 PE=1 SV=2	73.6	5.8	66.1 (M:66.1)
14	THOC4_HUMAN	THO complex subunit 4 OS=Homo sapiens GN=ALYREF PE=1 SV=3	26.9	11.6	58.7 (M:58.7)
15	SFPQ_HUMAN	Splicing factor, proline- and glutamine-rich OS=Homo sapiens GN=SFPQ PE=1 SV=2	76.1	9.9	53.5 (M:53.5)
16	SRSF3_HUMAN	Serine/arginine-rich splicing factor 3 OS=Homo sapiens GN=SRSF3 PE=1 SV=1	19.3	12.3	53.3 (M:53.3)
17	HMGN2_HUMAN	Non-histone chromosomal protein HMG-17 OS=Homo sapiens GN=HMGN2 PE=1 SV=3	9.4	10.5	49.7 (M:49.7)
18	TRFL_HUMAN	Lactotransferrin OS=Homo sapiens GN=LTF PE=1 SV=6	78.1	9.6	48.6 (M:48.6)
19	STMN1_HUMAN	Stathmin OS=Homo sapiens GN=STMN1 PE=1 SV=3	17.3	5.7	48.3 (M:48.3)
20	PRDX2_HUMAN	Peroxiredoxin-2 OS=Homo sapiens GN=PRDX2 PE=1 SV=5	21.9	5.6	46.2 (M:46.2)
21	SRSF2_HUMAN	Serine/arginine-rich splicing factor 2 OS=Homo sapiens GN=SRSF2 PE=1 SV=4	25.5	12.4	44.8 (M:44.8)
22	SRSF1_HUMAN	Serine/arginine-rich splicing factor 1 OS=Homo sapiens GN=SRSF1 PE=1 SV=2	27.7	10.8	42.4 (M:42.4)
23	ITIH2_HUMAN	Inter-alpha-trypsin inhibitor heavy chain H2 OS=Homo sapiens GN=ITIH2 PE=1 SV=2	106.4	6.4	41.3 (M:41.3)
24	SRS10_HUMAN	Serine/arginine-rich splicing factor 10 OS=Homo sapiens GN=SRSF10 PE=1 SV=1	31.3	11.8	40.2 (M:40.2)
25	SRSF5_HUMAN	Serine/arginine-rich splicing factor 5 OS=Homo sapiens GN=SRSF5 PE=1 SV=1	31.2	12.2	39.8 (M:39.8)
26	ACOXL_HUMAN	Acyl-coenzyme A oxidase-like protein OS=Homo sapiens GN=ACOXL PE=2 SV=3	61.8	9.5	39.6 (M:39.6)
27	ATPA_HUMAN	ATP synthase subunit alpha, mitochondrial OS=Homo sapiens GN=ATP5A1 PE=1 SV=1	59.7	9.6	39.3 (M:39.3)
28	ACTB_HUMAN	Actin, cytoplasmic 1 OS=Homo sapiens GN=ACTB PE=1 SV=1	41.7	5.2	37.1 (M:37.1)
29	LUZP1_HUMAN	Leucine zipper protein 1 OS=Homo sapiens GN=LUZP1 PE=1 SV=2	120.2	9.4	36.7 (M:36.7)
30	HSPB1_HUMAN	Heat shock protein beta-1 OS=Homo sapiens GN=HSPB1 PE=1 SV=2	22.8	6.0	33.6 (M:33.6)
31	YP023_HUMAN	Putative uncharacterized protein FLJ34945 OS=Homo sapiens PE=2 SV=1	14.2	12.6	32.8 (M:32.8)
32	IBP2_HUMAN	Insulin-like growth factor-binding protein 2 OS=Homo sapiens GN=IGFBP2 PE=1 SV=2	34.8	8.9	32.7 (M:32.7)
33	DPY30_HUMAN	Protein dpy-30 homolog OS=Homo sapiens GN=DPY30 PE=1 SV=1	11.2	4.7	32.3 (M:32.3)
34	LSM8_HUMAN	U6 snRNA-associated Sm-like protein LSm8 OS=Homo sapiens GN=LSM8 PE=1 SV=3	10.4	4.2	31.9 (M:31.9)
35	H10_HUMAN	Histone H1.0 OS=Homo sapiens GN=H1F0 PE=1 SV=3	20.9	11.3	31.0 (M:31.0)
36	LMNB1_HUMAN	Lamin-B1 OS=Homo sapiens GN=LMNB1 PE=1 SV=2	66.4	5.0	30.0 (M:30.0)
37	HBA_HUMAN	Hemoglobin subunit alpha OS=Homo sapiens GN=HBA1 PE=1 SV=2	15.2	9.4	29.9 (M:29.9)
38	CHST7_HUMAN	Carbohydrate sulfotransferase 7 OS=Homo sapiens GN=CHST7 PE=1 SV=2	54.2	10.7	29.0 (M:29.0)
39	ROA1_HUMAN	Heterogeneous nuclear ribonucleoprotein A1 OS=Homo sapiens GN=HNRNPA1 PE=1 SV=5	38.7	9.6	28.6 (M:28.6)
40	CH60_HUMAN	60 kDa heat shock protein, mitochondrial OS=Homo sapiens GN=HSPD1 PE=1 SV=2	61.0	5.6	28.3 (M:28.3)
41	OLIG1_HUMAN	Oligodendrocyte transcription factor 1 OS=Homo sapiens GN=OLIG1 PE=1 SV=2	27.9	10.5	27.3 (M:27.3)
42	CQ047_HUMAN	Uncharacterized protein C17orf47 OS=Homo sapiens GN=C17orf47 PE=2 SV=3	63.1	9.9	27.1 (M:27.1)
43	RS12_HUMAN	40S ribosomal protein S12 OS=Homo sapiens GN=RPS12 PE=1 SV=3	14.5	7.7	26.8 (M:26.8)
44	SNX4_HUMAN	Sorting nexin-4 OS=Homo sapiens GN=SNX4 PE=1 SV=1	51.9	5.6	26.7 (M:26.7)
45	AAAS_HUMAN	Aladin OS=Homo sapiens GN=AAAS PE=1 SV=1	59.5	8.1	24.6 (M:24.6)
46	SF01_HUMAN	Splicing factor 1 OS=Homo sapiens GN=SF1 PE=1 SV=4	68.3	9.7	24.3 (M:24.3)
47	APOE_HUMAN	Apolipoprotein E OS=Homo sapiens GN=APOE PE=1 SV=1	36.1	5.5	23.8 (M:23.8)
48	K0907_HUMAN	UPF0469 protein KIAA0907 OS=Homo sapiens GN=KIAA0907 PE=1 SV=1	64.8	9.4	23.8 (M:23.8)
49	MTOR_HUMAN	Serine/threonine-protein kinase mTOR OS=Homo sapiens GN=MTOR PE=1 SV=1	288.7	6.8	23.6 (M:23.6)
50	CYHR1_HUMAN	Cysteine and histidine-rich protein 1 OS=Homo sapiens GN=CYHR1 PE=1 SV=2	40.7	7.1	23.6 (M:23.6)
51	MINT_HUMAN	Msx2-interacting protein OS=Homo sapiens GN=SPEN PE=1 SV=1	402.0	7.5	23.5 (M:23.5)
52	CI163_HUMAN	Uncharacterized protein C9orf163 OS=Homo sapiens GN=C9orf163 PE=2 SV=1	22.1	12.9	22.8 (M:22.8)
53	PIEZ2_HUMAN	Piezo-type mechanosensitive ion channel component 2 OS=Homo sapiens GN=PIEZO2 PE=1 SV=2	317.9	5.8	22.0 (M:22.0)
54	HGB1A_HUMAN	Putative high mobility group protein B1-like 1 OS=Homo sapiens GN=HMGB1P1 PE=5 SV=1	24.2	5.9	21.9 (M:21.9)
55	FR1L4_HUMAN	Fer-1-like protein 4 OS=Homo sapiens GN=FER1L4 PE=2 SV=1	200.9	5.8	21.8 (M:21.8)
56	MOS_HUMAN	Proto-oncogene serine/threonine-protein kinase mos OS=Homo sapiens GN=MOS PE=1 SV=1	37.8	10.1	21.6 (M:21.6)
57	OFUT1_HUMAN	GDP-fucose protein O-fucosyltransferase 1 OS=Homo sapiens GN=POFUT1 PE=1 SV=1	43.9	9.5	21.3 (M:21.3)
58	TESK1_HUMAN	Dual specificity testis-specific protein kinase 1 OS=Homo sapiens GN=TESK1 PE=1 SV=2	67.6	9.7	21.1 (M:21.1)
59	WDR89_HUMAN	WD repeat-containing protein 89 OS=Homo sapiens GN=WDR89 PE=2 SV=1	43.2	5.7	20.2 (M:20.2)
60	PPARG_HUMAN	Peroxisome proliferator-activated receptor gamma OS=Homo sapiens GN=PPARG PE=1 SV=3	57.6	5.5	20.1 (M:20.1)
61	T151A_HUMAN	Transmembrane protein 151A OS=Homo sapiens GN=TMEM151A PE=2 SV=1	51.2	9.3	19.2 (M:19.2)
62	IGS21_HUMAN	Immunoglobulin superfamily member 21 OS=Homo sapiens GN=IGSF21 PE=2 SV=1	51.8	6.5	19.1 (M:19.1)
63	PSIP1_HUMAN	PC4 and SFRS1-interacting protein OS=Homo sapiens GN=PSIP1 PE=1 SV=1	60.1	9.7	19.1 (M:19.1)
64	GCN1_HUMAN	eIF-2-alpha kinase activator GCN1 OS=Homo sapiens GN=GCN1 PE=1 SV=6	292.6	7.6	18.9 (M:18.9)
65	REXON_HUMAN	Putative RNA exonuclease NEF-sp OS=Homo sapiens GN=44M2.3 PE=2 SV=1	86.8	9.6	18.9 (M:18.9)
66	N4BP1_HUMAN	NEDD4-binding protein 1 OS=Homo sapiens GN=N4BP1 PE=1 SV=4	100.3	5.1	18.8 (M:18.8)
67	MA2A2_HUMAN	Alpha-mannosidase 2x OS=Homo sapiens GN=MAN2A2 PE=2 SV=3	130.5	6.4	18.8 (M:18.8)
68	OVOL2_HUMAN	Transcription factor Ovo-like 2 OS=Homo sapiens GN=OVOL2 PE=1 SV=1	30.4	10.0	18.8 (M:18.8)
69	MGAP_HUMAN	MAX gene-associated protein OS=Homo sapiens GN=MGA PE=1 SV=3	331.6	6.3	18.7 (M:18.7)
70	VIR_HUMAN	Protein virilizer homolog OS=Homo sapiens GN=KIAA1429 PE=1 SV=2	201.9	4.8	18.6 (M:18.6)
71	SHD_HUMAN	SH2 domain-containing adapter protein D OS=Homo sapiens GN=SHD PE=1 SV=1	38.2	4.7	18.5 (M:18.5)
72	MCIN_HUMAN	Multicilin OS=Homo sapiens GN=MCIDAS PE=1 SV=1	41.7	5.5	18.4 (M:18.4)
73	I12R1_HUMAN	Interleukin-12 receptor subunit beta-1 OS=Homo sapiens GN=IL12RB1 PE=1 SV=1	73.1	5.2	18.4 (M:18.4)
74	SPAG5_HUMAN	Sperm-associated antigen 5 OS=Homo sapiens GN=SPAG5 PE=1 SV=2	134.3	4.8	18.2 (M:18.2)
75	PDIA5_HUMAN	Protein disulfide-isomerase A5 OS=Homo sapiens GN=PDIA5 PE=1 SV=1	59.6	8.9	18.1 (M:18.1)
76	KHDR1_HUMAN	KH domain-containing, RNA-binding, signal transduction-associated protein 1 OS=Homo sapiens GN=KHDRBS1 PE=1 SV=1	48.2	9.2	18.0 (M:18.0)
77	GLPK3_HUMAN	Glycerol kinase 3 OS=Homo sapiens GN=GK3P PE=2 SV=2	60.6	6.0	18.0 (M:18.0)
78	SNR27_HUMAN	U4/U6.U5 small nuclear ribonucleoprotein 27 kDa protein OS=Homo sapiens GN=SNRNP27 PE=1 SV=1	18.8	12.1	18.0 (M:18.0)
79	ZGRF1_HUMAN	Protein ZGRF1 OS=Homo sapiens GN=ZGRF1 PE=1 SV=3	236.5	5.8	17.9 (M:17.9)
80	PI3R4_HUMAN	Phosphoinositide 3-kinase regulatory subunit 4 OS=Homo sapiens GN=PIK3R4 PE=1 SV=3	153.0	6.8	17.6 (M:17.6)
81	B3GL2_HUMAN	UDP-GalNAc:beta-1,3-N-acetylgalactosaminyltransferase 2 OS=Homo sapiens GN=B3GALNT2 PE=1 SV=1	56.7	5.4	17.6 (M:17.6)
82	UBA7_HUMAN	Ubiquitin-like modifier-activating enzyme 7 OS=Homo sapiens GN=UBA7 PE=1 SV=2	111.6	5.6	17.5 (M:17.5)
83	PRS56_HUMAN	Serine protease 56 OS=Homo sapiens GN=PRSS56 PE=1 SV=1	64.6	11.2	17.4 (M:17.4)
84	MYH16_HUMAN	Putative uncharacterized protein MYH16 OS=Homo sapiens GN=MYH16 PE=1 SV=2	128.2	5.4	17.3 (M:17.3)
85	SPYA_HUMAN	Serine--pyruvate aminotransferase OS=Homo sapiens GN=AGXT PE=1 SV=1	43.0	9.4	17.3 (M:17.3)
86	TM163_HUMAN	Transmembrane protein 163 OS=Homo sapiens GN=TMEM163 PE=2 SV=1	31.4	7.9	17.2 (M:17.2)
87	MS3L1_HUMAN	Male-specific lethal 3 homolog OS=Homo sapiens GN=MSL3 PE=1 SV=1	59.8	9.2	17.2 (M:17.2)
88	CD3Z_HUMAN	T-cell surface glycoprotein CD3 zeta chain OS=Homo sapiens GN=CD247 PE=1 SV=2	18.7	9.7	17.2 (M:17.2)
89	E41LA_HUMAN	Band 4.1-like protein 4A OS=Homo sapiens GN=EPB41L4A PE=1 SV=2	79.0	10.0	17.1 (M:17.1)
90	PI4KB_HUMAN	Phosphatidylinositol 4-kinase beta OS=Homo sapiens GN=PI4KB PE=1 SV=1	91.3	5.8	17.1 (M:17.1)
91	ITPR2_HUMAN	Inositol 1,4,5-trisphosphate receptor type 2 OS=Homo sapiens GN=ITPR2 PE=1 SV=2	307.9	6.0	17.1 (M:17.1)
92	DYH3_HUMAN	Dynein heavy chain 3, axonemal OS=Homo sapiens GN=DNAH3 PE=2 SV=1	470.5	6.0	17.0 (M:17.0)
93	DHB7_HUMAN	3-keto-steroid reductase OS=Homo sapiens GN=HSD17B7 PE=1 SV=1	38.2	9.3	17.0 (M:17.0)
94	MA7D2_HUMAN	MAP7 domain-containing protein 2 OS=Homo sapiens GN=MAP7D2 PE=1 SV=2	81.9	9.6	17.0 (M:17.0)
95	KGP1_HUMAN	cGMP-dependent protein kinase 1 OS=Homo sapiens GN=PRKG1 PE=1 SV=3	76.3	5.7	17.0 (M:17.0)
96	TBC9B_HUMAN	TBC1 domain family member 9B OS=Homo sapiens GN=TBC1D9B PE=1 SV=3	140.4	5.0	17.0 (M:17.0)
97	SI1L2_HUMAN	Signal-induced proliferation-associated 1-like protein 2 OS=Homo sapiens GN=SIPA1L2 PE=1 SV=2	190.3	6.3	16.9 (M:16.9)
98	IGBP1_HUMAN	Immunoglobulin-binding protein 1 OS=Homo sapiens GN=IGBP1 PE=1 SV=1	39.2	5.1	16.8 (M:16.8)
99	MCM8_HUMAN	DNA helicase MCM8 OS=Homo sapiens GN=MCM8 PE=1 SV=2	93.6	8.7	16.8 (M:16.8)
100	BCAS3_HUMAN	Breast carcinoma-amplified sequence 3 OS=Homo sapiens GN=BCAS3 PE=1 SV=3	101.2	6.2	16.8 (M:16.8)
101	Z280D_HUMAN	Zinc finger protein 280D OS=Homo sapiens GN=ZNF280D PE=1 SV=3	109.2	9.5	16.7 (M:16.7)
102	PAPD1_HUMAN	Poly(A) RNA polymerase, mitochondrial OS=Homo sapiens GN=MTPAP PE=1 SV=1	66.1	10.2	16.7 (M:16.7)
103	ROA3_HUMAN	Heterogeneous nuclear ribonucleoprotein A3 OS=Homo sapiens GN=HNRNPA3 PE=1 SV=2	39.6	9.6	16.6 (M:16.6)
104	MYO5A_HUMAN	Unconventional myosin-Va OS=Homo sapiens GN=MYO5A PE=1 SV=2	215.3	9.4	16.4 (M:16.4)
105	ABCAC_HUMAN	ATP-binding cassette sub-family A member 12 OS=Homo sapiens GN=ABCA12 PE=1 SV=3	293.0	8.6	16.3 (M:16.3)
106	NPM3_HUMAN	Nucleoplasmin-3 OS=Homo sapiens GN=NPM3 PE=1 SV=3	19.3	4.4	16.3 (M:16.3)
107	CA112_HUMAN	Uncharacterized protein C1orf112 OS=Homo sapiens GN=C1orf112 PE=1 SV=1	96.5	5.6	16.3 (M:16.3)
108	UBE2U_HUMAN	Ubiquitin-conjugating enzyme E2 U OS=Homo sapiens GN=UBE2U PE=1 SV=1	37.7	4.9	16.3 (M:16.3)
109	FUBP2_HUMAN	Far upstream element-binding protein 2 OS=Homo sapiens GN=KHSRP PE=1 SV=4	73.1	7.0	16.2 (M:16.2)
110	MFF_HUMAN	Mitochondrial fission factor OS=Homo sapiens GN=MFF PE=1 SV=1	38.4	9.5	16.2 (M:16.2)
111	MOV10_HUMAN	Putative helicase MOV-10 OS=Homo sapiens GN=MOV10 PE=1 SV=2	113.6	9.7	16.2 (M:16.2)
112	CDKL2_HUMAN	Cyclin-dependent kinase-like 2 OS=Homo sapiens GN=CDKL2 PE=1 SV=1	56.0	9.3	16.1 (M:16.1)
113	KPYM_HUMAN	Pyruvate kinase PKM OS=Homo sapiens GN=PKM PE=1 SV=4	57.9	9.0	16.1 (M:16.1)
114	CHIN_HUMAN	N-chimaerin OS=Homo sapiens GN=CHN1 PE=1 SV=3	53.1	6.5	16.1 (M:16.1)
115	ATS7_HUMAN	A disintegrin and metalloproteinase with thrombospondin motifs 7 OS=Homo sapiens GN=ADAMTS7 PE=1 SV=2	184.0	5.8	16.1 (M:16.1)
116	DNLI3_HUMAN	DNA ligase 3 OS=Homo sapiens GN=LIG3 PE=1 SV=2	112.8	10.0	16.0 (M:16.0)
117	VMAT2_HUMAN	Synaptic vesicular amine transporter OS=Homo sapiens GN=SLC18A2 PE=1 SV=2	55.7	5.6	15.9 (M:15.9)
118	CAN12_HUMAN	Calpain-12 OS=Homo sapiens GN=CAPN12 PE=2 SV=1	81.0	5.9	15.8 (M:15.8)
119	TPPP_HUMAN	Tubulin polymerization-promoting protein OS=Homo sapiens GN=TPPP PE=1 SV=1	23.7	10.1	15.8 (M:15.8)
120	MYO9B_HUMAN	Unconventional myosin-IXb OS=Homo sapiens GN=MYO9B PE=1 SV=3	243.2	9.5	15.8 (M:15.8)
121	GRDN_HUMAN	Girdin OS=Homo sapiens GN=CCDC88A PE=1 SV=2	215.9	5.8	15.8 (M:15.8)
122	ADT2_HUMAN	ADP/ATP translocase 2 OS=Homo sapiens GN=SLC25A5 PE=1 SV=7	32.8	10.2	15.8 (M:15.8)
123	WDR66_HUMAN	WD repeat-containing protein 66 OS=Homo sapiens GN=WDR66 PE=2 SV=2	129.9	4.9	15.7 (M:15.7)
124	MARE2_HUMAN	Microtubule-associated protein RP/EB family member 2 OS=Homo sapiens GN=MAPRE2 PE=1 SV=1	37.0	5.3	15.6 (M:15.6)
125	GINM1_HUMAN	Glycoprotein integral membrane protein 1 OS=Homo sapiens GN=GINM1 PE=2 SV=1	36.8	4.7	15.4 (M:15.4)
126	TBCD1_HUMAN	TBC1 domain family member 1 OS=Homo sapiens GN=TBC1D1 PE=1 SV=2	133.0	6.5	15.4 (M:15.4)
127	MYO1D_HUMAN	Unconventional myosin-Id OS=Homo sapiens GN=MYO1D PE=1 SV=2	116.1	10.0	15.4 (M:15.4)
128	E2F8_HUMAN	Transcription factor E2F8 OS=Homo sapiens GN=E2F8 PE=1 SV=1	94.1	9.8	15.4 (M:15.4)
129	SMRCD_HUMAN	SWI/SNF-related matrix-associated actin-dependent regulator of chromatin subfamily A containing DEAD/H box 1 OS=Homo sapiens GN=SMARCAD1 PE=1 SV=2	117.3	5.3	15.3 (M:15.3)
130	EDRF1_HUMAN	Erythroid differentiation-related factor 1 OS=Homo sapiens GN=EDRF1 PE=1 SV=1	138.4	5.9	15.3 (M:15.3)
131	LMNA_HUMAN	Prelamin-A/C OS=Homo sapiens GN=LMNA PE=1 SV=1	74.1	6.6	15.3 (M:15.3)
132	TRFM_HUMAN	Melanotransferrin OS=Homo sapiens GN=MELTF PE=1 SV=2	80.2	5.5	15.2 (M:15.2)
133	MFRN1_HUMAN	Mitoferrin-1 OS=Homo sapiens GN=SLC25A37 PE=2 SV=2	37.3	9.8	15.1 (M:15.1)
134	NMI_HUMAN	N-myc-interactor OS=Homo sapiens GN=NMI PE=1 SV=2	35.0	5.1	15.1 (M:15.1)
135	LRC20_HUMAN	Leucine-rich repeat-containing protein 20 OS=Homo sapiens GN=LRRC20 PE=1 SV=1	20.5	6.1	15.0 (M:15.0)

## Sheet: MKL-1
Row	Accession	Protein	MW [kDa]	pI	Scores
1	H15_HUMAN	Histone H1.5 OS=Homo sapiens GN=HIST1H1B PE=1 SV=3	22.6	11.4	715.2 (M:715.2)
2	H2B1D_HUMAN	Histone H2B type 1-D OS=Homo sapiens GN=HIST1H2BD PE=1 SV=2	13.9	10.8	612.6 (M:612.6)
3	H14_HUMAN	Histone H1.4 OS=Homo sapiens GN=HIST1H1E PE=1 SV=2	21.9	11.5	595.8 (M:595.8)
4	H4_HUMAN	Histone H4 OS=Homo sapiens GN=HIST1H4A PE=1 SV=2	11.4	11.8	530.0 (M:530.0)
5	H2B1O_HUMAN	Histone H2B type 1-O OS=Homo sapiens GN=HIST1H2BO PE=1 SV=3	13.9	10.8	517.0 (M:517.0)
6	H2A2C_HUMAN	Histone H2A type 2-C OS=Homo sapiens GN=HIST2H2AC PE=1 SV=4	14.0	11.4	421.3 (M:421.3)
7	H2A1B_HUMAN	Histone H2A type 1-B/E OS=Homo sapiens GN=HIST1H2AB PE=1 SV=2	14.1	11.5	399.8 (M:399.8)
8	HNRPK_HUMAN	Heterogeneous nuclear ribonucleoprotein K OS=Homo sapiens GN=HNRNPK PE=1 SV=1	50.9	5.3	246.9 (M:246.9)
9	ROA1_HUMAN	Heterogeneous nuclear ribonucleoprotein A1 OS=Homo sapiens GN=HNRNPA1 PE=1 SV=5	38.7	9.6	244.8 (M:244.8)
10	CH10_HUMAN	10 kDa heat shock protein, mitochondrial OS=Homo sapiens GN=HSPE1 PE=1 SV=2	10.9	9.4	229.4 (M:229.4)
11	ACTB_HUMAN	Actin, cytoplasmic 1 OS=Homo sapiens GN=ACTB PE=1 SV=1	41.7	5.2	219.8 (M:219.8)
12	ALBU_HUMAN	Serum albumin OS=Homo sapiens GN=ALB PE=1 SV=2	69.3	5.9	196.9 (M:196.9)
13	K22E_HUMAN	Keratin, type II cytoskeletal 2 epidermal OS=Homo sapiens GN=KRT2 PE=1 SV=2	65.4	8.9	184.7 (M:184.7)
14	H2AV_HUMAN	Histone H2A.V OS=Homo sapiens GN=H2AFV PE=1 SV=3	13.5	11.0	135.0 (M:135.0)
15	K2C1_HUMAN	Keratin, type II cytoskeletal 1 OS=Homo sapiens GN=KRT1 PE=1 SV=6	66.0	8.8	131.7 (M:131.7)
16	FUBP2_HUMAN	Far upstream element-binding protein 2 OS=Homo sapiens GN=KHSRP PE=1 SV=4	73.1	7.0	131.6 (M:131.6)
17	ROA2_HUMAN	Heterogeneous nuclear ribonucleoproteins A2/B1 OS=Homo sapiens GN=HNRNPA2B1 PE=1 SV=2	37.4	9.3	123.8 (M:123.8)
18	NUMA1_HUMAN	Nuclear mitotic apparatus protein 1 OS=Homo sapiens GN=NUMA1 PE=1 SV=2	238.1	5.5	123.5 (M:123.5)
19	THOC4_HUMAN	THO complex subunit 4 OS=Homo sapiens GN=ALYREF PE=1 SV=3	26.9	11.6	117.8 (M:117.8)
20	H2B2D_HUMAN	Putative histone H2B type 2-D OS=Homo sapiens GN=HIST2H2BD PE=5 SV=3	18.0	12.0	110.2 (M:110.2)
21	H3C_HUMAN	Histone H3.3C OS=Homo sapiens GN=H3F3C PE=1 SV=3	15.2	11.9	109.1 (M:109.1)
22	APOC3_HUMAN	Apolipoprotein C-III OS=Homo sapiens GN=APOC3 PE=1 SV=1	10.8	5.1	107.0 (M:107.0)
23	HNRPU_HUMAN	Heterogeneous nuclear ribonucleoprotein U OS=Homo sapiens GN=HNRNPU PE=1 SV=6	90.5	5.7	98.1 (M:98.1)
24	STMN1_HUMAN	Stathmin OS=Homo sapiens GN=STMN1 PE=1 SV=3	17.3	5.7	94.2 (M:94.2)
25	HGB1A_HUMAN	Putative high mobility group protein B1-like 1 OS=Homo sapiens GN=HMGB1P1 PE=5 SV=1	24.2	5.9	88.8 (M:88.8)
26	LMNB1_HUMAN	Lamin-B1 OS=Homo sapiens GN=LMNB1 PE=1 SV=2	66.4	5.0	88.1 (M:88.1)
27	K1C10_HUMAN	Keratin, type I cytoskeletal 10 OS=Homo sapiens GN=KRT10 PE=1 SV=6	58.8	5.0	85.0 (M:85.0)
28	CAZA1_HUMAN	F-actin-capping protein subunit alpha-1 OS=Homo sapiens GN=CAPZA1 PE=1 SV=3	32.9	5.4	84.0 (M:84.0)
29	HBB_HUMAN	Hemoglobin subunit beta OS=Homo sapiens GN=HBB PE=1 SV=2	16.0	6.9	83.7 (M:83.7)
30	K2C8_HUMAN	Keratin, type II cytoskeletal 8 OS=Homo sapiens GN=KRT8 PE=1 SV=7	53.7	5.4	81.1 (M:81.1)
31	SRSF3_HUMAN	Serine/arginine-rich splicing factor 3 OS=Homo sapiens GN=SRSF3 PE=1 SV=1	19.3	12.3	79.9 (M:79.9)
32	TPIS_HUMAN	Triosephosphate isomerase OS=Homo sapiens GN=TPI1 PE=1 SV=3	30.8	5.6	79.6 (M:79.6)
33	PEDF_HUMAN	Pigment epithelium-derived factor OS=Homo sapiens GN=SERPINF1 PE=1 SV=4	46.3	6.0	79.4 (M:79.4)
34	TBA1C_HUMAN	Tubulin alpha-1C chain OS=Homo sapiens GN=TUBA1C PE=1 SV=1	49.9	4.8	77.9 (M:77.9)
35	HNRPD_HUMAN	Heterogeneous nuclear ribonucleoprotein D0 OS=Homo sapiens GN=HNRNPD PE=1 SV=1	38.4	8.5	74.9 (M:74.9)
36	COF1_HUMAN	Cofilin-1 OS=Homo sapiens GN=CFL1 PE=1 SV=3	18.5	9.1	74.4 (M:74.4)
37	TBB5_HUMAN	Tubulin beta chain OS=Homo sapiens GN=TUBB PE=1 SV=2	49.6	4.6	74.2 (M:74.2)
38	PRDX2_HUMAN	Peroxiredoxin-2 OS=Homo sapiens GN=PRDX2 PE=1 SV=5	21.9	5.6	70.8 (M:70.8)
39	K2C1B_HUMAN	Keratin, type II cytoskeletal 1b OS=Homo sapiens GN=KRT77 PE=2 SV=3	61.9	5.6	68.2 (M:68.2)
40	ATPB_HUMAN	ATP synthase subunit beta, mitochondrial OS=Homo sapiens GN=ATP5B PE=1 SV=3	56.5	5.1	67.4 (M:67.4)
41	RS12_HUMAN	40S ribosomal protein S12 OS=Homo sapiens GN=RPS12 PE=1 SV=3	14.5	7.7	66.5 (M:66.5)
42	PPIA_HUMAN	Peptidyl-prolyl cis-trans isomerase A OS=Homo sapiens GN=PPIA PE=1 SV=2	18.0	9.0	66.0 (M:66.0)
43	DUT_HUMAN	Deoxyuridine 5'-triphosphate nucleotidohydrolase, mitochondrial OS=Homo sapiens GN=DUT PE=1 SV=4	26.5	10.2	65.1 (M:65.1)
44	RLA2_HUMAN	60S acidic ribosomal protein P2 OS=Homo sapiens GN=RPLP2 PE=1 SV=1	11.7	4.2	63.1 (M:63.1)
45	LEG7_HUMAN	Galectin-7 OS=Homo sapiens GN=LGALS7 PE=1 SV=2	15.1	8.0	63.1 (M:63.1)
46	SH3L3_HUMAN	SH3 domain-binding glutamic acid-rich-like protein 3 OS=Homo sapiens GN=SH3BGRL3 PE=1 SV=1	10.4	4.7	62.5 (M:62.5)
47	SRP09_HUMAN	Signal recognition particle 9 kDa protein OS=Homo sapiens GN=SRP9 PE=1 SV=2	10.1	9.1	61.4 (M:61.4)
48	SF01_HUMAN	Splicing factor 1 OS=Homo sapiens GN=SF1 PE=1 SV=4	68.3	9.7	60.6 (M:60.6)
49	HMGN2_HUMAN	Non-histone chromosomal protein HMG-17 OS=Homo sapiens GN=HMGN2 PE=1 SV=3	9.4	10.5	60.5 (M:60.5)
50	MIF_HUMAN	Macrophage migration inhibitory factor OS=Homo sapiens GN=MIF PE=1 SV=4	12.5	9.1	60.3 (M:60.3)
51	ATPA_HUMAN	ATP synthase subunit alpha, mitochondrial OS=Homo sapiens GN=ATP5A1 PE=1 SV=1	59.7	9.6	58.9 (M:58.9)
52	HBA_HUMAN	Hemoglobin subunit alpha OS=Homo sapiens GN=HBA1 PE=1 SV=2	15.2	9.4	57.0 (M:57.0)
53	KCRB_HUMAN	Creatine kinase B-type OS=Homo sapiens GN=CKB PE=1 SV=1	42.6	5.2	56.2 (M:56.2)
54	PROF1_HUMAN	Profilin-1 OS=Homo sapiens GN=PFN1 PE=1 SV=2	15.0	9.4	55.3 (M:55.3)
55	CO4B_HUMAN	Complement C4-B OS=Homo sapiens GN=C4B PE=1 SV=2	192.6	7.0	54.8 (M:54.8)
56	PDIA6_HUMAN	Protein disulfide-isomerase A6 OS=Homo sapiens GN=PDIA6 PE=1 SV=1	48.1	4.8	54.1 (M:54.1)
57	ITIH2_HUMAN	Inter-alpha-trypsin inhibitor heavy chain H2 OS=Homo sapiens GN=ITIH2 PE=1 SV=2	106.4	6.4	52.0 (M:52.0)
58	TRFL_HUMAN	Lactotransferrin OS=Homo sapiens GN=LTF PE=1 SV=6	78.1	9.6	49.8 (M:49.8)
59	LMNA_HUMAN	Prelamin-A/C OS=Homo sapiens GN=LMNA PE=1 SV=1	74.1	6.6	49.8 (M:49.8)
60	HSP7C_HUMAN	Heat shock cognate 71 kDa protein OS=Homo sapiens GN=HSPA8 PE=1 SV=1	70.9	5.2	48.9 (M:48.9)
61	ROA3_HUMAN	Heterogeneous nuclear ribonucleoprotein A3 OS=Homo sapiens GN=HNRNPA3 PE=1 SV=2	39.6	9.6	47.7 (M:47.7)
62	CH60_HUMAN	60 kDa heat shock protein, mitochondrial OS=Homo sapiens GN=HSPD1 PE=1 SV=2	61.0	5.6	44.7 (M:44.7)
63	TPM3_HUMAN	Tropomyosin alpha-3 chain OS=Homo sapiens GN=TPM3 PE=1 SV=2	32.9	4.5	44.1 (M:44.1)
64	RS19_HUMAN	40S ribosomal protein S19 OS=Homo sapiens GN=RPS19 PE=1 SV=2	16.1	10.7	43.5 (M:43.5)
65	LSM8_HUMAN	U6 snRNA-associated Sm-like protein LSm8 OS=Homo sapiens GN=LSM8 PE=1 SV=3	10.4	4.2	39.1 (M:39.1)
66	RS28_HUMAN	40S ribosomal protein S28 OS=Homo sapiens GN=RPS28 PE=1 SV=1	7.8	11.6	39.0 (M:39.0)
67	FRG1_HUMAN	Protein FRG1 OS=Homo sapiens GN=FRG1 PE=1 SV=1	29.2	9.8	38.4 (M:38.4)
68	SFPQ_HUMAN	Splicing factor, proline- and glutamine-rich OS=Homo sapiens GN=SFPQ PE=1 SV=2	76.1	9.9	38.2 (M:38.2)
69	H10_HUMAN	Histone H1.0 OS=Homo sapiens GN=H1F0 PE=1 SV=3	20.9	11.3	35.8 (M:35.8)
70	CMTA1_HUMAN	Calmodulin-binding transcription activator 1 OS=Homo sapiens GN=CAMTA1 PE=1 SV=4	183.6	7.6	35.4 (M:35.4)
71	TIF1B_HUMAN	Transcription intermediary factor 1-beta OS=Homo sapiens GN=TRIM28 PE=1 SV=5	88.5	5.4	35.3 (M:35.3)
72	EF1A1_HUMAN	Elongation factor 1-alpha 1 OS=Homo sapiens GN=EEF1A1 PE=1 SV=1	50.1	9.7	34.0 (M:34.0)
73	TUT4_HUMAN	Terminal uridylyltransferase 4 OS=Homo sapiens GN=ZCCHC11 PE=1 SV=3	185.0	9.3	34.0 (M:34.0)
74	NDKA_HUMAN	Nucleoside diphosphate kinase A OS=Homo sapiens GN=NME1 PE=1 SV=1	17.1	5.8	33.3 (M:33.3)
75	LUZP1_HUMAN	Leucine zipper protein 1 OS=Homo sapiens GN=LUZP1 PE=1 SV=2	120.2	9.4	32.5 (M:32.5)
76	IBP2_HUMAN	Insulin-like growth factor-binding protein 2 OS=Homo sapiens GN=IGFBP2 PE=1 SV=2	34.8	8.9	32.4 (M:32.4)
77	OLIG1_HUMAN	Oligodendrocyte transcription factor 1 OS=Homo sapiens GN=OLIG1 PE=1 SV=2	27.9	10.5	32.3 (M:32.3)
78	YP023_HUMAN	Putative uncharacterized protein FLJ34945 OS=Homo sapiens PE=2 SV=1	14.2	12.6	32.0 (M:32.0)
79	K0907_HUMAN	UPF0469 protein KIAA0907 OS=Homo sapiens GN=KIAA0907 PE=1 SV=1	64.8	9.4	31.0 (M:31.0)
80	HSPB1_HUMAN	Heat shock protein beta-1 OS=Homo sapiens GN=HSPB1 PE=1 SV=2	22.8	6.0	29.7 (M:29.7)
81	FCERG_HUMAN	High affinity immunoglobulin epsilon receptor subunit gamma OS=Homo sapiens GN=FCER1G PE=1 SV=1	9.7	7.5	29.3 (M:29.3)
82	SNX4_HUMAN	Sorting nexin-4 OS=Homo sapiens GN=SNX4 PE=1 SV=1	51.9	5.6	28.9 (M:28.9)
83	K1C9_HUMAN	Keratin, type I cytoskeletal 9 OS=Homo sapiens GN=KRT9 PE=1 SV=3	62.0	5.0	28.8 (M:28.8)
84	PSIP1_HUMAN	PC4 and SFRS1-interacting protein OS=Homo sapiens GN=PSIP1 PE=1 SV=1	60.1	9.7	28.3 (M:28.3)
85	MTOR_HUMAN	Serine/threonine-protein kinase mTOR OS=Homo sapiens GN=MTOR PE=1 SV=1	288.7	6.8	27.6 (M:27.6)
86	RL26L_HUMAN	60S ribosomal protein L26-like 1 OS=Homo sapiens GN=RPL26L1 PE=1 SV=1	17.2	11.0	26.6 (M:26.6)
87	CCAR1_HUMAN	Cell division cycle and apoptosis regulator protein 1 OS=Homo sapiens GN=CCAR1 PE=1 SV=2	132.7	5.5	26.3 (M:26.3)
88	CDIPT_HUMAN	CDP-diacylglycerol--inositol 3-phosphatidyltransferase OS=Homo sapiens GN=CDIPT PE=1 SV=1	23.5	9.3	25.6 (M:25.6)
89	CECR1_HUMAN	Adenosine deaminase CECR1 OS=Homo sapiens GN=CECR1 PE=1 SV=2	58.9	8.6	24.9 (M:24.9)
90	CCER2_HUMAN	Coiled-coil domain-containing glutamate-rich protein 2 OS=Homo sapiens GN=CCER2 PE=3 SV=1	30.3	5.2	24.1 (M:24.1)
91	MOS_HUMAN	Proto-oncogene serine/threonine-protein kinase mos OS=Homo sapiens GN=MOS PE=1 SV=1	37.8	10.1	24.1 (M:24.1)
92	FKBP3_HUMAN	Peptidyl-prolyl cis-trans isomerase FKBP3 OS=Homo sapiens GN=FKBP3 PE=1 SV=1	25.2	9.8	24.0 (M:24.0)
93	RS13_HUMAN	40S ribosomal protein S13 OS=Homo sapiens GN=RPS13 PE=1 SV=2	17.2	11.0	23.6 (M:23.6)
94	LRMP_HUMAN	Lymphoid-restricted membrane protein OS=Homo sapiens GN=LRMP PE=1 SV=3	62.1	5.5	23.2 (M:23.2)
95	CI163_HUMAN	Uncharacterized protein C9orf163 OS=Homo sapiens GN=C9orf163 PE=2 SV=1	22.1	12.9	22.7 (M:22.7)
96	OFUT1_HUMAN	GDP-fucose protein O-fucosyltransferase 1 OS=Homo sapiens GN=POFUT1 PE=1 SV=1	43.9	9.5	22.1 (M:22.1)
97	K1468_HUMAN	LisH domain and HEAT repeat-containing protein KIAA1468 OS=Homo sapiens GN=KIAA1468 PE=1 SV=2	134.5	5.2	21.7 (M:21.7)
98	PRVA_HUMAN	Parvalbumin alpha OS=Homo sapiens GN=PVALB PE=1 SV=2	12.1	4.8	21.4 (M:21.4)
99	PAR12_HUMAN	Poly [ADP-ribose] polymerase 12 OS=Homo sapiens GN=PARP12 PE=1 SV=1	79.0	9.8	20.8 (M:20.8)
100	RNF8_HUMAN	E3 ubiquitin-protein ligase RNF8 OS=Homo sapiens GN=RNF8 PE=1 SV=1	55.5	7.8	20.7 (M:20.7)
101	SC11A_HUMAN	Signal peptidase complex catalytic subunit SEC11A OS=Homo sapiens GN=SEC11A PE=1 SV=1	20.6	9.9	20.1 (M:20.1)
102	MYBB_HUMAN	Myb-related protein B OS=Homo sapiens GN=MYBL2 PE=1 SV=1	78.7	6.4	20.0 (M:20.0)
103	SPAG5_HUMAN	Sperm-associated antigen 5 OS=Homo sapiens GN=SPAG5 PE=1 SV=2	134.3	4.8	19.9 (M:19.9)
104	DOT1L_HUMAN	Histone-lysine N-methyltransferase, H3 lysine-79 specific OS=Homo sapiens GN=DOT1L PE=1 SV=2	184.7	10.0	19.9 (M:19.9)
105	RFWD2_HUMAN	E3 ubiquitin-protein ligase RFWD2 OS=Homo sapiens GN=RFWD2 PE=1 SV=1	80.4	6.4	19.8 (M:19.8)
106	ADT2_HUMAN	ADP/ATP translocase 2 OS=Homo sapiens GN=SLC25A5 PE=1 SV=7	32.8	10.2	19.8 (M:19.8)
107	SAE2_HUMAN	SUMO-activating enzyme subunit 2 OS=Homo sapiens GN=UBA2 PE=1 SV=2	71.2	5.0	19.6 (M:19.6)
108	CXXC1_HUMAN	CXXC-type zinc finger protein 1 OS=Homo sapiens GN=CXXC1 PE=1 SV=2	75.7	9.8	19.4 (M:19.4)
109	IGBP1_HUMAN	Immunoglobulin-binding protein 1 OS=Homo sapiens GN=IGBP1 PE=1 SV=1	39.2	5.1	19.3 (M:19.3)
110	IKBZ_HUMAN	NF-kappa-B inhibitor zeta OS=Homo sapiens GN=NFKBIZ PE=1 SV=1	78.0	6.2	19.1 (M:19.1)
111	CHST7_HUMAN	Carbohydrate sulfotransferase 7 OS=Homo sapiens GN=CHST7 PE=1 SV=2	54.2	10.7	18.9 (M:18.9)
112	EVPL_HUMAN	Envoplakin OS=Homo sapiens GN=EVPL PE=1 SV=3	231.5	6.6	18.8 (M:18.8)
113	PDE4A_HUMAN	cAMP-specific 3',5'-cyclic phosphodiesterase 4A OS=Homo sapiens GN=PDE4A PE=1 SV=3	98.1	5.0	18.8 (M:18.8)
114	TAF4_HUMAN	Transcription initiation factor TFIID subunit 4 OS=Homo sapiens GN=TAF4 PE=1 SV=2	110.0	10.6	18.8 (M:18.8)
115	KCNH8_HUMAN	Potassium voltage-gated channel subfamily H member 8 OS=Homo sapiens GN=KCNH8 PE=2 SV=2	123.7	6.5	18.7 (M:18.7)
116	Z280D_HUMAN	Zinc finger protein 280D OS=Homo sapiens GN=ZNF280D PE=1 SV=3	109.2	9.5	18.7 (M:18.7)
117	KI16B_HUMAN	Kinesin-like protein KIF16B OS=Homo sapiens GN=KIF16B PE=1 SV=2	151.9	5.8	18.7 (M:18.7)
118	PI3R4_HUMAN	Phosphoinositide 3-kinase regulatory subunit 4 OS=Homo sapiens GN=PIK3R4 PE=1 SV=3	153.0	6.8	18.7 (M:18.7)
119	MOV10_HUMAN	Putative helicase MOV-10 OS=Homo sapiens GN=MOV10 PE=1 SV=2	113.6	9.7	18.6 (M:18.6)
120	LAP2B_HUMAN	Lamina-associated polypeptide 2, isoforms beta/gamma OS=Homo sapiens GN=TMPO PE=1 SV=2	50.6	9.8	18.5 (M:18.5)
121	ABCG1_HUMAN	ATP-binding cassette sub-family G member 1 OS=Homo sapiens GN=ABCG1 PE=1 SV=3	75.5	9.0	18.5 (M:18.5)
122	PON2_HUMAN	Serum paraoxonase/arylesterase 2 OS=Homo sapiens GN=PON2 PE=1 SV=3	39.4	5.2	18.3 (M:18.3)
123	TMC8_HUMAN	Transmembrane channel-like protein 8 OS=Homo sapiens GN=TMC8 PE=1 SV=1	81.6	10.4	18.0 (M:18.0)
124	TRI34_HUMAN	Tripartite motif-containing protein 34 OS=Homo sapiens GN=TRIM34 PE=1 SV=2	56.8	8.5	17.9 (M:17.9)
125	ACOXL_HUMAN	Acyl-coenzyme A oxidase-like protein OS=Homo sapiens GN=ACOXL PE=2 SV=3	61.8	9.5	17.9 (M:17.9)
126	CQ047_HUMAN	Uncharacterized protein C17orf47 OS=Homo sapiens GN=C17orf47 PE=2 SV=3	63.1	9.9	17.8 (M:17.8)
127	CYHR1_HUMAN	Cysteine and histidine-rich protein 1 OS=Homo sapiens GN=CYHR1 PE=1 SV=2	40.7	7.1	17.8 (M:17.8)
128	SI1L2_HUMAN	Signal-induced proliferation-associated 1-like protein 2 OS=Homo sapiens GN=SIPA1L2 PE=1 SV=2	190.3	6.3	17.7 (M:17.7)
129	FCRLB_HUMAN	Fc receptor-like B OS=Homo sapiens GN=FCRLB PE=1 SV=1	46.9	9.9	17.6 (M:17.6)
130	IPIL1_HUMAN	Inositol 1,4,5-trisphosphate receptor-interacting protein-like 1 OS=Homo sapiens GN=ITPRIPL1 PE=1 SV=1	63.4	6.0	17.6 (M:17.6)
131	UBA7_HUMAN	Ubiquitin-like modifier-activating enzyme 7 OS=Homo sapiens GN=UBA7 PE=1 SV=2	111.6	5.6	17.6 (M:17.6)
132	CNTN5_HUMAN	Contactin-5 OS=Homo sapiens GN=CNTN5 PE=1 SV=2	120.6	5.9	17.4 (M:17.4)
133	BCL7C_HUMAN	B-cell CLL/lymphoma 7 protein family member C OS=Homo sapiens GN=BCL7C PE=1 SV=3	23.5	5.0	17.4 (M:17.4)
134	FXL21_HUMAN	F-box/LRR-repeat protein 21 OS=Homo sapiens GN=FBXL21 PE=1 SV=1	49.1	6.0	17.3 (M:17.3)
135	MYO1D_HUMAN	Unconventional myosin-Id OS=Homo sapiens GN=MYO1D PE=1 SV=2	116.1	10.0	17.2 (M:17.2)
136	CLK3_HUMAN	Dual specificity protein kinase CLK3 OS=Homo sapiens GN=CLK3 PE=1 SV=3	73.5	10.7	17.2 (M:17.2)
137	PCIF1_HUMAN	Phosphorylated CTD-interacting factor 1 OS=Homo sapiens GN=PCIF1 PE=1 SV=1	80.6	7.3	17.0 (M:17.0)
138	IF4A3_HUMAN	Eukaryotic initiation factor 4A-III OS=Homo sapiens GN=EIF4A3 PE=1 SV=4	46.8	6.3	16.9 (M:16.9)
139	PRUNE_HUMAN	Protein prune homolog OS=Homo sapiens GN=PRUNE PE=1 SV=2	50.2	5.2	16.9 (M:16.9)
140	CCD25_HUMAN	Coiled-coil domain-containing protein 25 OS=Homo sapiens GN=CCDC25 PE=1 SV=2	24.5	6.4	16.8 (M:16.8)
141	CCD13_HUMAN	Coiled-coil domain-containing protein 13 OS=Homo sapiens GN=CCDC13 PE=1 SV=2	80.8	9.3	16.7 (M:16.7)
142	DNLI3_HUMAN	DNA ligase 3 OS=Homo sapiens GN=LIG3 PE=1 SV=2	112.8	10.0	16.7 (M:16.7)
143	FGF3_HUMAN	Fibroblast growth factor 3 OS=Homo sapiens GN=FGF3 PE=1 SV=1	26.9	11.5	16.7 (M:16.7)
144	NDUS7_HUMAN	NADH dehydrogenase [ubiquinone] iron-sulfur protein 7, mitochondrial OS=Homo sapiens GN=NDUFS7 PE=1 SV=3	23.5	10.8	16.7 (M:16.7)
145	MDGA1_HUMAN	MAM domain-containing glycosylphosphatidylinositol anchor protein 1 OS=Homo sapiens GN=MDGA1 PE=1 SV=1	105.7	9.5	16.7 (M:16.7)
146	NALP4_HUMAN	NACHT, LRR and PYD domains-containing protein 4 OS=Homo sapiens GN=NLRP4 PE=1 SV=3	113.3	5.5	16.7 (M:16.7)
147	FBXW7_HUMAN	F-box/WD repeat-containing protein 7 OS=Homo sapiens GN=FBXW7 PE=1 SV=1	79.6	5.4	16.6 (M:16.6)
148	ITPR2_HUMAN	Inositol 1,4,5-trisphosphate receptor type 2 OS=Homo sapiens GN=ITPR2 PE=1 SV=2	307.9	6.0	16.6 (M:16.6)
149	GOGA3_HUMAN	Golgin subfamily A member 3 OS=Homo sapiens GN=GOLGA3 PE=1 SV=2	167.3	5.2	16.6 (M:16.6)
150	G3P_HUMAN	Glyceraldehyde-3-phosphate dehydrogenase OS=Homo sapiens GN=GAPDH PE=1 SV=3	36.0	9.3	16.5 (M:16.5)
151	CMC2_HUMAN	Calcium-binding mitochondrial carrier protein Aralar2 OS=Homo sapiens GN=SLC25A13 PE=1 SV=2	74.1	9.4	16.5 (M:16.5)
152	LOXL3_HUMAN	Lysyl oxidase homolog 3 OS=Homo sapiens GN=LOXL3 PE=2 SV=1	83.1	6.4	16.5 (M:16.5)
153	S35A3_HUMAN	UDP-N-acetylglucosamine transporter OS=Homo sapiens GN=SLC35A3 PE=1 SV=1	36.0	9.6	16.4 (M:16.4)
154	MAK_HUMAN	Serine/threonine-protein kinase MAK OS=Homo sapiens GN=MAK PE=1 SV=2	70.5	10.1	16.4 (M:16.4)
155	RGPS1_HUMAN	Ras-specific guanine nucleotide-releasing factor RalGPS1 OS=Homo sapiens GN=RALGPS1 PE=1 SV=1	62.1	9.8	16.4 (M:16.4)
156	DJB14_HUMAN	DnaJ homolog subfamily B member 14 OS=Homo sapiens GN=DNAJB14 PE=1 SV=1	42.5	9.5	16.3 (M:16.3)
157	PPR18_HUMAN	Phostensin OS=Homo sapiens GN=PPP1R18 PE=1 SV=1	67.9	5.2	16.3 (M:16.3)
158	MYO9A_HUMAN	Unconventional myosin-IXa OS=Homo sapiens GN=MYO9A PE=1 SV=2	292.5	9.7	16.3 (M:16.3)
159	PTAR1_HUMAN	Protein prenyltransferase alpha subunit repeat-containing protein 1 OS=Homo sapiens GN=PTAR1 PE=1 SV=2	46.4	6.5	16.2 (M:16.2)
160	ZN788_HUMAN	Zinc finger protein 788 OS=Homo sapiens GN=ZNF788 PE=2 SV=2	71.9	10.6	16.2 (M:16.2)
161	2A5G_HUMAN	Serine/threonine-protein phosphatase 2A 56 kDa regulatory subunit gamma isoform OS=Homo sapiens GN=PPP2R5C PE=1 SV=3	61.0	6.4	16.1 (M:16.1)
162	HS12A_HUMAN	Heat shock 70 kDa protein 12A OS=Homo sapiens GN=HSPA12A PE=1 SV=2	74.9	6.3	16.0 (M:16.0)
163	TBCD1_HUMAN	TBC1 domain family member 1 OS=Homo sapiens GN=TBC1D1 PE=1 SV=2	133.0	6.5	16.0 (M:16.0)
164	MAST1_HUMAN	Microtubule-associated serine/threonine-protein kinase 1 OS=Homo sapiens GN=MAST1 PE=1 SV=2	170.6	9.4	15.9 (M:15.9)
165	PGAP1_HUMAN	GPI inositol-deacylase OS=Homo sapiens GN=PGAP1 PE=1 SV=1	105.3	9.7	15.9 (M:15.9)
166	RAB3I_HUMAN	Rab-3A-interacting protein OS=Homo sapiens GN=RAB3IP PE=1 SV=1	53.0	5.7	15.8 (M:15.8)
167	RN111_HUMAN	E3 ubiquitin-protein ligase Arkadia OS=Homo sapiens GN=RNF111 PE=1 SV=3	108.8	6.7	15.8 (M:15.8)
168	SUIS_HUMAN	Sucrase-isomaltase, intestinal OS=Homo sapiens GN=SI PE=1 SV=6	209.3	5.3	15.8 (M:15.8)
169	MPP9_HUMAN	M-phase phosphoprotein 9 OS=Homo sapiens GN=MPHOSPH9 PE=1 SV=4	132.9	5.9	15.8 (M:15.8)
170	MOCS1_HUMAN	Molybdenum cofactor biosynthesis protein 1 OS=Homo sapiens GN=MOCS1 PE=1 SV=3	70.1	10.4	15.7 (M:15.7)
171	BMAL2_HUMAN	Aryl hydrocarbon receptor nuclear translocator-like protein 2 OS=Homo sapiens GN=ARNTL2 PE=1 SV=2	70.8	7.2	15.7 (M:15.7)
172	KGP1_HUMAN	cGMP-dependent protein kinase 1 OS=Homo sapiens GN=PRKG1 PE=1 SV=3	76.3	5.7	15.7 (M:15.7)
173	TRIM4_HUMAN	E3 ubiquitin-protein ligase TRIM4 OS=Homo sapiens GN=TRIM4 PE=1 SV=2	57.4	9.4	15.7 (M:15.7)
174	PRKDC_HUMAN	DNA-dependent protein kinase catalytic subunit OS=Homo sapiens GN=PRKDC PE=1 SV=3	468.8	6.8	15.7 (M:15.7)
175	PRDX4_HUMAN	Peroxiredoxin-4 OS=Homo sapiens GN=PRDX4 PE=1 SV=1	30.5	5.8	15.7 (M:15.7)
176	DSC3_HUMAN	Desmocollin-3 OS=Homo sapiens GN=DSC3 PE=1 SV=3	99.9	5.7	15.6 (M:15.6)
177	AT10A_HUMAN	Probable phospholipid-transporting ATPase VA OS=Homo sapiens GN=ATP10A PE=2 SV=2	167.6	9.6	15.6 (M:15.6)
178	PMGE_HUMAN	Bisphosphoglycerate mutase OS=Homo sapiens GN=BPGM PE=1 SV=2	30.0	6.1	15.6 (M:15.6)
179	BHE41_HUMAN	Class E basic helix-loop-helix protein 41 OS=Homo sapiens GN=BHLHE41 PE=1 SV=1	50.5	7.2	15.6 (M:15.6)
180	FA35A_HUMAN	Protein FAM35A OS=Homo sapiens GN=FAM35A PE=2 SV=1	93.6	6.4	15.6 (M:15.6)
181	GUC2D_HUMAN	Retinal guanylyl cyclase 1 OS=Homo sapiens GN=GUCY2D PE=1 SV=2	120.0	7.4	15.6 (M:15.6)
182	CP4F8_HUMAN	Cytochrome P450 4F8 OS=Homo sapiens GN=CYP4F8 PE=1 SV=1	60.0	9.7	15.6 (M:15.6)
183	WNK4_HUMAN	Serine/threonine-protein kinase WNK4 OS=Homo sapiens GN=WNK4 PE=1 SV=1	134.7	5.2	15.6 (M:15.6)
184	SENP3_HUMAN	Sentrin-specific protease 3 OS=Homo sapiens GN=SENP3 PE=1 SV=2	65.0	9.7	15.6 (M:15.6)
185	EMC4_HUMAN	ER membrane protein complex subunit 4 OS=Homo sapiens GN=EMC4 PE=1 SV=2	20.1	9.7	15.5 (M:15.5)
186	TCPH_HUMAN	T-complex protein 1 subunit eta OS=Homo sapiens GN=CCT7 PE=1 SV=2	59.3	8.6	15.5 (M:15.5)
187	AZI2_HUMAN	5-azacytidine-induced protein 2 OS=Homo sapiens GN=AZI2 PE=1 SV=1	44.9	6.2	15.5 (M:15.5)
188	PTK7_HUMAN	Inactive tyrosine-protein kinase 7 OS=Homo sapiens GN=PTK7 PE=1 SV=2	118.3	6.7	15.4 (M:15.4)
189	OR2M4_HUMAN	Olfactory receptor 2M4 OS=Homo sapiens GN=OR2M4 PE=2 SV=2	35.0	9.7	15.3 (M:15.3)
190	IDHC_HUMAN	Isocitrate dehydrogenase [NADP] cytoplasmic OS=Homo sapiens GN=IDH1 PE=1 SV=2	46.6	6.6	15.3 (M:15.3)
191	IF5AL_HUMAN	Eukaryotic translation initiation factor 5A-1-like OS=Homo sapiens GN=EIF5AL1 PE=2 SV=2	16.8	4.7	15.3 (M:15.3)
192	DR9C7_HUMAN	Short-chain dehydrogenase/reductase family 9C member 7 OS=Homo sapiens GN=SDR9C7 PE=1 SV=1	35.2	9.9	15.3 (M:15.3)
193	HHLA2_HUMAN	HERV-H LTR-associating protein 2 OS=Homo sapiens GN=HHLA2 PE=1 SV=1	46.8	5.7	15.3 (M:15.3)
194	GBP6_HUMAN	Guanylate-binding protein 6 OS=Homo sapiens GN=GBP6 PE=2 SV=1	72.4	6.0	15.3 (M:15.3)
195	ENOX1_HUMAN	Ecto-NOX disulfide-thiol exchanger 1 OS=Homo sapiens GN=ENOX1 PE=1 SV=1	73.3	5.3	15.3 (M:15.3)
196	CSMD3_HUMAN	CUB and sushi domain-containing protein 3 OS=Homo sapiens GN=CSMD3 PE=2 SV=3	405.7	5.6	15.2 (M:15.2)
197	CCD57_HUMAN	Coiled-coil domain-containing protein 57 OS=Homo sapiens GN=CCDC57 PE=1 SV=2	103.1	6.1	15.2 (M:15.2)
198	GRP75_HUMAN	Stress-70 protein, mitochondrial OS=Homo sapiens GN=HSPA9 PE=1 SV=2	73.6	5.8	15.2 (M:15.2)
199	IQCD_HUMAN	IQ domain-containing protein D OS=Homo sapiens GN=IQCD PE=2 SV=2	52.3	9.8	15.1 (M:15.1)
200	EAF2_HUMAN	ELL-associated factor 2 OS=Homo sapiens GN=EAF2 PE=1 SV=1	28.8	4.9	15.1 (M:15.1)
201	RL8_HUMAN	60S ribosomal protein L8 OS=Homo sapiens GN=RPL8 PE=1 SV=2	28.0	11.9	15.1 (M:15.1)
202	S38AA_HUMAN	Putative sodium-coupled neutral amino acid transporter 10 OS=Homo sapiens GN=SLC38A10 PE=1 SV=2	119.7	5.4	15.1 (M:15.1)
203	NUAK1_HUMAN	NUAK family SNF1-like kinase 1 OS=Homo sapiens GN=NUAK1 PE=1 SV=1	74.3	9.6	15.0 (M:15.0)

## Sheet: MKL-2
Row	Accession	Protein	MW [kDa]	pI	Scores
1	H14_HUMAN	Histone H1.4 OS=Homo sapiens GN=HIST1H1E PE=1 SV=2	21.9	11.5	572.7 (M:572.7)
2	H2B1H_HUMAN	Histone H2B type 1-H OS=Homo sapiens GN=HIST1H2BH PE=1 SV=3	13.9	10.8	534.5 (M:534.5)
3	H4_HUMAN	Histone H4 OS=Homo sapiens GN=HIST1H4A PE=1 SV=2	11.4	11.8	426.9 (M:426.9)
4	H15_HUMAN	Histone H1.5 OS=Homo sapiens GN=HIST1H1B PE=1 SV=3	22.6	11.4	412.2 (M:412.2)
5	H2A1C_HUMAN	Histone H2A type 1-C OS=Homo sapiens GN=HIST1H2AC PE=1 SV=3	14.1	11.5	401.0 (M:401.0)
6	H2AJ_HUMAN	Histone H2A.J OS=Homo sapiens GN=H2AFJ PE=1 SV=1	14.0	11.4	351.7 (M:351.7)
7	FUBP2_HUMAN	Far upstream element-binding protein 2 OS=Homo sapiens GN=KHSRP PE=1 SV=4	73.1	7.0	270.2 (M:270.2)
8	TBB5_HUMAN	Tubulin beta chain OS=Homo sapiens GN=TUBB PE=1 SV=2	49.6	4.6	264.8 (M:264.8)
9	ACTB_HUMAN	Actin, cytoplasmic 1 OS=Homo sapiens GN=ACTB PE=1 SV=1	41.7	5.2	248.9 (M:248.9)
10	ROA1_HUMAN	Heterogeneous nuclear ribonucleoprotein A1 OS=Homo sapiens GN=HNRNPA1 PE=1 SV=5	38.7	9.6	221.9 (M:221.9)
11	HNRPD_HUMAN	Heterogeneous nuclear ribonucleoprotein D0 OS=Homo sapiens GN=HNRNPD PE=1 SV=1	38.4	8.5	206.5 (M:206.5)
12	EF1A1_HUMAN	Elongation factor 1-alpha 1 OS=Homo sapiens GN=EEF1A1 PE=1 SV=1	50.1	9.7	203.4 (M:203.4)
13	PRDX2_HUMAN	Peroxiredoxin-2 OS=Homo sapiens GN=PRDX2 PE=1 SV=5	21.9	5.6	165.4 (M:165.4)
14	H32_HUMAN	Histone H3.2 OS=Homo sapiens GN=HIST2H3A PE=1 SV=3	15.4	11.9	158.4 (M:158.4)
15	HNRPK_HUMAN	Heterogeneous nuclear ribonucleoprotein K OS=Homo sapiens GN=HNRNPK PE=1 SV=1	50.9	5.3	148.1 (M:148.1)
16	THOC4_HUMAN	THO complex subunit 4 OS=Homo sapiens GN=ALYREF PE=1 SV=3	26.9	11.6	143.1 (M:143.1)
17	COF1_HUMAN	Cofilin-1 OS=Homo sapiens GN=CFL1 PE=1 SV=3	18.5	9.1	140.3 (M:140.3)
18	HSPB1_HUMAN	Heat shock protein beta-1 OS=Homo sapiens GN=HSPB1 PE=1 SV=2	22.8	6.0	130.3 (M:130.3)
19	CH10_HUMAN	10 kDa heat shock protein, mitochondrial OS=Homo sapiens GN=HSPE1 PE=1 SV=2	10.9	9.4	129.0 (M:129.0)
20	K2C8_HUMAN	Keratin, type II cytoskeletal 8 OS=Homo sapiens GN=KRT8 PE=1 SV=7	53.7	5.4	123.9 (M:123.9)
21	KPYM_HUMAN	Pyruvate kinase PKM OS=Homo sapiens GN=PKM PE=1 SV=4	57.9	9.0	120.6 (M:120.6)
22	G3P_HUMAN	Glyceraldehyde-3-phosphate dehydrogenase OS=Homo sapiens GN=GAPDH PE=1 SV=3	36.0	9.3	117.6 (M:117.6)
23	LMNB1_HUMAN	Lamin-B1 OS=Homo sapiens GN=LMNB1 PE=1 SV=2	66.4	5.0	116.7 (M:116.7)
24	PABP3_HUMAN	Polyadenylate-binding protein 3 OS=Homo sapiens GN=PABPC3 PE=1 SV=2	70.0	10.2	116.7 (M:116.7)
25	ALBU_HUMAN	Serum albumin OS=Homo sapiens GN=ALB PE=1 SV=2	69.3	5.9	110.5 (M:110.5)
26	1433Z_HUMAN	14-3-3 protein zeta/delta OS=Homo sapiens GN=YWHAZ PE=1 SV=1	27.7	4.6	104.4 (M:104.4)
27	PPIA_HUMAN	Peptidyl-prolyl cis-trans isomerase A OS=Homo sapiens GN=PPIA PE=1 SV=2	18.0	9.0	102.1 (M:102.1)
28	APOC3_HUMAN	Apolipoprotein C-III OS=Homo sapiens GN=APOC3 PE=1 SV=1	10.8	5.1	101.8 (M:101.8)
29	LAP2B_HUMAN	Lamina-associated polypeptide 2, isoforms beta/gamma OS=Homo sapiens GN=TMPO PE=1 SV=2	50.6	9.8	101.1 (M:101.1)
30	GRP75_HUMAN	Stress-70 protein, mitochondrial OS=Homo sapiens GN=HSPA9 PE=1 SV=2	73.6	5.8	95.6 (M:95.6)
31	HBB_HUMAN	Hemoglobin subunit beta OS=Homo sapiens GN=HBB PE=1 SV=2	16.0	6.9	94.9 (M:94.9)
32	STMN1_HUMAN	Stathmin OS=Homo sapiens GN=STMN1 PE=1 SV=3	17.3	5.7	93.0 (M:93.0)
33	TBA1C_HUMAN	Tubulin alpha-1C chain OS=Homo sapiens GN=TUBA1C PE=1 SV=1	49.9	4.8	91.3 (M:91.3)
34	IBP2_HUMAN	Insulin-like growth factor-binding protein 2 OS=Homo sapiens GN=IGFBP2 PE=1 SV=2	34.8	8.9	87.6 (M:87.6)
35	TPM3_HUMAN	Tropomyosin alpha-3 chain OS=Homo sapiens GN=TPM3 PE=1 SV=2	32.9	4.5	86.1 (M:86.1)
36	SRSF3_HUMAN	Serine/arginine-rich splicing factor 3 OS=Homo sapiens GN=SRSF3 PE=1 SV=1	19.3	12.3	83.6 (M:83.6)
37	ROA3_HUMAN	Heterogeneous nuclear ribonucleoprotein A3 OS=Homo sapiens GN=HNRNPA3 PE=1 SV=2	39.6	9.6	77.9 (M:77.9)
38	SRSF5_HUMAN	Serine/arginine-rich splicing factor 5 OS=Homo sapiens GN=SRSF5 PE=1 SV=1	31.2	12.2	72.8 (M:72.8)
39	HBA_HUMAN	Hemoglobin subunit alpha OS=Homo sapiens GN=HBA1 PE=1 SV=2	15.2	9.4	65.2 (M:65.2)
40	SFPQ_HUMAN	Splicing factor, proline- and glutamine-rich OS=Homo sapiens GN=SFPQ PE=1 SV=2	76.1	9.9	65.1 (M:65.1)
41	SF01_HUMAN	Splicing factor 1 OS=Homo sapiens GN=SF1 PE=1 SV=4	68.3	9.7	62.3 (M:62.3)
42	HGB1A_HUMAN	Putative high mobility group protein B1-like 1 OS=Homo sapiens GN=HMGB1P1 PE=5 SV=1	24.2	5.9	61.1 (M:61.1)
43	MIF_HUMAN	Macrophage migration inhibitory factor OS=Homo sapiens GN=MIF PE=1 SV=4	12.5	9.1	59.4 (M:59.4)
44	DEK_HUMAN	Protein DEK OS=Homo sapiens GN=DEK PE=1 SV=1	42.6	9.4	55.6 (M:55.6)
45	CCER2_HUMAN	Coiled-coil domain-containing glutamate-rich protein 2 OS=Homo sapiens GN=CCER2 PE=3 SV=1	30.3	5.2	51.9 (M:51.9)
46	PRDX4_HUMAN	Peroxiredoxin-4 OS=Homo sapiens GN=PRDX4 PE=1 SV=1	30.5	5.8	48.1 (M:48.1)
47	TPM4_HUMAN	Tropomyosin alpha-4 chain OS=Homo sapiens GN=TPM4 PE=1 SV=3	28.5	4.5	47.3 (M:47.3)
48	LAMP1_HUMAN	Lysosome-associated membrane glycoprotein 1 OS=Homo sapiens GN=LAMP1 PE=1 SV=3	44.9	9.9	47.3 (M:47.3)
49	TRFL_HUMAN	Lactotransferrin OS=Homo sapiens GN=LTF PE=1 SV=6	78.1	9.6	44.0 (M:44.0)
50	RS28_HUMAN	40S ribosomal protein S28 OS=Homo sapiens GN=RPS28 PE=1 SV=1	7.8	11.6	43.4 (M:43.4)
51	PFD2_HUMAN	Prefoldin subunit 2 OS=Homo sapiens GN=PFDN2 PE=1 SV=1	16.6	6.2	42.3 (M:42.3)
52	MAP1B_HUMAN	Microtubule-associated protein 1B OS=Homo sapiens GN=MAP1B PE=1 SV=2	270.5	4.6	42.0 (M:42.0)
53	ERP29_HUMAN	Endoplasmic reticulum resident protein 29 OS=Homo sapiens GN=ERP29 PE=1 SV=4	29.0	7.5	41.7 (M:41.7)
54	LUZP1_HUMAN	Leucine zipper protein 1 OS=Homo sapiens GN=LUZP1 PE=1 SV=2	120.2	9.4	40.9 (M:40.9)
55	RL24_HUMAN	60S ribosomal protein L24 OS=Homo sapiens GN=RPL24 PE=1 SV=1	17.8	12.0	40.1 (M:40.1)
56	1433T_HUMAN	14-3-3 protein theta OS=Homo sapiens GN=YWHAQ PE=1 SV=1	27.7	4.5	39.5 (M:39.5)
57	RS12_HUMAN	40S ribosomal protein S12 OS=Homo sapiens GN=RPS12 PE=1 SV=3	14.5	7.7	39.4 (M:39.4)
58	CIRBP_HUMAN	Cold-inducible RNA-binding protein OS=Homo sapiens GN=CIRBP PE=1 SV=1	18.6	9.8	39.0 (M:39.0)
59	SARNP_HUMAN	SAP domain-containing ribonucleoprotein OS=Homo sapiens GN=SARNP PE=1 SV=3	23.7	6.1	36.9 (M:36.9)
60	ATPB_HUMAN	ATP synthase subunit beta, mitochondrial OS=Homo sapiens GN=ATP5B PE=1 SV=3	56.5	5.1	36.7 (M:36.7)
61	TOM7_HUMAN	Mitochondrial import receptor subunit TOM7 homolog OS=Homo sapiens GN=TOMM7 PE=1 SV=1	6.2	10.7	36.5 (M:36.5)
62	TRAP1_HUMAN	Heat shock protein 75 kDa, mitochondrial OS=Homo sapiens GN=TRAP1 PE=1 SV=3	80.1	9.0	35.7 (M:35.7)
63	OLIG1_HUMAN	Oligodendrocyte transcription factor 1 OS=Homo sapiens GN=OLIG1 PE=1 SV=2	27.9	10.5	32.2 (M:32.2)
64	KCRB_HUMAN	Creatine kinase B-type OS=Homo sapiens GN=CKB PE=1 SV=1	42.6	5.2	31.8 (M:31.8)
65	RS25_HUMAN	40S ribosomal protein S25 OS=Homo sapiens GN=RPS25 PE=1 SV=1	13.7	10.6	31.6 (M:31.6)
66	SRS12_HUMAN	Serine/arginine-rich splicing factor 12 OS=Homo sapiens GN=SRSF12 PE=2 SV=1	30.5	12.3	30.3 (M:30.3)
67	NPM_HUMAN	Nucleophosmin OS=Homo sapiens GN=NPM1 PE=1 SV=2	32.6	4.5	30.0 (M:30.0)
68	YP023_HUMAN	Putative uncharacterized protein FLJ34945 OS=Homo sapiens PE=2 SV=1	14.2	12.6	29.6 (M:29.6)
69	MYH9_HUMAN	Myosin-9 OS=Homo sapiens GN=MYH9 PE=1 SV=4	226.4	5.4	29.6 (M:29.6)
70	ATPA_HUMAN	ATP synthase subunit alpha, mitochondrial OS=Homo sapiens GN=ATP5A1 PE=1 SV=1	59.7	9.6	28.2 (M:28.2)
71	ZBED4_HUMAN	Zinc finger BED domain-containing protein 4 OS=Homo sapiens GN=ZBED4 PE=1 SV=2	130.2	6.4	26.2 (M:26.2)
72	PFD6_HUMAN	Prefoldin subunit 6 OS=Homo sapiens GN=PFDN6 PE=1 SV=1	14.6	9.4	25.5 (M:25.5)
73	HNRPM_HUMAN	Heterogeneous nuclear ribonucleoprotein M OS=Homo sapiens GN=HNRNPM PE=1 SV=3	77.5	9.6	25.4 (M:25.4)
74	PDIA3_HUMAN	Protein disulfide-isomerase A3 OS=Homo sapiens GN=PDIA3 PE=1 SV=4	56.7	5.9	25.3 (M:25.3)
75	PARK7_HUMAN	Protein deglycase DJ-1 OS=Homo sapiens GN=PARK7 PE=1 SV=2	19.9	6.4	25.0 (M:25.0)
76	SERA_HUMAN	D-3-phosphoglycerate dehydrogenase OS=Homo sapiens GN=PHGDH PE=1 SV=4	56.6	6.3	24.9 (M:24.9)
77	MTOR_HUMAN	Serine/threonine-protein kinase mTOR OS=Homo sapiens GN=MTOR PE=1 SV=1	288.7	6.8	24.6 (M:24.6)
78	QCR7_HUMAN	Cytochrome b-c1 complex subunit 7 OS=Homo sapiens GN=UQCRB PE=1 SV=2	13.5	9.2	24.1 (M:24.1)
79	CECR1_HUMAN	Adenosine deaminase CECR1 OS=Homo sapiens GN=CECR1 PE=1 SV=2	58.9	8.6	23.5 (M:23.5)
80	RL35_HUMAN	60S ribosomal protein L35 OS=Homo sapiens GN=RPL35 PE=1 SV=2	14.5	11.5	22.8 (M:22.8)
81	NONO_HUMAN	Non-POU domain-containing octamer-binding protein OS=Homo sapiens GN=NONO PE=1 SV=4	54.2	9.6	22.6 (M:22.6)
82	ABCAC_HUMAN	ATP-binding cassette sub-family A member 12 OS=Homo sapiens GN=ABCA12 PE=1 SV=3	293.0	8.6	22.4 (M:22.4)
83	HNRPU_HUMAN	Heterogeneous nuclear ribonucleoprotein U OS=Homo sapiens GN=HNRNPU PE=1 SV=6	90.5	5.7	22.3 (M:22.3)
84	ENY2_HUMAN	Transcription and mRNA export factor ENY2 OS=Homo sapiens GN=ENY2 PE=1 SV=1	11.5	10.2	21.4 (M:21.4)
85	RL30_HUMAN	60S ribosomal protein L30 OS=Homo sapiens GN=RPL30 PE=1 SV=2	12.8	10.2	20.5 (M:20.5)
86	RL8_HUMAN	60S ribosomal protein L8 OS=Homo sapiens GN=RPL8 PE=1 SV=2	28.0	11.9	20.5 (M:20.5)
87	OFUT1_HUMAN	GDP-fucose protein O-fucosyltransferase 1 OS=Homo sapiens GN=POFUT1 PE=1 SV=1	43.9	9.5	20.4 (M:20.4)
88	CI163_HUMAN	Uncharacterized protein C9orf163 OS=Homo sapiens GN=C9orf163 PE=2 SV=1	22.1	12.9	20.4 (M:20.4)
89	SRSF1_HUMAN	Serine/arginine-rich splicing factor 1 OS=Homo sapiens GN=SRSF1 PE=1 SV=2	27.7	10.8	20.2 (M:20.2)
90	SRSF9_HUMAN	Serine/arginine-rich splicing factor 9 OS=Homo sapiens GN=SRSF9 PE=1 SV=1	25.5	9.2	20.2 (M:20.2)
91	IF4A1_HUMAN	Eukaryotic initiation factor 4A-I OS=Homo sapiens GN=EIF4A1 PE=1 SV=1	46.1	5.2	20.1 (M:20.1)
92	WNK4_HUMAN	Serine/threonine-protein kinase WNK4 OS=Homo sapiens GN=WNK4 PE=1 SV=1	134.7	5.2	20.0 (M:20.0)
93	KDM2A_HUMAN	Lysine-specific demethylase 2A OS=Homo sapiens GN=KDM2A PE=1 SV=3	132.7	8.8	19.9 (M:19.9)
94	SNN_HUMAN	Stannin OS=Homo sapiens GN=SNN PE=1 SV=1	9.5	5.2	19.4 (M:19.4)
95	DPY30_HUMAN	Protein dpy-30 homolog OS=Homo sapiens GN=DPY30 PE=1 SV=1	11.2	4.7	19.3 (M:19.3)
96	TESK1_HUMAN	Dual specificity testis-specific protein kinase 1 OS=Homo sapiens GN=TESK1 PE=1 SV=2	67.6	9.7	19.1 (M:19.1)
97	DOT1L_HUMAN	Histone-lysine N-methyltransferase, H3 lysine-79 specific OS=Homo sapiens GN=DOT1L PE=1 SV=2	184.7	10.0	19.0 (M:19.0)
98	LDH6A_HUMAN	L-lactate dehydrogenase A-like 6A OS=Homo sapiens GN=LDHAL6A PE=2 SV=1	36.5	6.6	18.9 (M:18.9)
99	MYO9A_HUMAN	Unconventional myosin-IXa OS=Homo sapiens GN=MYO9A PE=1 SV=2	292.5	9.7	18.8 (M:18.8)
100	CP250_HUMAN	Centrosome-associated protein CEP250 OS=Homo sapiens GN=CEP250 PE=1 SV=2	281.0	4.9	18.7 (M:18.7)
101	ZN788_HUMAN	Zinc finger protein 788 OS=Homo sapiens GN=ZNF788 PE=2 SV=2	71.9	10.6	18.6 (M:18.6)
102	DAPK3_HUMAN	Death-associated protein kinase 3 OS=Homo sapiens GN=DAPK3 PE=1 SV=1	52.5	6.5	18.4 (M:18.4)
103	KAPCG_HUMAN	cAMP-dependent protein kinase catalytic subunit gamma OS=Homo sapiens GN=PRKACG PE=1 SV=3	40.4	9.3	18.3 (M:18.3)
104	Z280D_HUMAN	Zinc finger protein 280D OS=Homo sapiens GN=ZNF280D PE=1 SV=3	109.2	9.5	18.2 (M:18.2)
105	FCERG_HUMAN	High affinity immunoglobulin epsilon receptor subunit gamma OS=Homo sapiens GN=FCER1G PE=1 SV=1	9.7	7.5	18.1 (M:18.1)
106	CPSF1_HUMAN	Cleavage and polyadenylation specificity factor subunit 1 OS=Homo sapiens GN=CPSF1 PE=1 SV=2	160.8	6.0	17.7 (M:17.7)
107	GNA13_HUMAN	Guanine nucleotide-binding protein subunit alpha-13 OS=Homo sapiens GN=GNA13 PE=1 SV=2	44.0	9.1	17.5 (M:17.5)
108	RAB32_HUMAN	Ras-related protein Rab-32 OS=Homo sapiens GN=RAB32 PE=1 SV=3	25.0	6.1	17.4 (M:17.4)
109	VDR_HUMAN	Vitamin D3 receptor OS=Homo sapiens GN=VDR PE=1 SV=1	48.3	6.1	17.3 (M:17.3)
110	SPEG_HUMAN	Striated muscle preferentially expressed protein kinase OS=Homo sapiens GN=SPEG PE=1 SV=4	354.1	9.7	17.3 (M:17.3)
111	DJB14_HUMAN	DnaJ homolog subfamily B member 14 OS=Homo sapiens GN=DNAJB14 PE=1 SV=1	42.5	9.5	17.2 (M:17.2)
112	SPAG5_HUMAN	Sperm-associated antigen 5 OS=Homo sapiens GN=SPAG5 PE=1 SV=2	134.3	4.8	17.2 (M:17.2)
113	RB12B_HUMAN	RNA-binding protein 12B OS=Homo sapiens GN=RBM12B PE=1 SV=2	118.0	6.3	16.9 (M:16.9)
114	VPS8_HUMAN	Vacuolar protein sorting-associated protein 8 homolog OS=Homo sapiens GN=VPS8 PE=1 SV=3	161.7	5.3	16.8 (M:16.8)
115	PAR12_HUMAN	Poly [ADP-ribose] polymerase 12 OS=Homo sapiens GN=PARP12 PE=1 SV=1	79.0	9.8	16.7 (M:16.7)
116	MDM1_HUMAN	Nuclear protein MDM1 OS=Homo sapiens GN=MDM1 PE=1 SV=2	80.7	9.7	16.7 (M:16.7)
117	NCF4_HUMAN	Neutrophil cytosol factor 4 OS=Homo sapiens GN=NCF4 PE=1 SV=2	39.0	6.5	16.7 (M:16.7)
118	D2HDH_HUMAN	D-2-hydroxyglutarate dehydrogenase, mitochondrial OS=Homo sapiens GN=D2HGDH PE=1 SV=3	56.4	9.3	16.6 (M:16.6)
119	CQ047_HUMAN	Uncharacterized protein C17orf47 OS=Homo sapiens GN=C17orf47 PE=2 SV=3	63.1	9.9	16.5 (M:16.5)
120	PTF1A_HUMAN	Pancreas transcription factor 1 subunit alpha OS=Homo sapiens GN=PTF1A PE=1 SV=1	34.9	5.0	16.5 (M:16.5)
121	MOS_HUMAN	Proto-oncogene serine/threonine-protein kinase mos OS=Homo sapiens GN=MOS PE=1 SV=1	37.8	10.1	16.4 (M:16.4)
122	ITPR2_HUMAN	Inositol 1,4,5-trisphosphate receptor type 2 OS=Homo sapiens GN=ITPR2 PE=1 SV=2	307.9	6.0	16.4 (M:16.4)
123	SI1L2_HUMAN	Signal-induced proliferation-associated 1-like protein 2 OS=Homo sapiens GN=SIPA1L2 PE=1 SV=2	190.3	6.3	16.4 (M:16.4)
124	RGPS1_HUMAN	Ras-specific guanine nucleotide-releasing factor RalGPS1 OS=Homo sapiens GN=RALGPS1 PE=1 SV=1	62.1	9.8	16.4 (M:16.4)
125	MFRN1_HUMAN	Mitoferrin-1 OS=Homo sapiens GN=SLC25A37 PE=2 SV=2	37.3	9.8	16.3 (M:16.3)
126	ZZEF1_HUMAN	Zinc finger ZZ-type and EF-hand domain-containing protein 1 OS=Homo sapiens GN=ZZEF1 PE=1 SV=6	330.9	5.6	16.3 (M:16.3)
127	KGP1_HUMAN	cGMP-dependent protein kinase 1 OS=Homo sapiens GN=PRKG1 PE=1 SV=3	76.3	5.7	16.2 (M:16.2)
128	MAK_HUMAN	Serine/threonine-protein kinase MAK OS=Homo sapiens GN=MAK PE=1 SV=2	70.5	10.1	16.2 (M:16.2)
129	UBA7_HUMAN	Ubiquitin-like modifier-activating enzyme 7 OS=Homo sapiens GN=UBA7 PE=1 SV=2	111.6	5.6	15.9 (M:15.9)
130	CMGA_HUMAN	Chromogranin-A OS=Homo sapiens GN=CHGA PE=1 SV=7	50.7	4.4	15.9 (M:15.9)
131	TCPH_HUMAN	T-complex protein 1 subunit eta OS=Homo sapiens GN=CCT7 PE=1 SV=2	59.3	8.6	15.8 (M:15.8)
132	MOV10_HUMAN	Putative helicase MOV-10 OS=Homo sapiens GN=MOV10 PE=1 SV=2	113.6	9.7	15.8 (M:15.8)
133	ADT2_HUMAN	ADP/ATP translocase 2 OS=Homo sapiens GN=SLC25A5 PE=1 SV=7	32.8	10.2	15.7 (M:15.7)
134	CH60_HUMAN	60 kDa heat shock protein, mitochondrial OS=Homo sapiens GN=HSPD1 PE=1 SV=2	61.0	5.6	15.7 (M:15.7)
135	OR2M7_HUMAN	Olfactory receptor 2M7 OS=Homo sapiens GN=OR2M7 PE=2 SV=1	34.9	8.8	15.6 (M:15.6)
136	ABCBA_HUMAN	ATP-binding cassette sub-family B member 10, mitochondrial OS=Homo sapiens GN=ABCB10 PE=1 SV=2	79.1	10.5	15.5 (M:15.5)
137	CPSM_HUMAN	Carbamoyl-phosphate synthase [ammonia], mitochondrial OS=Homo sapiens GN=CPS1 PE=1 SV=2	164.8	6.3	15.4 (M:15.4)
138	LMNA_HUMAN	Prelamin-A/C OS=Homo sapiens GN=LMNA PE=1 SV=1	74.1	6.6	15.4 (M:15.4)
139	ABCC8_HUMAN	ATP-binding cassette sub-family C member 8 OS=Homo sapiens GN=ABCC8 PE=1 SV=6	176.9	8.9	15.2 (M:15.2)
140	RNF8_HUMAN	E3 ubiquitin-protein ligase RNF8 OS=Homo sapiens GN=RNF8 PE=1 SV=1	55.5	7.8	15.1 (M:15.1)
141	SNPC1_HUMAN	snRNA-activating protein complex subunit 1 OS=Homo sapiens GN=SNAPC1 PE=1 SV=1	43.0	10.1	15.0 (M:15.0)

## Sheet: PeTa
Row	Accession	Protein	MW [kDa]	pI	Scores
1	H2B1C_HUMAN	Histone H2B type 1-C/E/F/G/I OS=Homo sapiens GN=HIST1H2BC PE=1 SV=4	13.9	10.8	1035.7 (M:1035.7)
2	H2B2F_HUMAN	Histone H2B type 2-F OS=Homo sapiens GN=HIST2H2BF PE=1 SV=3	13.9	10.8	1019.4 (M:1019.4)
3	H2B1D_HUMAN	Histone H2B type 1-D OS=Homo sapiens GN=HIST1H2BD PE=1 SV=2	13.9	10.8	1004.3 (M:1004.3)
4	H2B1K_HUMAN	Histone H2B type 1-K OS=Homo sapiens GN=HIST1H2BK PE=1 SV=3	13.9	10.8	931.6 (M:931.6)
5	H15_HUMAN	Histone H1.5 OS=Homo sapiens GN=HIST1H1B PE=1 SV=3	22.6	11.4	655.1 (M:655.1)
6	H14_HUMAN	Histone H1.4 OS=Homo sapiens GN=HIST1H1E PE=1 SV=2	21.9	11.5	582.4 (M:582.4)
7	ROA1_HUMAN	Heterogeneous nuclear ribonucleoprotein A1 OS=Homo sapiens GN=HNRNPA1 PE=1 SV=5	38.7	9.6	431.0 (M:431.0)
8	H4_HUMAN	Histone H4 OS=Homo sapiens GN=HIST1H4A PE=1 SV=2	11.4	11.8	383.6 (M:383.6)
9	TBB5_HUMAN	Tubulin beta chain OS=Homo sapiens GN=TUBB PE=1 SV=2	49.6	4.6	375.2 (M:375.2)
10	H2AJ_HUMAN	Histone H2A.J OS=Homo sapiens GN=H2AFJ PE=1 SV=1	14.0	11.4	351.3 (M:351.3)
11	H2A1C_HUMAN	Histone H2A type 1-C OS=Homo sapiens GN=HIST1H2AC PE=1 SV=3	14.1	11.5	341.6 (M:341.6)
12	TBA1B_HUMAN	Tubulin alpha-1B chain OS=Homo sapiens GN=TUBA1B PE=1 SV=1	50.1	4.8	304.0 (M:304.0)
13	HNRPK_HUMAN	Heterogeneous nuclear ribonucleoprotein K OS=Homo sapiens GN=HNRNPK PE=1 SV=1	50.9	5.3	254.0 (M:254.0)
14	TBA4A_HUMAN	Tubulin alpha-4A chain OS=Homo sapiens GN=TUBA4A PE=1 SV=1	49.9	4.8	241.6 (M:241.6)
15	H33_HUMAN	Histone H3.3 OS=Homo sapiens GN=H3F3A PE=1 SV=2	15.3	11.9	235.7 (M:235.7)
16	HNRPD_HUMAN	Heterogeneous nuclear ribonucleoprotein D0 OS=Homo sapiens GN=HNRNPD PE=1 SV=1	38.4	8.5	201.5 (M:201.5)
17	ACTB_HUMAN	Actin, cytoplasmic 1 OS=Homo sapiens GN=ACTB PE=1 SV=1	41.7	5.2	196.0 (M:196.0)
18	ALBU_HUMAN	Serum albumin OS=Homo sapiens GN=ALB PE=1 SV=2	69.3	5.9	173.3 (M:173.3)
19	COF1_HUMAN	Cofilin-1 OS=Homo sapiens GN=CFL1 PE=1 SV=3	18.5	9.1	173.2 (M:173.2)
20	FUBP2_HUMAN	Far upstream element-binding protein 2 OS=Homo sapiens GN=KHSRP PE=1 SV=4	73.1	7.0	167.6 (M:167.6)
21	SRSF1_HUMAN	Serine/arginine-rich splicing factor 1 OS=Homo sapiens GN=SRSF1 PE=1 SV=2	27.7	10.8	160.9 (M:160.9)
22	SRSF3_HUMAN	Serine/arginine-rich splicing factor 3 OS=Homo sapiens GN=SRSF3 PE=1 SV=1	19.3	12.3	159.5 (M:159.5)
23	PPIA_HUMAN	Peptidyl-prolyl cis-trans isomerase A OS=Homo sapiens GN=PPIA PE=1 SV=2	18.0	9.0	146.0 (M:146.0)
24	DPY30_HUMAN	Protein dpy-30 homolog OS=Homo sapiens GN=DPY30 PE=1 SV=1	11.2	4.7	145.0 (M:145.0)
25	ROA3_HUMAN	Heterogeneous nuclear ribonucleoprotein A3 OS=Homo sapiens GN=HNRNPA3 PE=1 SV=2	39.6	9.6	122.3 (M:122.3)
26	NPM_HUMAN	Nucleophosmin OS=Homo sapiens GN=NPM1 PE=1 SV=2	32.6	4.5	112.4 (M:112.4)
27	THOC4_HUMAN	THO complex subunit 4 OS=Homo sapiens GN=ALYREF PE=1 SV=3	26.9	11.6	108.0 (M:108.0)
28	STMN1_HUMAN	Stathmin OS=Homo sapiens GN=STMN1 PE=1 SV=3	17.3	5.7	105.3 (M:105.3)
29	MIF_HUMAN	Macrophage migration inhibitory factor OS=Homo sapiens GN=MIF PE=1 SV=4	12.5	9.1	105.1 (M:105.1)
30	SFPQ_HUMAN	Splicing factor, proline- and glutamine-rich OS=Homo sapiens GN=SFPQ PE=1 SV=2	76.1	9.9	103.8 (M:103.8)
31	HNRPU_HUMAN	Heterogeneous nuclear ribonucleoprotein U OS=Homo sapiens GN=HNRNPU PE=1 SV=6	90.5	5.7	96.9 (M:96.9)
32	SRP14_HUMAN	Signal recognition particle 14 kDa protein OS=Homo sapiens GN=SRP14 PE=1 SV=2	14.6	10.6	96.6 (M:96.6)
33	LAP2B_HUMAN	Lamina-associated polypeptide 2, isoforms beta/gamma OS=Homo sapiens GN=TMPO PE=1 SV=2	50.6	9.8	95.1 (M:95.1)
34	MATR3_HUMAN	Matrin-3 OS=Homo sapiens GN=MATR3 PE=1 SV=2	94.6	5.8	93.8 (M:93.8)
35	ROAA_HUMAN	Heterogeneous nuclear ribonucleoprotein A/B OS=Homo sapiens GN=HNRNPAB PE=1 SV=2	36.2	8.8	92.4 (M:92.4)
36	HBB_HUMAN	Hemoglobin subunit beta OS=Homo sapiens GN=HBB PE=1 SV=2	16.0	6.9	88.6 (M:88.6)
37	EF1A1_HUMAN	Elongation factor 1-alpha 1 OS=Homo sapiens GN=EEF1A1 PE=1 SV=1	50.1	9.7	88.3 (M:88.3)
38	RBMX_HUMAN	RNA-binding motif protein, X chromosome OS=Homo sapiens GN=RBMX PE=1 SV=3	42.3	0.0	86.6 (M:86.6)
39	PRDX2_HUMAN	Peroxiredoxin-2 OS=Homo sapiens GN=PRDX2 PE=1 SV=5	21.9	5.6	86.4 (M:86.4)
40	ROA2_HUMAN	Heterogeneous nuclear ribonucleoproteins A2/B1 OS=Homo sapiens GN=HNRNPA2B1 PE=1 SV=2	37.4	9.3	85.4 (M:85.4)
41	RS5_HUMAN	40S ribosomal protein S5 OS=Homo sapiens GN=RPS5 PE=1 SV=4	22.9	10.4	85.4 (M:85.4)
42	SRSF2_HUMAN	Serine/arginine-rich splicing factor 2 OS=Homo sapiens GN=SRSF2 PE=1 SV=4	25.5	12.4	84.0 (M:84.0)
43	CO4B_HUMAN	Complement C4-B OS=Homo sapiens GN=C4B PE=1 SV=2	192.6	7.0	72.9 (M:72.9)
44	CBX3_HUMAN	Chromobox protein homolog 3 OS=Homo sapiens GN=CBX3 PE=1 SV=4	20.8	5.1	70.1 (M:70.1)
45	SRS10_HUMAN	Serine/arginine-rich splicing factor 10 OS=Homo sapiens GN=SRSF10 PE=1 SV=1	31.3	11.8	67.4 (M:67.4)
46	HBA_HUMAN	Hemoglobin subunit alpha OS=Homo sapiens GN=HBA1 PE=1 SV=2	15.2	9.4	62.2 (M:62.2)
47	DDX5_HUMAN	Probable ATP-dependent RNA helicase DDX5 OS=Homo sapiens GN=DDX5 PE=1 SV=1	69.1	9.7	60.0 (M:60.0)
48	SRSF5_HUMAN	Serine/arginine-rich splicing factor 5 OS=Homo sapiens GN=SRSF5 PE=1 SV=1	31.2	12.2	58.4 (M:58.4)
49	RL6_HUMAN	60S ribosomal protein L6 OS=Homo sapiens GN=RPL6 PE=1 SV=3	32.7	11.1	55.0 (M:55.0)
50	BAF_HUMAN	Barrier-to-autointegration factor OS=Homo sapiens GN=BANF1 PE=1 SV=1	10.1	5.8	55.0 (M:55.0)
51	HNRPM_HUMAN	Heterogeneous nuclear ribonucleoprotein M OS=Homo sapiens GN=HNRNPM PE=1 SV=3	77.5	9.6	54.1 (M:54.1)
52	HMGN2_HUMAN	Non-histone chromosomal protein HMG-17 OS=Homo sapiens GN=HMGN2 PE=1 SV=3	9.4	10.5	52.8 (M:52.8)
53	TFAM_HUMAN	Transcription factor A, mitochondrial OS=Homo sapiens GN=TFAM PE=1 SV=1	29.1	10.3	51.5 (M:51.5)
54	CMGA_HUMAN	Chromogranin-A OS=Homo sapiens GN=CHGA PE=1 SV=7	50.7	4.4	51.1 (M:51.1)
55	NONO_HUMAN	Non-POU domain-containing octamer-binding protein OS=Homo sapiens GN=NONO PE=1 SV=4	54.2	9.6	50.8 (M:50.8)
56	HNRPF_HUMAN	Heterogeneous nuclear ribonucleoprotein F OS=Homo sapiens GN=HNRNPF PE=1 SV=3	45.6	5.3	50.2 (M:50.2)
57	HNRPL_HUMAN	Heterogeneous nuclear ribonucleoprotein L OS=Homo sapiens GN=HNRNPL PE=1 SV=2	64.1	9.2	49.5 (M:49.5)
58	RL30_HUMAN	60S ribosomal protein L30 OS=Homo sapiens GN=RPL30 PE=1 SV=2	12.8	10.2	47.0 (M:47.0)
59	RS12_HUMAN	40S ribosomal protein S12 OS=Homo sapiens GN=RPS12 PE=1 SV=3	14.5	7.7	46.7 (M:46.7)
60	SARNP_HUMAN	SAP domain-containing ribonucleoprotein OS=Homo sapiens GN=SARNP PE=1 SV=3	23.7	6.1	46.4 (M:46.4)
61	CH60_HUMAN	60 kDa heat shock protein, mitochondrial OS=Homo sapiens GN=HSPD1 PE=1 SV=2	61.0	5.6	46.0 (M:46.0)
62	TKNK_HUMAN	Tachykinin-3 OS=Homo sapiens GN=TAC3 PE=1 SV=1	13.4	7.7	45.7 (M:45.7)
63	TRFL_HUMAN	Lactotransferrin OS=Homo sapiens GN=LTF PE=1 SV=6	78.1	9.6	45.6 (M:45.6)
64	PSIP1_HUMAN	PC4 and SFRS1-interacting protein OS=Homo sapiens GN=PSIP1 PE=1 SV=1	60.1	9.7	45.5 (M:45.5)
65	G3BP1_HUMAN	Ras GTPase-activating protein-binding protein 1 OS=Homo sapiens GN=G3BP1 PE=1 SV=1	52.1	5.3	42.2 (M:42.2)
66	NDUB1_HUMAN	NADH dehydrogenase [ubiquinone] 1 beta subcomplex subunit 1 OS=Homo sapiens GN=NDUFB1 PE=1 SV=1	7.0	9.9	41.9 (M:41.9)
67	DUT_HUMAN	Deoxyuridine 5'-triphosphate nucleotidohydrolase, mitochondrial OS=Homo sapiens GN=DUT PE=1 SV=4	26.5	10.2	40.2 (M:40.2)
68	AKTIP_HUMAN	AKT-interacting protein OS=Homo sapiens GN=AKTIP PE=1 SV=1	33.1	9.8	40.1 (M:40.1)
69	HNRPQ_HUMAN	Heterogeneous nuclear ribonucleoprotein Q OS=Homo sapiens GN=SYNCRIP PE=1 SV=2	69.6	9.1	39.1 (M:39.1)
70	PRDX5_HUMAN	Peroxiredoxin-5, mitochondrial OS=Homo sapiens GN=PRDX5 PE=1 SV=4	22.1	9.9	37.9 (M:37.9)
71	CH10_HUMAN	10 kDa heat shock protein, mitochondrial OS=Homo sapiens GN=HSPE1 PE=1 SV=2	10.9	9.4	36.4 (M:36.4)
72	OFUT1_HUMAN	GDP-fucose protein O-fucosyltransferase 1 OS=Homo sapiens GN=POFUT1 PE=1 SV=1	43.9	9.5	36.0 (M:36.0)
73	PIMT_HUMAN	Protein-L-isoaspartate(D-aspartate) O-methyltransferase OS=Homo sapiens GN=PCMT1 PE=1 SV=4	24.6	6.9	35.9 (M:35.9)
74	GRP75_HUMAN	Stress-70 protein, mitochondrial OS=Homo sapiens GN=HSPA9 PE=1 SV=2	73.6	5.8	35.2 (M:35.2)
75	LUZP1_HUMAN	Leucine zipper protein 1 OS=Homo sapiens GN=LUZP1 PE=1 SV=2	120.2	9.4	35.1 (M:35.1)
76	ZBED4_HUMAN	Zinc finger BED domain-containing protein 4 OS=Homo sapiens GN=ZBED4 PE=1 SV=2	130.2	6.4	35.1 (M:35.1)
77	DYH3_HUMAN	Dynein heavy chain 3, axonemal OS=Homo sapiens GN=DNAH3 PE=2 SV=1	470.5	6.0	34.3 (M:34.3)
78	RL23A_HUMAN	60S ribosomal protein L23a OS=Homo sapiens GN=RPL23A PE=1 SV=1	17.7	10.9	32.8 (M:32.8)
79	OLIG1_HUMAN	Oligodendrocyte transcription factor 1 OS=Homo sapiens GN=OLIG1 PE=1 SV=2	27.9	10.5	32.5 (M:32.5)
80	NUMA1_HUMAN	Nuclear mitotic apparatus protein 1 OS=Homo sapiens GN=NUMA1 PE=1 SV=2	238.1	5.5	31.6 (M:31.6)
81	SRSF9_HUMAN	Serine/arginine-rich splicing factor 9 OS=Homo sapiens GN=SRSF9 PE=1 SV=1	25.5	9.2	30.9 (M:30.9)
82	MTOR_HUMAN	Serine/threonine-protein kinase mTOR OS=Homo sapiens GN=MTOR PE=1 SV=1	288.7	6.8	29.2 (M:29.2)
83	UCHL1_HUMAN	Ubiquitin carboxyl-terminal hydrolase isozyme L1 OS=Homo sapiens GN=UCHL1 PE=1 SV=2	24.8	5.2	28.8 (M:28.8)
84	SNX4_HUMAN	Sorting nexin-4 OS=Homo sapiens GN=SNX4 PE=1 SV=1	51.9	5.6	27.5 (M:27.5)
85	TCP4_HUMAN	Activated RNA polymerase II transcriptional coactivator p15 OS=Homo sapiens GN=SUB1 PE=1 SV=3	14.4	10.1	27.4 (M:27.4)
86	K0907_HUMAN	UPF0469 protein KIAA0907 OS=Homo sapiens GN=KIAA0907 PE=1 SV=1	64.8	9.4	26.9 (M:26.9)
87	MOS_HUMAN	Proto-oncogene serine/threonine-protein kinase mos OS=Homo sapiens GN=MOS PE=1 SV=1	37.8	10.1	25.5 (M:25.5)
88	CECR1_HUMAN	Adenosine deaminase CECR1 OS=Homo sapiens GN=CECR1 PE=1 SV=2	58.9	8.6	25.4 (M:25.4)
89	YO028_HUMAN	Putative uncharacterized protein LOC100506887 OS=Homo sapiens PE=5 SV=2	14.6	8.8	25.2 (M:25.2)
90	FUS_HUMAN	RNA-binding protein FUS OS=Homo sapiens GN=FUS PE=1 SV=1	53.4	9.7	24.4 (M:24.4)
91	PCBP1_HUMAN	Poly(rC)-binding protein 1 OS=Homo sapiens GN=PCBP1 PE=1 SV=2	37.5	6.8	23.2 (M:23.2)
92	AKIP1_HUMAN	A-kinase-interacting protein 1 OS=Homo sapiens GN=AKIP1 PE=1 SV=2	23.1	9.2	22.6 (M:22.6)
93	41_HUMAN	Protein 4.1 OS=Homo sapiens GN=EPB41 PE=1 SV=4	97.0	5.3	21.8 (M:21.8)
94	POP7_HUMAN	Ribonuclease P protein subunit p20 OS=Homo sapiens GN=POP7 PE=1 SV=2	15.6	9.9	21.8 (M:21.8)
95	CI163_HUMAN	Uncharacterized protein C9orf163 OS=Homo sapiens GN=C9orf163 PE=2 SV=1	22.1	12.9	20.7 (M:20.7)
96	TICRR_HUMAN	Treslin OS=Homo sapiens GN=TICRR PE=1 SV=2	210.7	9.8	20.1 (M:20.1)
97	TCPH_HUMAN	T-complex protein 1 subunit eta OS=Homo sapiens GN=CCT7 PE=1 SV=2	59.3	8.6	20.0 (M:20.0)
98	SRG2B_HUMAN	SLIT-ROBO Rho GTPase-activating protein 2B OS=Homo sapiens GN=SRGAP2B PE=3 SV=1	53.4	6.5	19.8 (M:19.8)
99	ACOXL_HUMAN	Acyl-coenzyme A oxidase-like protein OS=Homo sapiens GN=ACOXL PE=2 SV=3	61.8	9.5	19.6 (M:19.6)
100	AIFM3_HUMAN	Apoptosis-inducing factor 3 OS=Homo sapiens GN=AIFM3 PE=1 SV=1	66.7	9.9	19.0 (M:19.0)
101	JPH1_HUMAN	Junctophilin-1 OS=Homo sapiens GN=JPH1 PE=1 SV=2	71.6	9.9	18.8 (M:18.8)
102	SPYA_HUMAN	Serine--pyruvate aminotransferase OS=Homo sapiens GN=AGXT PE=1 SV=1	43.0	9.4	18.7 (M:18.7)
103	TCF19_HUMAN	Transcription factor 19 OS=Homo sapiens GN=TCF19 PE=1 SV=2	37.2	8.7	18.6 (M:18.6)
104	PRDM2_HUMAN	PR domain zinc finger protein 2 OS=Homo sapiens GN=PRDM2 PE=1 SV=3	188.8	7.2	18.6 (M:18.6)
105	CQ047_HUMAN	Uncharacterized protein C17orf47 OS=Homo sapiens GN=C17orf47 PE=2 SV=3	63.1	9.9	18.5 (M:18.5)
106	OMGP_HUMAN	Oligodendrocyte-myelin glycoprotein OS=Homo sapiens GN=OMG PE=1 SV=2	49.6	9.0	18.4 (M:18.4)
107	THS7B_HUMAN	Thrombospondin type-1 domain-containing protein 7B OS=Homo sapiens GN=THSD7B PE=2 SV=2	179.3	9.4	18.4 (M:18.4)
108	DNLI3_HUMAN	DNA ligase 3 OS=Homo sapiens GN=LIG3 PE=1 SV=2	112.8	10.0	18.0 (M:18.0)
109	CS044_HUMAN	Uncharacterized protein C19orf44 OS=Homo sapiens GN=C19orf44 PE=1 SV=1	71.3	5.4	18.0 (M:18.0)
110	ERG7_HUMAN	Lanosterol synthase OS=Homo sapiens GN=LSS PE=1 SV=1	83.3	6.2	18.0 (M:18.0)
111	MYO3B_HUMAN	Myosin-IIIb OS=Homo sapiens GN=MYO3B PE=2 SV=4	151.7	9.2	17.9 (M:17.9)
112	INT7_HUMAN	Integrator complex subunit 7 OS=Homo sapiens GN=INTS7 PE=1 SV=1	106.8	9.2	17.8 (M:17.8)
113	WHAMM_HUMAN	WASP homolog-associated protein with actin, membranes and microtubules OS=Homo sapiens GN=WHAMM PE=1 SV=2	90.9	6.7	17.8 (M:17.8)
114	CAD23_HUMAN	Cadherin-23 OS=Homo sapiens GN=CDH23 PE=1 SV=2	369.3	4.4	17.6 (M:17.6)
115	LTN1_HUMAN	E3 ubiquitin-protein ligase listerin OS=Homo sapiens GN=LTN1 PE=1 SV=6	200.4	5.9	17.5 (M:17.5)
116	C8AP2_HUMAN	CASP8-associated protein 2 OS=Homo sapiens GN=CASP8AP2 PE=1 SV=1	222.5	6.1	17.5 (M:17.5)
117	PAIRB_HUMAN	Plasminogen activator inhibitor 1 RNA-binding protein OS=Homo sapiens GN=SERBP1 PE=1 SV=2	44.9	9.3	17.4 (M:17.4)
118	OSBL6_HUMAN	Oxysterol-binding protein-related protein 6 OS=Homo sapiens GN=OSBPL6 PE=1 SV=1	106.2	6.5	17.4 (M:17.4)
119	RHG23_HUMAN	Rho GTPase-activating protein 23 OS=Homo sapiens GN=ARHGAP23 PE=1 SV=2	162.1	10.1	17.2 (M:17.2)
120	T151A_HUMAN	Transmembrane protein 151A OS=Homo sapiens GN=TMEM151A PE=2 SV=1	51.2	9.3	17.1 (M:17.1)
121	T10IP_HUMAN	Testis-specific protein 10-interacting protein OS=Homo sapiens GN=TSGA10IP PE=1 SV=2	62.3	10.1	17.1 (M:17.1)
122	CA112_HUMAN	Uncharacterized protein C1orf112 OS=Homo sapiens GN=C1orf112 PE=1 SV=1	96.5	5.6	17.1 (M:17.1)
123	RGF1A_HUMAN	Ras-GEF domain-containing family member 1A OS=Homo sapiens GN=RASGEF1A PE=2 SV=2	54.5	8.7	17.0 (M:17.0)
124	PCSK9_HUMAN	Proprotein convertase subtilisin/kexin type 9 OS=Homo sapiens GN=PCSK9 PE=1 SV=3	74.2	6.1	16.7 (M:16.7)
125	CC185_HUMAN	Coiled-coil domain-containing protein 185 OS=Homo sapiens GN=CCDC185 PE=1 SV=2	72.3	11.0	16.7 (M:16.7)
126	DYHC2_HUMAN	Cytoplasmic dynein 2 heavy chain 1 OS=Homo sapiens GN=DYNC2H1 PE=1 SV=4	492.3	6.1	16.4 (M:16.4)
127	CE152_HUMAN	Centrosomal protein of 152 kDa OS=Homo sapiens GN=CEP152 PE=1 SV=4	195.5	5.3	16.2 (M:16.2)
128	ZN800_HUMAN	Zinc finger protein 800 OS=Homo sapiens GN=ZNF800 PE=1 SV=1	75.2	10.3	16.1 (M:16.1)
129	MYO5A_HUMAN	Unconventional myosin-Va OS=Homo sapiens GN=MYO5A PE=1 SV=2	215.3	9.4	16.0 (M:16.0)
130	SEPT1_HUMAN	Septin-1 OS=Homo sapiens GN=SEPT1 PE=1 SV=2	41.9	5.5	16.0 (M:16.0)
131	VPS53_HUMAN	Vacuolar protein sorting-associated protein 53 homolog OS=Homo sapiens GN=VPS53 PE=1 SV=1	79.6	5.7	15.9 (M:15.9)
132	TBCD1_HUMAN	TBC1 domain family member 1 OS=Homo sapiens GN=TBC1D1 PE=1 SV=2	133.0	6.5	15.9 (M:15.9)
133	RHG29_HUMAN	Rho GTPase-activating protein 29 OS=Homo sapiens GN=ARHGAP29 PE=1 SV=2	142.0	6.3	15.9 (M:15.9)
134	BORG2_HUMAN	Cdc42 effector protein 3 OS=Homo sapiens GN=CDC42EP3 PE=1 SV=1	27.7	5.4	15.9 (M:15.9)
135	ITPR2_HUMAN	Inositol 1,4,5-trisphosphate receptor type 2 OS=Homo sapiens GN=ITPR2 PE=1 SV=2	307.9	6.0	15.8 (M:15.8)
136	VMAT2_HUMAN	Synaptic vesicular amine transporter OS=Homo sapiens GN=SLC18A2 PE=1 SV=2	55.7	5.6	15.8 (M:15.8)
137	OR2M4_HUMAN	Olfactory receptor 2M4 OS=Homo sapiens GN=OR2M4 PE=2 SV=2	35.0	9.7	15.8 (M:15.8)
138	CXXC1_HUMAN	CXXC-type zinc finger protein 1 OS=Homo sapiens GN=CXXC1 PE=1 SV=2	75.7	9.8	15.6 (M:15.6)
139	IPO7_HUMAN	Importin-7 OS=Homo sapiens GN=IPO7 PE=1 SV=1	119.4	4.6	15.6 (M:15.6)
140	MEI1_HUMAN	Meiosis inhibitor protein 1 OS=Homo sapiens GN=MEI1 PE=2 SV=2	141.1	6.2	15.6 (M:15.6)
141	CKP2L_HUMAN	Cytoskeleton-associated protein 2-like OS=Homo sapiens GN=CKAP2L PE=1 SV=4	83.5	10.4	15.4 (M:15.4)
142	TBCD5_HUMAN	TBC1 domain family member 5 OS=Homo sapiens GN=TBC1D5 PE=1 SV=1	88.9	6.1	15.4 (M:15.4)
143	TFR1_HUMAN	Transferrin receptor protein 1 OS=Homo sapiens GN=TFRC PE=1 SV=2	84.8	6.2	15.2 (M:15.2)
144	MOFA1_HUMAN	MORF4 family-associated protein 1 OS=Homo sapiens GN=MRFAP1 PE=1 SV=1	14.6	4.5	15.2 (M:15.2)
145	FGF3_HUMAN	Fibroblast growth factor 3 OS=Homo sapiens GN=FGF3 PE=1 SV=1	26.9	11.5	15.1 (M:15.1)
146	ZN788_HUMAN	Zinc finger protein 788 OS=Homo sapiens GN=ZNF788 PE=2 SV=2	71.9	10.6	15.1 (M:15.1)
147	PERL_HUMAN	Lactoperoxidase OS=Homo sapiens GN=LPO PE=1 SV=2	80.2	9.7	15.1 (M:15.1)
148	APC_HUMAN	Adenomatous polyposis coli protein OS=Homo sapiens GN=APC PE=1 SV=2	311.5	8.7	15.1 (M:15.1)
149	E41L2_HUMAN	Band 4.1-like protein 2 OS=Homo sapiens GN=EPB41L2 PE=1 SV=1	112.5	5.2	15.1 (M:15.1)
150	DYH1_HUMAN	Dynein heavy chain 1, axonemal OS=Homo sapiens GN=DNAH1 PE=2 SV=4	493.6	5.6	15.0 (M:15.0)

## Sheet: WaGa
Row	Accession	Protein	MW [kDa]	pI	Scores
1	H14_HUMAN	Histone H1.4 OS=Homo sapiens GN=HIST1H1E PE=1 SV=2	21.9	11.5	767.0 (M:767.0)
2	H2B1C_HUMAN	Histone H2B type 1-C/E/F/G/I OS=Homo sapiens GN=HIST1H2BC PE=1 SV=4	13.9	10.8	756.5 (M:756.5)
3	H12_HUMAN	Histone H1.2 OS=Homo sapiens GN=HIST1H1C PE=1 SV=2	21.4	11.4	719.9 (M:719.9)
4	H2B1K_HUMAN	Histone H2B type 1-K OS=Homo sapiens GN=HIST1H2BK PE=1 SV=3	13.9	10.8	717.2 (M:717.2)
5	H15_HUMAN	Histone H1.5 OS=Homo sapiens GN=HIST1H1B PE=1 SV=3	22.6	11.4	689.3 (M:689.3)
6	H2B2E_HUMAN	Histone H2B type 2-E OS=Homo sapiens GN=HIST2H2BE PE=1 SV=3	13.9	10.8	632.0 (M:632.0)
7	H4_HUMAN	Histone H4 OS=Homo sapiens GN=HIST1H4A PE=1 SV=2	11.4	11.8	438.5 (M:438.5)
8	H2A1H_HUMAN	Histone H2A type 1-H OS=Homo sapiens GN=HIST1H2AH PE=1 SV=3	13.9	11.3	354.0 (M:354.0)
9	H2A1B_HUMAN	Histone H2A type 1-B/E OS=Homo sapiens GN=HIST1H2AB PE=1 SV=2	14.1	11.5	292.4 (M:292.4)
10	LEG7_HUMAN	Galectin-7 OS=Homo sapiens GN=LGALS7 PE=1 SV=2	15.1	8.0	264.6 (M:264.6)
11	CH10_HUMAN	10 kDa heat shock protein, mitochondrial OS=Homo sapiens GN=HSPE1 PE=1 SV=2	10.9	9.4	244.0 (M:244.0)
12	ROA1_HUMAN	Heterogeneous nuclear ribonucleoprotein A1 OS=Homo sapiens GN=HNRNPA1 PE=1 SV=5	38.7	9.6	202.6 (M:202.6)
13	H3C_HUMAN	Histone H3.3C OS=Homo sapiens GN=H3F3C PE=1 SV=3	15.2	11.9	200.7 (M:200.7)
14	PPIA_HUMAN	Peptidyl-prolyl cis-trans isomerase A OS=Homo sapiens GN=PPIA PE=1 SV=2	18.0	9.0	189.6 (M:189.6)
15	ALBU_HUMAN	Serum albumin OS=Homo sapiens GN=ALB PE=1 SV=2	69.3	5.9	185.9 (M:185.9)
16	POTEE_HUMAN	POTE ankyrin domain family member E OS=Homo sapiens GN=POTEE PE=1 SV=3	121.3	5.8	175.6 (M:175.6)
17	HNRPK_HUMAN	Heterogeneous nuclear ribonucleoprotein K OS=Homo sapiens GN=HNRNPK PE=1 SV=1	50.9	5.3	170.3 (M:170.3)
18	H2AV_HUMAN	Histone H2A.V OS=Homo sapiens GN=H2AFV PE=1 SV=3	13.5	11.0	156.1 (M:156.1)
19	FUBP2_HUMAN	Far upstream element-binding protein 2 OS=Homo sapiens GN=KHSRP PE=1 SV=4	73.1	7.0	110.7 (M:110.7)
20	HNRPD_HUMAN	Heterogeneous nuclear ribonucleoprotein D0 OS=Homo sapiens GN=HNRNPD PE=1 SV=1	38.4	8.5	107.6 (M:107.6)
21	SRSF1_HUMAN	Serine/arginine-rich splicing factor 1 OS=Homo sapiens GN=SRSF1 PE=1 SV=2	27.7	10.8	101.2 (M:101.2)
22	APOC3_HUMAN	Apolipoprotein C-III OS=Homo sapiens GN=APOC3 PE=1 SV=1	10.8	5.1	91.0 (M:91.0)
23	CO4B_HUMAN	Complement C4-B OS=Homo sapiens GN=C4B PE=1 SV=2	192.6	7.0	90.3 (M:90.3)
24	SRSF7_HUMAN	Serine/arginine-rich splicing factor 7 OS=Homo sapiens GN=SRSF7 PE=1 SV=1	27.4	12.4	89.8 (M:89.8)
25	SRSF3_HUMAN	Serine/arginine-rich splicing factor 3 OS=Homo sapiens GN=SRSF3 PE=1 SV=1	19.3	12.3	86.4 (M:86.4)
26	TBA1C_HUMAN	Tubulin alpha-1C chain OS=Homo sapiens GN=TUBA1C PE=1 SV=1	49.9	4.8	82.7 (M:82.7)
27	STMN1_HUMAN	Stathmin OS=Homo sapiens GN=STMN1 PE=1 SV=3	17.3	5.7	81.3 (M:81.3)
28	HBB_HUMAN	Hemoglobin subunit beta OS=Homo sapiens GN=HBB PE=1 SV=2	16.0	6.9	80.9 (M:80.9)
29	PEDF_HUMAN	Pigment epithelium-derived factor OS=Homo sapiens GN=SERPINF1 PE=1 SV=4	46.3	6.0	79.0 (M:79.0)
30	COF1_HUMAN	Cofilin-1 OS=Homo sapiens GN=CFL1 PE=1 SV=3	18.5	9.1	77.6 (M:77.6)
31	HNRPU_HUMAN	Heterogeneous nuclear ribonucleoprotein U OS=Homo sapiens GN=HNRNPU PE=1 SV=6	90.5	5.7	74.3 (M:74.3)
32	HMGB1_HUMAN	High mobility group protein B1 OS=Homo sapiens GN=HMGB1 PE=1 SV=3	24.9	5.5	69.1 (M:69.1)
33	RBMX_HUMAN	RNA-binding motif protein, X chromosome OS=Homo sapiens GN=RBMX PE=1 SV=3	42.3	0.0	66.4 (M:66.4)
34	HBA_HUMAN	Hemoglobin subunit alpha OS=Homo sapiens GN=HBA1 PE=1 SV=2	15.2	9.4	62.8 (M:62.8)
35	HMGN2_HUMAN	Non-histone chromosomal protein HMG-17 OS=Homo sapiens GN=HMGN2 PE=1 SV=3	9.4	10.5	60.6 (M:60.6)
36	ROA2_HUMAN	Heterogeneous nuclear ribonucleoproteins A2/B1 OS=Homo sapiens GN=HNRNPA2B1 PE=1 SV=2	37.4	9.3	60.0 (M:60.0)
37	MIF_HUMAN	Macrophage migration inhibitory factor OS=Homo sapiens GN=MIF PE=1 SV=4	12.5	9.1	58.5 (M:58.5)
38	EF1A1_HUMAN	Elongation factor 1-alpha 1 OS=Homo sapiens GN=EEF1A1 PE=1 SV=1	50.1	9.7	57.1 (M:57.1)
39	ITIH2_HUMAN	Inter-alpha-trypsin inhibitor heavy chain H2 OS=Homo sapiens GN=ITIH2 PE=1 SV=2	106.4	6.4	57.0 (M:57.0)
40	SFPQ_HUMAN	Splicing factor, proline- and glutamine-rich OS=Homo sapiens GN=SFPQ PE=1 SV=2	76.1	9.9	55.8 (M:55.8)
41	UCHL1_HUMAN	Ubiquitin carboxyl-terminal hydrolase isozyme L1 OS=Homo sapiens GN=UCHL1 PE=1 SV=2	24.8	5.2	53.6 (M:53.6)
42	TRFL_HUMAN	Lactotransferrin OS=Homo sapiens GN=LTF PE=1 SV=6	78.1	9.6	50.7 (M:50.7)
43	DPOLQ_HUMAN	DNA polymerase theta OS=Homo sapiens GN=POLQ PE=1 SV=2	289.4	7.2	50.1 (M:50.1)
44	DPY30_HUMAN	Protein dpy-30 homolog OS=Homo sapiens GN=DPY30 PE=1 SV=1	11.2	4.7	48.9 (M:48.9)
45	DUT_HUMAN	Deoxyuridine 5'-triphosphate nucleotidohydrolase, mitochondrial OS=Homo sapiens GN=DUT PE=1 SV=4	26.5	10.2	48.4 (M:48.4)
46	CMGA_HUMAN	Chromogranin-A OS=Homo sapiens GN=CHGA PE=1 SV=7	50.7	4.4	47.7 (M:47.7)
47	HNRC3_HUMAN	Heterogeneous nuclear ribonucleoprotein C-like 3 OS=Homo sapiens GN=HNRNPCL3 PE=2 SV=1	32.0	5.4	47.4 (M:47.4)
48	SRSF2_HUMAN	Serine/arginine-rich splicing factor 2 OS=Homo sapiens GN=SRSF2 PE=1 SV=4	25.5	12.4	47.0 (M:47.0)
49	KCTD7_HUMAN	BTB/POZ domain-containing protein KCTD7 OS=Homo sapiens GN=KCTD7 PE=1 SV=1	33.1	5.5	43.6 (M:43.6)
50	THOC4_HUMAN	THO complex subunit 4 OS=Homo sapiens GN=ALYREF PE=1 SV=3	26.9	11.6	43.1 (M:43.1)
51	CCER2_HUMAN	Coiled-coil domain-containing glutamate-rich protein 2 OS=Homo sapiens GN=CCER2 PE=3 SV=1	30.3	5.2	42.8 (M:42.8)
52	CC146_HUMAN	Coiled-coil domain-containing protein 146 OS=Homo sapiens GN=CCDC146 PE=1 SV=2	112.7	9.2	42.3 (M:42.3)
53	ROAA_HUMAN	Heterogeneous nuclear ribonucleoprotein A/B OS=Homo sapiens GN=HNRNPAB PE=1 SV=2	36.2	8.8	42.2 (M:42.2)
54	THRB_HUMAN	Prothrombin OS=Homo sapiens GN=F2 PE=1 SV=2	70.0	5.6	42.1 (M:42.1)
55	SRS10_HUMAN	Serine/arginine-rich splicing factor 10 OS=Homo sapiens GN=SRSF10 PE=1 SV=1	31.3	11.8	41.9 (M:41.9)
56	CIRBP_HUMAN	Cold-inducible RNA-binding protein OS=Homo sapiens GN=CIRBP PE=1 SV=1	18.6	9.8	39.5 (M:39.5)
57	DYHC2_HUMAN	Cytoplasmic dynein 2 heavy chain 1 OS=Homo sapiens GN=DYNC2H1 PE=1 SV=4	492.3	6.1	38.1 (M:38.1)
58	MS3L1_HUMAN	Male-specific lethal 3 homolog OS=Homo sapiens GN=MSL3 PE=1 SV=1	59.8	9.2	37.1 (M:37.1)
59	NONO_HUMAN	Non-POU domain-containing octamer-binding protein OS=Homo sapiens GN=NONO PE=1 SV=4	54.2	9.6	37.0 (M:37.0)
60	DMD_HUMAN	Dystrophin OS=Homo sapiens GN=DMD PE=1 SV=3	426.5	5.6	36.3 (M:36.3)
61	1433Z_HUMAN	14-3-3 protein zeta/delta OS=Homo sapiens GN=YWHAZ PE=1 SV=1	27.7	4.6	35.0 (M:35.0)
62	LUZP1_HUMAN	Leucine zipper protein 1 OS=Homo sapiens GN=LUZP1 PE=1 SV=2	120.2	9.4	34.7 (M:34.7)
63	ODO2_HUMAN	Dihydrolipoyllysine-residue succinyltransferase component of 2-oxoglutarate dehydrogenase complex, mitochondrial OS=Homo sapiens GN=DLST PE=1 SV=4	48.7	9.9	33.4 (M:33.4)
64	REXON_HUMAN	Putative RNA exonuclease NEF-sp OS=Homo sapiens GN=44M2.3 PE=2 SV=1	86.8	9.6	33.1 (M:33.1)
65	GLPK3_HUMAN	Glycerol kinase 3 OS=Homo sapiens GN=GK3P PE=2 SV=2	60.6	6.0	32.6 (M:32.6)
66	OLIG1_HUMAN	Oligodendrocyte transcription factor 1 OS=Homo sapiens GN=OLIG1 PE=1 SV=2	27.9	10.5	32.4 (M:32.4)
67	RL29_HUMAN	60S ribosomal protein L29 OS=Homo sapiens GN=RPL29 PE=1 SV=2	17.7	12.3	32.1 (M:32.1)
68	CH60_HUMAN	60 kDa heat shock protein, mitochondrial OS=Homo sapiens GN=HSPD1 PE=1 SV=2	61.0	5.6	31.0 (M:31.0)
69	FUS_HUMAN	RNA-binding protein FUS OS=Homo sapiens GN=FUS PE=1 SV=1	53.4	9.7	29.5 (M:29.5)
70	HXA4_HUMAN	Homeobox protein Hox-A4 OS=Homo sapiens GN=HOXA4 PE=2 SV=3	34.5	10.4	29.5 (M:29.5)
71	UBE4B_HUMAN	Ubiquitin conjugation factor E4 B OS=Homo sapiens GN=UBE4B PE=1 SV=1	146.1	6.1	28.3 (M:28.3)
72	DOT1L_HUMAN	Histone-lysine N-methyltransferase, H3 lysine-79 specific OS=Homo sapiens GN=DOT1L PE=1 SV=2	184.7	10.0	27.9 (M:27.9)
73	YP023_HUMAN	Putative uncharacterized protein FLJ34945 OS=Homo sapiens PE=2 SV=1	14.2	12.6	27.4 (M:27.4)
74	SNX4_HUMAN	Sorting nexin-4 OS=Homo sapiens GN=SNX4 PE=1 SV=1	51.9	5.6	27.4 (M:27.4)
75	MTOR_HUMAN	Serine/threonine-protein kinase mTOR OS=Homo sapiens GN=MTOR PE=1 SV=1	288.7	6.8	27.2 (M:27.2)
76	FCERG_HUMAN	High affinity immunoglobulin epsilon receptor subunit gamma OS=Homo sapiens GN=FCER1G PE=1 SV=1	9.7	7.5	26.7 (M:26.7)
77	LSM8_HUMAN	U6 snRNA-associated Sm-like protein LSm8 OS=Homo sapiens GN=LSM8 PE=1 SV=3	10.4	4.2	26.6 (M:26.6)
78	K0907_HUMAN	UPF0469 protein KIAA0907 OS=Homo sapiens GN=KIAA0907 PE=1 SV=1	64.8	9.4	26.2 (M:26.2)
79	PSIP1_HUMAN	PC4 and SFRS1-interacting protein OS=Homo sapiens GN=PSIP1 PE=1 SV=1	60.1	9.7	25.4 (M:25.4)
80	GRP75_HUMAN	Stress-70 protein, mitochondrial OS=Homo sapiens GN=HSPA9 PE=1 SV=2	73.6	5.8	24.5 (M:24.5)
81	CLC11_HUMAN	C-type lectin domain family 11 member A OS=Homo sapiens GN=CLEC11A PE=1 SV=1	35.7	4.9	24.2 (M:24.2)
82	MYSM1_HUMAN	Histone H2A deubiquitinase MYSM1 OS=Homo sapiens GN=MYSM1 PE=1 SV=1	95.0	5.3	23.1 (M:23.1)
83	MYO1D_HUMAN	Unconventional myosin-Id OS=Homo sapiens GN=MYO1D PE=1 SV=2	116.1	10.0	22.7 (M:22.7)
84	KI67_HUMAN	Antigen KI-67 OS=Homo sapiens GN=MKI67 PE=1 SV=2	358.5	10.1	22.6 (M:22.6)
85	REPS2_HUMAN	RalBP1-associated Eps domain-containing protein 2 OS=Homo sapiens GN=REPS2 PE=1 SV=2	71.5	8.6	22.4 (M:22.4)
86	OFUT1_HUMAN	GDP-fucose protein O-fucosyltransferase 1 OS=Homo sapiens GN=POFUT1 PE=1 SV=1	43.9	9.5	22.1 (M:22.1)
87	TF3C2_HUMAN	General transcription factor 3C polypeptide 2 OS=Homo sapiens GN=GTF3C2 PE=1 SV=2	100.6	7.1	22.0 (M:22.0)
88	CE152_HUMAN	Centrosomal protein of 152 kDa OS=Homo sapiens GN=CEP152 PE=1 SV=4	195.5	5.3	21.9 (M:21.9)
89	SRRM2_HUMAN	Serine/arginine repetitive matrix protein 2 OS=Homo sapiens GN=SRRM2 PE=1 SV=2	299.4	12.6	21.6 (M:21.6)
90	CBL_HUMAN	E3 ubiquitin-protein ligase CBL OS=Homo sapiens GN=CBL PE=1 SV=2	99.6	6.1	21.5 (M:21.5)
91	KS6A3_HUMAN	Ribosomal protein S6 kinase alpha-3 OS=Homo sapiens GN=RPS6KA3 PE=1 SV=1	83.7	6.4	21.4 (M:21.4)
92	S3TC1_HUMAN	SH3 domain and tetratricopeptide repeat-containing protein 1 OS=Homo sapiens GN=SH3TC1 PE=1 SV=3	146.9	5.8	21.3 (M:21.3)
93	PAPD1_HUMAN	Poly(A) RNA polymerase, mitochondrial OS=Homo sapiens GN=MTPAP PE=1 SV=1	66.1	10.2	21.3 (M:21.3)
94	IF140_HUMAN	Intraflagellar transport protein 140 homolog OS=Homo sapiens GN=IFT140 PE=1 SV=1	165.1	5.6	21.3 (M:21.3)
95	TSH2_HUMAN	Teashirt homolog 2 OS=Homo sapiens GN=TSHZ2 PE=1 SV=3	114.9	8.9	21.1 (M:21.1)
96	HS12A_HUMAN	Heat shock 70 kDa protein 12A OS=Homo sapiens GN=HSPA12A PE=1 SV=2	74.9	6.3	21.1 (M:21.1)
97	RRAGA_HUMAN	Ras-related GTP-binding protein A OS=Homo sapiens GN=RRAGA PE=1 SV=1	36.5	8.8	21.0 (M:21.0)
98	SPAG5_HUMAN	Sperm-associated antigen 5 OS=Homo sapiens GN=SPAG5 PE=1 SV=2	134.3	4.8	21.0 (M:21.0)
99	TRIM4_HUMAN	E3 ubiquitin-protein ligase TRIM4 OS=Homo sapiens GN=TRIM4 PE=1 SV=2	57.4	9.4	20.6 (M:20.6)
100	VIR_HUMAN	Protein virilizer homolog OS=Homo sapiens GN=KIAA1429 PE=1 SV=2	201.9	4.8	20.5 (M:20.5)
101	PRDX2_HUMAN	Peroxiredoxin-2 OS=Homo sapiens GN=PRDX2 PE=1 SV=5	21.9	5.6	20.3 (M:20.3)
102	CI163_HUMAN	Uncharacterized protein C9orf163 OS=Homo sapiens GN=C9orf163 PE=2 SV=1	22.1	12.9	20.3 (M:20.3)
103	ABCAC_HUMAN	ATP-binding cassette sub-family A member 12 OS=Homo sapiens GN=ABCA12 PE=1 SV=3	293.0	8.6	20.1 (M:20.1)
104	Z280D_HUMAN	Zinc finger protein 280D OS=Homo sapiens GN=ZNF280D PE=1 SV=3	109.2	9.5	20.0 (M:20.0)
105	RL1D1_HUMAN	Ribosomal L1 domain-containing protein 1 OS=Homo sapiens GN=RSL1D1 PE=1 SV=3	54.9	10.7	19.7 (M:19.7)
106	CPSF1_HUMAN	Cleavage and polyadenylation specificity factor subunit 1 OS=Homo sapiens GN=CPSF1 PE=1 SV=2	160.8	6.0	19.6 (M:19.6)
107	NEP_HUMAN	Neprilysin OS=Homo sapiens GN=MME PE=1 SV=2	85.5	5.4	19.6 (M:19.6)
108	WNK4_HUMAN	Serine/threonine-protein kinase WNK4 OS=Homo sapiens GN=WNK4 PE=1 SV=1	134.7	5.2	19.4 (M:19.4)
109	PCD15_HUMAN	Protocadherin-15 OS=Homo sapiens GN=PCDH15 PE=1 SV=2	215.9	4.8	19.4 (M:19.4)
110	NALP4_HUMAN	NACHT, LRR and PYD domains-containing protein 4 OS=Homo sapiens GN=NLRP4 PE=1 SV=3	113.3	5.5	19.4 (M:19.4)
111	TESK1_HUMAN	Dual specificity testis-specific protein kinase 1 OS=Homo sapiens GN=TESK1 PE=1 SV=2	67.6	9.7	19.3 (M:19.3)
112	KPYM_HUMAN	Pyruvate kinase PKM OS=Homo sapiens GN=PKM PE=1 SV=4	57.9	9.0	19.3 (M:19.3)
113	AKD1A_HUMAN	Ankyrin repeat and death domain-containing protein 1A OS=Homo sapiens GN=ANKDD1A PE=2 SV=2	57.5	6.2	19.1 (M:19.1)
114	SCMH1_HUMAN	Polycomb protein SCMH1 OS=Homo sapiens GN=SCMH1 PE=1 SV=1	73.3	10.2	19.1 (M:19.1)
115	NRG2_HUMAN	Pro-neuregulin-2, membrane-bound isoform OS=Homo sapiens GN=NRG2 PE=1 SV=1	91.6	10.4	18.8 (M:18.8)
116	TERF1_HUMAN	Telomeric repeat-binding factor 1 OS=Homo sapiens GN=TERF1 PE=1 SV=3	50.2	6.0	18.8 (M:18.8)
117	GRIN3_HUMAN	G protein-regulated inducer of neurite outgrowth 3 OS=Homo sapiens GN=GPRIN3 PE=2 SV=2	82.4	8.7	18.8 (M:18.8)
118	PDE4A_HUMAN	cAMP-specific 3',5'-cyclic phosphodiesterase 4A OS=Homo sapiens GN=PDE4A PE=1 SV=3	98.1	5.0	18.7 (M:18.7)
119	MUC3B_HUMAN	Mucin-3B (Fragments) OS=Homo sapiens GN=MUC3B PE=2 SV=2	131.3	5.3	18.6 (M:18.6)
120	PI3R4_HUMAN	Phosphoinositide 3-kinase regulatory subunit 4 OS=Homo sapiens GN=PIK3R4 PE=1 SV=3	153.0	6.8	18.5 (M:18.5)
121	OCAD1_HUMAN	OCIA domain-containing protein 1 OS=Homo sapiens GN=OCIAD1 PE=1 SV=1	27.6	7.8	18.4 (M:18.4)
122	ZN788_HUMAN	Zinc finger protein 788 OS=Homo sapiens GN=ZNF788 PE=2 SV=2	71.9	10.6	18.3 (M:18.3)
123	IMUP_HUMAN	Immortalization up-regulated protein OS=Homo sapiens GN=IMUP PE=1 SV=1	10.9	10.2	18.1 (M:18.1)
124	FGFR4_HUMAN	Fibroblast growth factor receptor 4 OS=Homo sapiens GN=FGFR4 PE=1 SV=2	87.9	6.4	18.1 (M:18.1)
125	UBA7_HUMAN	Ubiquitin-like modifier-activating enzyme 7 OS=Homo sapiens GN=UBA7 PE=1 SV=2	111.6	5.6	18.0 (M:18.0)
126	SLK_HUMAN	STE20-like serine/threonine-protein kinase OS=Homo sapiens GN=SLK PE=1 SV=1	142.6	4.9	18.0 (M:18.0)
127	MED15_HUMAN	Mediator of RNA polymerase II transcription subunit 15 OS=Homo sapiens GN=MED15 PE=1 SV=2	86.7	10.2	17.9 (M:17.9)
128	K2C5_HUMAN	Keratin, type II cytoskeletal 5 OS=Homo sapiens GN=KRT5 PE=1 SV=3	62.3	8.6	17.8 (M:17.8)
129	LMNA_HUMAN	Prelamin-A/C OS=Homo sapiens GN=LMNA PE=1 SV=1	74.1	6.6	17.8 (M:17.8)
130	CMC2_HUMAN	Calcium-binding mitochondrial carrier protein Aralar2 OS=Homo sapiens GN=SLC25A13 PE=1 SV=2	74.1	9.4	17.8 (M:17.8)
131	ACOXL_HUMAN	Acyl-coenzyme A oxidase-like protein OS=Homo sapiens GN=ACOXL PE=2 SV=3	61.8	9.5	17.7 (M:17.7)
132	SF01_HUMAN	Splicing factor 1 OS=Homo sapiens GN=SF1 PE=1 SV=4	68.3	9.7	17.6 (M:17.6)
133	ADT2_HUMAN	ADP/ATP translocase 2 OS=Homo sapiens GN=SLC25A5 PE=1 SV=7	32.8	10.2	17.6 (M:17.6)
134	ACOX1_HUMAN	Peroxisomal acyl-coenzyme A oxidase 1 OS=Homo sapiens GN=ACOX1 PE=1 SV=3	74.4	9.1	17.6 (M:17.6)
135	MYO10_HUMAN	Unconventional myosin-X OS=Homo sapiens GN=MYO10 PE=1 SV=3	237.2	5.8	17.6 (M:17.6)
136	PI4KB_HUMAN	Phosphatidylinositol 4-kinase beta OS=Homo sapiens GN=PI4KB PE=1 SV=1	91.3	5.8	17.5 (M:17.5)
137	MKS1_HUMAN	Meckel syndrome type 1 protein OS=Homo sapiens GN=MKS1 PE=1 SV=2	64.5	6.0	17.5 (M:17.5)
138	CYHR1_HUMAN	Cysteine and histidine-rich protein 1 OS=Homo sapiens GN=CYHR1 PE=1 SV=2	40.7	7.1	17.4 (M:17.4)
139	PLXA2_HUMAN	Plexin-A2 OS=Homo sapiens GN=PLXNA2 PE=1 SV=4	211.0	6.0	17.4 (M:17.4)
140	PTRF_HUMAN	Polymerase I and transcript release factor OS=Homo sapiens GN=PTRF PE=1 SV=1	43.4	5.4	17.4 (M:17.4)
141	FNBP1_HUMAN	Formin-binding protein 1 OS=Homo sapiens GN=FNBP1 PE=1 SV=2	71.3	5.4	17.3 (M:17.3)
142	T151A_HUMAN	Transmembrane protein 151A OS=Homo sapiens GN=TMEM151A PE=2 SV=1	51.2	9.3	17.2 (M:17.2)
143	RL26L_HUMAN	60S ribosomal protein L26-like 1 OS=Homo sapiens GN=RPL26L1 PE=1 SV=1	17.2	11.0	17.1 (M:17.1)
144	GAS8_HUMAN	Growth arrest-specific protein 8 OS=Homo sapiens GN=GAS8 PE=1 SV=1	56.3	8.6	17.1 (M:17.1)
145	COBA2_HUMAN	Collagen alpha-2(XI) chain OS=Homo sapiens GN=COL11A2 PE=1 SV=5	171.7	5.8	17.0 (M:17.0)
146	TNR6B_HUMAN	Trinucleotide repeat-containing gene 6B protein OS=Homo sapiens GN=TNRC6B PE=1 SV=4	193.9	6.3	17.0 (M:17.0)
147	SC11A_HUMAN	Signal peptidase complex catalytic subunit SEC11A OS=Homo sapiens GN=SEC11A PE=1 SV=1	20.6	9.9	16.9 (M:16.9)
148	FLNB_HUMAN	Filamin-B OS=Homo sapiens GN=FLNB PE=1 SV=2	278.0	5.4	16.9 (M:16.9)
149	CQ047_HUMAN	Uncharacterized protein C17orf47 OS=Homo sapiens GN=C17orf47 PE=2 SV=3	63.1	9.9	16.9 (M:16.9)
150	CA112_HUMAN	Uncharacterized protein C1orf112 OS=Homo sapiens GN=C1orf112 PE=1 SV=1	96.5	5.6	16.9 (M:16.9)
151	NALCN_HUMAN	Sodium leak channel non-selective protein OS=Homo sapiens GN=NALCN PE=1 SV=1	200.2	9.7	16.9 (M:16.9)
152	TRI34_HUMAN	Tripartite motif-containing protein 34 OS=Homo sapiens GN=TRIM34 PE=1 SV=2	56.8	8.5	16.8 (M:16.8)
153	SI1L2_HUMAN	Signal-induced proliferation-associated 1-like protein 2 OS=Homo sapiens GN=SIPA1L2 PE=1 SV=2	190.3	6.3	16.8 (M:16.8)
154	NCAN_HUMAN	Neurocan core protein OS=Homo sapiens GN=NCAN PE=1 SV=3	143.0	5.1	16.7 (M:16.7)
155	IGS21_HUMAN	Immunoglobulin superfamily member 21 OS=Homo sapiens GN=IGSF21 PE=2 SV=1	51.8	6.5	16.7 (M:16.7)
156	CO6A3_HUMAN	Collagen alpha-3(VI) chain OS=Homo sapiens GN=COL6A3 PE=1 SV=5	343.5	6.3	16.6 (M:16.6)
157	TUT4_HUMAN	Terminal uridylyltransferase 4 OS=Homo sapiens GN=ZCCHC11 PE=1 SV=3	185.0	9.3	16.5 (M:16.5)
158	DNLI3_HUMAN	DNA ligase 3 OS=Homo sapiens GN=LIG3 PE=1 SV=2	112.8	10.0	16.4 (M:16.4)
159	ORC5_HUMAN	Origin recognition complex subunit 5 OS=Homo sapiens GN=ORC5 PE=1 SV=1	50.3	8.6	16.4 (M:16.4)
160	LRC8E_HUMAN	Volume-regulated anion channel subunit LRRC8E OS=Homo sapiens GN=LRRC8E PE=1 SV=2	90.2	6.5	16.3 (M:16.3)
161	SPTCS_HUMAN	Spatacsin OS=Homo sapiens GN=SPG11 PE=1 SV=3	278.7	5.6	16.2 (M:16.2)
162	SAC2_HUMAN	Phosphatidylinositide phosphatase SAC2 OS=Homo sapiens GN=INPP5F PE=1 SV=3	128.3	6.6	16.2 (M:16.2)
163	VASN_HUMAN	Vasorin OS=Homo sapiens GN=VASN PE=1 SV=1	71.7	8.0	16.1 (M:16.1)
164	VPS18_HUMAN	Vacuolar protein sorting-associated protein 18 homolog OS=Homo sapiens GN=VPS18 PE=1 SV=2	110.1	5.7	16.1 (M:16.1)
165	GIPC3_HUMAN	PDZ domain-containing protein GIPC3 OS=Homo sapiens GN=GIPC3 PE=1 SV=1	34.0	5.4	16.1 (M:16.1)
166	FXR2_HUMAN	Fragile X mental retardation syndrome-related protein 2 OS=Homo sapiens GN=FXR2 PE=1 SV=2	74.2	5.9	16.1 (M:16.1)
167	PRI2_HUMAN	DNA primase large subunit OS=Homo sapiens GN=PRIM2 PE=1 SV=2	58.8	8.8	16.1 (M:16.1)
168	SHOC2_HUMAN	Leucine-rich repeat protein SHOC-2 OS=Homo sapiens GN=SHOC2 PE=1 SV=2	64.8	9.4	16.0 (M:16.0)
169	NEK1_HUMAN	Serine/threonine-protein kinase Nek1 OS=Homo sapiens GN=NEK1 PE=1 SV=2	142.7	5.6	16.0 (M:16.0)
170	TELO2_HUMAN	Telomere length regulation protein TEL2 homolog OS=Homo sapiens GN=TELO2 PE=1 SV=2	91.7	5.5	15.9 (M:15.9)
171	FGF3_HUMAN	Fibroblast growth factor 3 OS=Homo sapiens GN=FGF3 PE=1 SV=1	26.9	11.5	15.8 (M:15.8)
172	CC154_HUMAN	Coiled-coil domain-containing protein 154 OS=Homo sapiens GN=CCDC154 PE=2 SV=4	76.0	9.5	15.8 (M:15.8)
173	ITPR2_HUMAN	Inositol 1,4,5-trisphosphate receptor type 2 OS=Homo sapiens GN=ITPR2 PE=1 SV=2	307.9	6.0	15.8 (M:15.8)
174	TCPH_HUMAN	T-complex protein 1 subunit eta OS=Homo sapiens GN=CCT7 PE=1 SV=2	59.3	8.6	15.8 (M:15.8)
175	MESD1_HUMAN	Mesoderm development candidate 1 OS=Homo sapiens GN=MESDC1 PE=1 SV=1	37.7	10.0	15.7 (M:15.7)
176	TBCD1_HUMAN	TBC1 domain family member 1 OS=Homo sapiens GN=TBC1D1 PE=1 SV=2	133.0	6.5	15.7 (M:15.7)
177	TAB3_HUMAN	TGF-beta-activated kinase 1 and MAP3K7-binding protein 3 OS=Homo sapiens GN=TAB3 PE=1 SV=2	78.6	9.5	15.7 (M:15.7)
178	CC88B_HUMAN	Coiled-coil domain-containing protein 88B OS=Homo sapiens GN=CCDC88B PE=1 SV=1	164.7	4.9	15.7 (M:15.7)
179	H1FNT_HUMAN	Testis-specific H1 histone OS=Homo sapiens GN=H1FNT PE=2 SV=3	28.1	12.4	15.7 (M:15.7)
180	NBAS_HUMAN	Neuroblastoma-amplified sequence OS=Homo sapiens GN=NBAS PE=1 SV=2	268.4	5.6	15.6 (M:15.6)
181	STAR4_HUMAN	StAR-related lipid transfer protein 4 OS=Homo sapiens GN=STARD4 PE=2 SV=1	23.5	5.0	15.6 (M:15.6)
182	MA7D2_HUMAN	MAP7 domain-containing protein 2 OS=Homo sapiens GN=MAP7D2 PE=1 SV=2	81.9	9.6	15.6 (M:15.6)
183	PRKDC_HUMAN	DNA-dependent protein kinase catalytic subunit OS=Homo sapiens GN=PRKDC PE=1 SV=3	468.8	6.8	15.6 (M:15.6)
184	CJ035_HUMAN	Uncharacterized protein C10orf35 OS=Homo sapiens GN=C10orf35 PE=1 SV=1	13.2	12.1	15.5 (M:15.5)
185	CS044_HUMAN	Uncharacterized protein C19orf44 OS=Homo sapiens GN=C19orf44 PE=1 SV=1	71.3	5.4	15.5 (M:15.5)
186	TF3C1_HUMAN	General transcription factor 3C polypeptide 1 OS=Homo sapiens GN=GTF3C1 PE=1 SV=4	238.7	7.1	15.5 (M:15.5)
187	ACBD5_HUMAN	Acyl-CoA-binding domain-containing protein 5 OS=Homo sapiens GN=ACBD5 PE=1 SV=1	60.1	5.1	15.5 (M:15.5)
188	VW5B1_HUMAN	von Willebrand factor A domain-containing protein 5B1 OS=Homo sapiens GN=VWA5B1 PE=1 SV=2	133.7	9.4	15.5 (M:15.5)
189	PAXB1_HUMAN	PAX3- and PAX7-binding protein 1 OS=Homo sapiens GN=PAXBP1 PE=1 SV=2	104.7	5.4	15.4 (M:15.4)
190	TIAM2_HUMAN	T-lymphoma invasion and metastasis-inducing protein 2 OS=Homo sapiens GN=TIAM2 PE=2 SV=4	190.0	6.8	15.4 (M:15.4)
191	NSGX_HUMAN	Susceptibility protein NSG-x OS=Homo sapiens GN=CDKN2A-AS1 PE=4 SV=1	8.8	12.3	15.4 (M:15.4)
192	TMM56_HUMAN	Transmembrane protein 56 OS=Homo sapiens GN=TMEM56 PE=1 SV=1	30.0	10.0	15.4 (M:15.4)
193	TBCD5_HUMAN	TBC1 domain family member 5 OS=Homo sapiens GN=TBC1D5 PE=1 SV=1	88.9	6.1	15.4 (M:15.4)
194	IGBP1_HUMAN	Immunoglobulin-binding protein 1 OS=Homo sapiens GN=IGBP1 PE=1 SV=1	39.2	5.1	15.3 (M:15.3)
195	FAKD2_HUMAN	FAST kinase domain-containing protein 2, mitochondrial OS=Homo sapiens GN=FASTKD2 PE=1 SV=1	81.4	9.2	15.3 (M:15.3)
196	PERM_HUMAN	Myeloperoxidase OS=Homo sapiens GN=MPO PE=1 SV=1	83.8	10.1	15.3 (M:15.3)
197	ZP4_HUMAN	Zona pellucida sperm-binding protein 4 OS=Homo sapiens GN=ZP4 PE=2 SV=1	59.4	6.3	15.3 (M:15.3)
198	FRG1_HUMAN	Protein FRG1 OS=Homo sapiens GN=FRG1 PE=1 SV=1	29.2	9.8	15.3 (M:15.3)
199	NQO1_HUMAN	NAD(P)H dehydrogenase [quinone] 1 OS=Homo sapiens GN=NQO1 PE=1 SV=1	30.8	9.4	15.3 (M:15.3)
200	ADPRM_HUMAN	Manganese-dependent ADP-ribose/CDP-alcohol diphosphatase OS=Homo sapiens GN=ADPRM PE=1 SV=1	39.5	5.2	15.3 (M:15.3)
201	HTRA4_HUMAN	Serine protease HTRA4 OS=Homo sapiens GN=HTRA4 PE=2 SV=1	50.9	9.6	15.3 (M:15.3)
202	VMAT2_HUMAN	Synaptic vesicular amine transporter OS=Homo sapiens GN=SLC18A2 PE=1 SV=2	55.7	5.6	15.3 (M:15.3)
203	CHIN_HUMAN	N-chimaerin OS=Homo sapiens GN=CHN1 PE=1 SV=3	53.1	6.5	15.3 (M:15.3)
204	MICA1_HUMAN	Protein-methionine sulfoxide oxidase MICAL1 OS=Homo sapiens GN=MICAL1 PE=1 SV=2	117.8	6.0	15.3 (M:15.3)
205	TOR2X_HUMAN	Prosalusin OS=Homo sapiens GN=TOR2A PE=1 SV=1	26.2	11.3	15.2 (M:15.2)
206	LAMC2_HUMAN	Laminin subunit gamma-2 OS=Homo sapiens GN=LAMC2 PE=1 SV=2	130.9	5.8	15.2 (M:15.2)
207	ASXL2_HUMAN	Putative Polycomb group protein ASXL2 OS=Homo sapiens GN=ASXL2 PE=1 SV=1	153.7	9.8	15.2 (M:15.2)
208	BCL7C_HUMAN	B-cell CLL/lymphoma 7 protein family member C OS=Homo sapiens GN=BCL7C PE=1 SV=3	23.5	5.0	15.2 (M:15.2)
209	TSN11_HUMAN	Tetraspanin-11 OS=Homo sapiens GN=TSPAN11 PE=2 SV=2	28.2	8.8	15.1 (M:15.1)
210	PCX1_HUMAN	Pecanex-like protein 1 OS=Homo sapiens GN=PCNX1 PE=1 SV=2	258.5	6.8	15.1 (M:15.1)
211	TAAR1_HUMAN	Trace amine-associated receptor 1 OS=Homo sapiens GN=TAAR1 PE=2 SV=1	39.1	9.9	15.1 (M:15.1)
212	AK1C2_HUMAN	Aldo-keto reductase family 1 member C2 OS=Homo sapiens GN=AKR1C2 PE=1 SV=3	36.7	7.8	15.0 (M:15.0)
213	TCF19_HUMAN	Transcription factor 19 OS=Homo sapiens GN=TCF19 PE=1 SV=2	37.2	8.7	15.0 (M:15.0)
214	GALT9_HUMAN	Polypeptide N-acetylgalactosaminyltransferase 9 OS=Homo sapiens GN=GALNT9 PE=2 SV=3	68.3	9.5	15.0 (M:15.0)

## Sheet: MCC13
Row	Accession	Protein	MW [kDa]	pI	Scores
1	H2B1C_HUMAN	Histone H2B type 1-C/E/F/G/I OS=Homo sapiens GN=HIST1H2BC PE=1 SV=4	13.9	10.8	946.1 (M:946.1)
2	H2B1H_HUMAN	Histone H2B type 1-H OS=Homo sapiens GN=HIST1H2BH PE=1 SV=3	13.9	10.8	925.3 (M:925.3)
3	H2B1K_HUMAN	Histone H2B type 1-K OS=Homo sapiens GN=HIST1H2BK PE=1 SV=3	13.9	10.8	890.9 (M:890.9)
4	LMNA_HUMAN	Prelamin-A/C OS=Homo sapiens GN=LMNA PE=1 SV=1	74.1	6.6	694.6 (M:694.6)
5	H14_HUMAN	Histone H1.4 OS=Homo sapiens GN=HIST1H1E PE=1 SV=2	21.9	11.5	685.5 (M:685.5)
6	ROA2_HUMAN	Heterogeneous nuclear ribonucleoproteins A2/B1 OS=Homo sapiens GN=HNRNPA2B1 PE=1 SV=2	37.4	9.3	622.1 (M:622.1)
7	ACTB_HUMAN	Actin, cytoplasmic 1 OS=Homo sapiens GN=ACTB PE=1 SV=1	41.7	5.2	589.7 (M:589.7)
8	PPIA_HUMAN	Peptidyl-prolyl cis-trans isomerase A OS=Homo sapiens GN=PPIA PE=1 SV=2	18.0	9.0	542.0 (M:542.0)
9	ROA1_HUMAN	Heterogeneous nuclear ribonucleoprotein A1 OS=Homo sapiens GN=HNRNPA1 PE=1 SV=5	38.7	9.6	508.6 (M:508.6)
10	NPM_HUMAN	Nucleophosmin OS=Homo sapiens GN=NPM1 PE=1 SV=2	32.6	4.5	505.3 (M:505.3)
11	K2C5_HUMAN	Keratin, type II cytoskeletal 5 OS=Homo sapiens GN=KRT5 PE=1 SV=3	62.3	8.6	466.0 (M:466.0)
12	STIP1_HUMAN	Stress-induced-phosphoprotein 1 OS=Homo sapiens GN=STIP1 PE=1 SV=1	62.6	6.4	459.5 (M:459.5)
13	H2A1_HUMAN	Histone H2A type 1 OS=Homo sapiens GN=HIST1H2AG PE=1 SV=2	14.1	11.4	448.8 (M:448.8)
14	H2A1C_HUMAN	Histone H2A type 1-C OS=Homo sapiens GN=HIST1H2AC PE=1 SV=3	14.1	11.5	448.5 (M:448.5)
15	H4_HUMAN	Histone H4 OS=Homo sapiens GN=HIST1H4A PE=1 SV=2	11.4	11.8	435.7 (M:435.7)
16	G3P_HUMAN	Glyceraldehyde-3-phosphate dehydrogenase OS=Homo sapiens GN=GAPDH PE=1 SV=3	36.0	9.3	425.7 (M:425.7)
17	POTEE_HUMAN	POTE ankyrin domain family member E OS=Homo sapiens GN=POTEE PE=1 SV=3	121.3	5.8	407.4 (M:407.4)
18	CH10_HUMAN	10 kDa heat shock protein, mitochondrial OS=Homo sapiens GN=HSPE1 PE=1 SV=2	10.9	9.4	395.9 (M:395.9)
19	H11_HUMAN	Histone H1.1 OS=Homo sapiens GN=HIST1H1A PE=1 SV=3	21.8	11.5	393.6 (M:393.6)
20	ENOA_HUMAN	Alpha-enolase OS=Homo sapiens GN=ENO1 PE=1 SV=2	47.1	7.7	378.6 (M:378.6)
21	HSPB1_HUMAN	Heat shock protein beta-1 OS=Homo sapiens GN=HSPB1 PE=1 SV=2	22.8	6.0	369.8 (M:369.8)
22	H33_HUMAN	Histone H3.3 OS=Homo sapiens GN=H3F3A PE=1 SV=2	15.3	11.9	357.9 (M:357.9)
23	CH60_HUMAN	60 kDa heat shock protein, mitochondrial OS=Homo sapiens GN=HSPD1 PE=1 SV=2	61.0	5.6	341.2 (M:341.2)
24	K2C8_HUMAN	Keratin, type II cytoskeletal 8 OS=Homo sapiens GN=KRT8 PE=1 SV=7	53.7	5.4	340.7 (M:340.7)
25	H15_HUMAN	Histone H1.5 OS=Homo sapiens GN=HIST1H1B PE=1 SV=3	22.6	11.4	337.1 (M:337.1)
26	HNRPD_HUMAN	Heterogeneous nuclear ribonucleoprotein D0 OS=Homo sapiens GN=HNRNPD PE=1 SV=1	38.4	8.5	321.0 (M:321.0)
27	FLNA_HUMAN	Filamin-A OS=Homo sapiens GN=FLNA PE=1 SV=4	280.6	5.7	319.3 (M:319.3)
28	PLIN3_HUMAN	Perilipin-3 OS=Homo sapiens GN=PLIN3 PE=1 SV=3	47.0	5.2	280.5 (M:280.5)
29	TPIS_HUMAN	Triosephosphate isomerase OS=Homo sapiens GN=TPI1 PE=1 SV=3	30.8	5.6	266.7 (M:266.7)
30	HNRPK_HUMAN	Heterogeneous nuclear ribonucleoprotein K OS=Homo sapiens GN=HNRNPK PE=1 SV=1	50.9	5.3	257.8 (M:257.8)
31	GRP78_HUMAN	78 kDa glucose-regulated protein OS=Homo sapiens GN=HSPA5 PE=1 SV=2	72.3	4.9	254.5 (M:254.5)
32	FUBP2_HUMAN	Far upstream element-binding protein 2 OS=Homo sapiens GN=KHSRP PE=1 SV=4	73.1	7.0	253.0 (M:253.0)
33	RS19_HUMAN	40S ribosomal protein S19 OS=Homo sapiens GN=RPS19 PE=1 SV=2	16.1	10.7	247.1 (M:247.1)
34	RL8_HUMAN	60S ribosomal protein L8 OS=Homo sapiens GN=RPL8 PE=1 SV=2	28.0	11.9	232.8 (M:232.8)
35	PABP1_HUMAN	Polyadenylate-binding protein 1 OS=Homo sapiens GN=PABPC1 PE=1 SV=2	70.6	10.0	225.8 (M:225.8)
36	EZRI_HUMAN	Ezrin OS=Homo sapiens GN=EZR PE=1 SV=4	69.4	5.9	211.5 (M:211.5)
37	ALDOA_HUMAN	Fructose-bisphosphate aldolase A OS=Homo sapiens GN=ALDOA PE=1 SV=2	39.4	9.2	207.2 (M:207.2)
38	GRP75_HUMAN	Stress-70 protein, mitochondrial OS=Homo sapiens GN=HSPA9 PE=1 SV=2	73.6	5.8	205.9 (M:205.9)
39	COF1_HUMAN	Cofilin-1 OS=Homo sapiens GN=CFL1 PE=1 SV=3	18.5	9.1	203.8 (M:203.8)
40	YBOX1_HUMAN	Nuclease-sensitive element-binding protein 1 OS=Homo sapiens GN=YBX1 PE=1 SV=3	35.9	0.0	203.1 (M:203.1)
41	PAIRB_HUMAN	Plasminogen activator inhibitor 1 RNA-binding protein OS=Homo sapiens GN=SERBP1 PE=1 SV=2	44.9	9.3	199.9 (M:199.9)
42	KPYM_HUMAN	Pyruvate kinase PKM OS=Homo sapiens GN=PKM PE=1 SV=4	57.9	9.0	198.8 (M:198.8)
43	K1C18_HUMAN	Keratin, type I cytoskeletal 18 OS=Homo sapiens GN=KRT18 PE=1 SV=2	48.0	5.2	192.5 (M:192.5)
44	YBOX3_HUMAN	Y-box-binding protein 3 OS=Homo sapiens GN=YBX3 PE=1 SV=4	40.1	10.1	177.3 (M:177.3)
45	EF1A1_HUMAN	Elongation factor 1-alpha 1 OS=Homo sapiens GN=EEF1A1 PE=1 SV=1	50.1	9.7	175.8 (M:175.8)
46	ALBU_HUMAN	Serum albumin OS=Homo sapiens GN=ALB PE=1 SV=2	69.3	5.9	174.4 (M:174.4)
47	MYH9_HUMAN	Myosin-9 OS=Homo sapiens GN=MYH9 PE=1 SV=4	226.4	5.4	170.1 (M:170.1)
48	BAF_HUMAN	Barrier-to-autointegration factor OS=Homo sapiens GN=BANF1 PE=1 SV=1	10.1	5.8	169.4 (M:169.4)
49	PDIA3_HUMAN	Protein disulfide-isomerase A3 OS=Homo sapiens GN=PDIA3 PE=1 SV=4	56.7	5.9	165.2 (M:165.2)
50	ROAA_HUMAN	Heterogeneous nuclear ribonucleoprotein A/B OS=Homo sapiens GN=HNRNPAB PE=1 SV=2	36.2	8.8	162.8 (M:162.8)
51	MIF_HUMAN	Macrophage migration inhibitory factor OS=Homo sapiens GN=MIF PE=1 SV=4	12.5	9.1	161.5 (M:161.5)
52	RL3_HUMAN	60S ribosomal protein L3 OS=Homo sapiens GN=RPL3 PE=1 SV=2	46.1	10.8	159.0 (M:159.0)
53	RS12_HUMAN	40S ribosomal protein S12 OS=Homo sapiens GN=RPS12 PE=1 SV=3	14.5	7.7	158.5 (M:158.5)
54	HSP7C_HUMAN	Heat shock cognate 71 kDa protein OS=Homo sapiens GN=HSPA8 PE=1 SV=1	70.9	5.2	156.6 (M:156.6)
55	RL29_HUMAN	60S ribosomal protein L29 OS=Homo sapiens GN=RPL29 PE=1 SV=2	17.7	12.3	153.1 (M:153.1)
56	K1C17_HUMAN	Keratin, type I cytoskeletal 17 OS=Homo sapiens GN=KRT17 PE=1 SV=2	48.1	4.8	150.0 (M:150.0)
57	NUCL_HUMAN	Nucleolin OS=Homo sapiens GN=NCL PE=1 SV=3	76.6	4.4	145.7 (M:145.7)
58	RL19_HUMAN	60S ribosomal protein L19 OS=Homo sapiens GN=RPL19 PE=1 SV=1	23.5	12.1	142.3 (M:142.3)
59	1433Z_HUMAN	14-3-3 protein zeta/delta OS=Homo sapiens GN=YWHAZ PE=1 SV=1	27.7	4.6	141.9 (M:141.9)
60	RL30_HUMAN	60S ribosomal protein L30 OS=Homo sapiens GN=RPL30 PE=1 SV=2	12.8	10.2	141.6 (M:141.6)
61	ROA3_HUMAN	Heterogeneous nuclear ribonucleoprotein A3 OS=Homo sapiens GN=HNRNPA3 PE=1 SV=2	39.6	9.6	140.8 (M:140.8)
62	HNRDL_HUMAN	Heterogeneous nuclear ribonucleoprotein D-like OS=Homo sapiens GN=HNRNPDL PE=1 SV=3	46.4	10.0	140.2 (M:140.2)
63	EGFR_HUMAN	Epidermal growth factor receptor OS=Homo sapiens GN=EGFR PE=1 SV=2	134.2	6.3	139.3 (M:139.3)
64	RL7A_HUMAN	60S ribosomal protein L7a OS=Homo sapiens GN=RPL7A PE=1 SV=2	30.0	11.3	138.6 (M:138.6)
65	SF01_HUMAN	Splicing factor 1 OS=Homo sapiens GN=SF1 PE=1 SV=4	68.3	9.7	137.4 (M:137.4)
66	PRDX6_HUMAN	Peroxiredoxin-6 OS=Homo sapiens GN=PRDX6 PE=1 SV=3	25.0	6.0	132.5 (M:132.5)
67	HNRPU_HUMAN	Heterogeneous nuclear ribonucleoprotein U OS=Homo sapiens GN=HNRNPU PE=1 SV=6	90.5	5.7	128.6 (M:128.6)
68	ACTN1_HUMAN	Alpha-actinin-1 OS=Homo sapiens GN=ACTN1 PE=1 SV=2	103.0	5.1	128.3 (M:128.3)
69	ATPA_HUMAN	ATP synthase subunit alpha, mitochondrial OS=Homo sapiens GN=ATP5A1 PE=1 SV=1	59.7	9.6	127.6 (M:127.6)
70	HNRPM_HUMAN	Heterogeneous nuclear ribonucleoprotein M OS=Homo sapiens GN=HNRNPM PE=1 SV=3	77.5	9.6	126.7 (M:126.7)
71	IF4H_HUMAN	Eukaryotic translation initiation factor 4H OS=Homo sapiens GN=EIF4H PE=1 SV=5	27.4	7.5	125.4 (M:125.4)
72	SFPQ_HUMAN	Splicing factor, proline- and glutamine-rich OS=Homo sapiens GN=SFPQ PE=1 SV=2	76.1	9.9	125.0 (M:125.0)
73	S10AB_HUMAN	Protein S100-A11 OS=Homo sapiens GN=S100A11 PE=1 SV=2	11.7	7.5	124.7 (M:124.7)
74	FUBP1_HUMAN	Far upstream element-binding protein 1 OS=Homo sapiens GN=FUBP1 PE=1 SV=3	67.5	7.8	123.2 (M:123.2)
75	RS25_HUMAN	40S ribosomal protein S25 OS=Homo sapiens GN=RPS25 PE=1 SV=1	13.7	10.6	122.5 (M:122.5)
76	HGB1A_HUMAN	Putative high mobility group protein B1-like 1 OS=Homo sapiens GN=HMGB1P1 PE=5 SV=1	24.2	5.9	121.5 (M:121.5)
77	RS28_HUMAN	40S ribosomal protein S28 OS=Homo sapiens GN=RPS28 PE=1 SV=1	7.8	11.6	118.7 (M:118.7)
78	RL23A_HUMAN	60S ribosomal protein L23a OS=Homo sapiens GN=RPL23A PE=1 SV=1	17.7	10.9	117.8 (M:117.8)
79	1433S_HUMAN	14-3-3 protein sigma OS=Homo sapiens GN=SFN PE=1 SV=1	27.8	4.5	114.7 (M:114.7)
80	4F2_HUMAN	4F2 cell-surface antigen heavy chain OS=Homo sapiens GN=SLC3A2 PE=1 SV=3	68.0	4.7	112.3 (M:112.3)
81	RBMX_HUMAN	RNA-binding motif protein, X chromosome OS=Homo sapiens GN=RBMX PE=1 SV=3	42.3	0.0	111.5 (M:111.5)
82	RL31_HUMAN	60S ribosomal protein L31 OS=Homo sapiens GN=RPL31 PE=1 SV=1	14.5	11.0	109.8 (M:109.8)
83	RLA2_HUMAN	60S acidic ribosomal protein P2 OS=Homo sapiens GN=RPLP2 PE=1 SV=1	11.7	4.2	108.0 (M:108.0)
84	SRSF3_HUMAN	Serine/arginine-rich splicing factor 3 OS=Homo sapiens GN=SRSF3 PE=1 SV=1	19.3	12.3	107.3 (M:107.3)
85	RL18_HUMAN	60S ribosomal protein L18 OS=Homo sapiens GN=RPL18 PE=1 SV=2	21.6	12.3	107.0 (M:107.0)
86	HNRPQ_HUMAN	Heterogeneous nuclear ribonucleoprotein Q OS=Homo sapiens GN=SYNCRIP PE=1 SV=2	69.6	9.1	106.4 (M:106.4)
87	ANXA2_HUMAN	Annexin A2 OS=Homo sapiens GN=ANXA2 PE=1 SV=2	38.6	8.5	106.1 (M:106.1)
88	RL13_HUMAN	60S ribosomal protein L13 OS=Homo sapiens GN=RPL13 PE=1 SV=4	24.2	12.2	103.4 (M:103.4)
89	PDLI1_HUMAN	PDZ and LIM domain protein 1 OS=Homo sapiens GN=PDLIM1 PE=1 SV=4	36.0	6.6	103.1 (M:103.1)
90	EF2_HUMAN	Elongation factor 2 OS=Homo sapiens GN=EEF2 PE=1 SV=4	95.3	6.4	100.9 (M:100.9)
91	PROF1_HUMAN	Profilin-1 OS=Homo sapiens GN=PFN1 PE=1 SV=2	15.0	9.4	100.0 (M:100.0)
92	RS16_HUMAN	40S ribosomal protein S16 OS=Homo sapiens GN=RPS16 PE=1 SV=2	16.4	10.8	98.7 (M:98.7)
93	PARK7_HUMAN	Protein deglycase DJ-1 OS=Homo sapiens GN=PARK7 PE=1 SV=2	19.9	6.4	97.4 (M:97.4)
94	SRSF1_HUMAN	Serine/arginine-rich splicing factor 1 OS=Homo sapiens GN=SRSF1 PE=1 SV=2	27.7	10.8	96.5 (M:96.5)
95	SRP14_HUMAN	Signal recognition particle 14 kDa protein OS=Homo sapiens GN=SRP14 PE=1 SV=2	14.6	10.6	95.8 (M:95.8)
96	SH3L3_HUMAN	SH3 domain-binding glutamic acid-rich-like protein 3 OS=Homo sapiens GN=SH3BGRL3 PE=1 SV=1	10.4	4.7	95.0 (M:95.0)
97	TPM3_HUMAN	Tropomyosin alpha-3 chain OS=Homo sapiens GN=TPM3 PE=1 SV=2	32.9	4.5	94.6 (M:94.6)
98	G3BP1_HUMAN	Ras GTPase-activating protein-binding protein 1 OS=Homo sapiens GN=G3BP1 PE=1 SV=1	52.1	5.3	90.2 (M:90.2)
99	NDKA_HUMAN	Nucleoside diphosphate kinase A OS=Homo sapiens GN=NME1 PE=1 SV=1	17.1	5.8	89.4 (M:89.4)
100	SRSF7_HUMAN	Serine/arginine-rich splicing factor 7 OS=Homo sapiens GN=SRSF7 PE=1 SV=1	27.4	12.4	87.8 (M:87.8)
101	K2C6A_HUMAN	Keratin, type II cytoskeletal 6A OS=Homo sapiens GN=KRT6A PE=1 SV=3	60.0	8.9	87.3 (M:87.3)
102	PRDX5_HUMAN	Peroxiredoxin-5, mitochondrial OS=Homo sapiens GN=PRDX5 PE=1 SV=4	22.1	9.9	85.0 (M:85.0)
103	RL6_HUMAN	60S ribosomal protein L6 OS=Homo sapiens GN=RPL6 PE=1 SV=3	32.7	11.1	84.6 (M:84.6)
104	PDIA1_HUMAN	Protein disulfide-isomerase OS=Homo sapiens GN=P4HB PE=1 SV=3	57.1	4.6	84.2 (M:84.2)
105	RS17_HUMAN	40S ribosomal protein S17 OS=Homo sapiens GN=RPS17 PE=1 SV=2	15.5	10.4	83.8 (M:83.8)
106	RL12_HUMAN	60S ribosomal protein L12 OS=Homo sapiens GN=RPL12 PE=1 SV=1	17.8	10.3	82.9 (M:82.9)
107	PSME1_HUMAN	Proteasome activator complex subunit 1 OS=Homo sapiens GN=PSME1 PE=1 SV=1	28.7	5.7	79.6 (M:79.6)
108	LDHB_HUMAN	L-lactate dehydrogenase B chain OS=Homo sapiens GN=LDHB PE=1 SV=2	36.6	5.7	79.2 (M:79.2)
109	RL7_HUMAN	60S ribosomal protein L7 OS=Homo sapiens GN=RPL7 PE=1 SV=1	29.2	11.1	77.3 (M:77.3)
110	RL24_HUMAN	60S ribosomal protein L24 OS=Homo sapiens GN=RPL24 PE=1 SV=1	17.8	12.0	76.7 (M:76.7)
111	SERPH_HUMAN	Serpin H1 OS=Homo sapiens GN=SERPINH1 PE=1 SV=2	46.4	9.3	76.5 (M:76.5)
112	RL10_HUMAN	60S ribosomal protein L10 OS=Homo sapiens GN=RPL10 PE=1 SV=4	24.6	11.0	75.5 (M:75.5)
113	VINC_HUMAN	Vinculin OS=Homo sapiens GN=VCL PE=1 SV=4	123.7	5.4	75.3 (M:75.3)
114	LAP2B_HUMAN	Lamina-associated polypeptide 2, isoforms beta/gamma OS=Homo sapiens GN=TMPO PE=1 SV=2	50.6	9.8	74.5 (M:74.5)
115	HP1B3_HUMAN	Heterochromatin protein 1-binding protein 3 OS=Homo sapiens GN=HP1BP3 PE=1 SV=1	61.2	10.2	74.1 (M:74.1)
116	LEG1_HUMAN	Galectin-1 OS=Homo sapiens GN=LGALS1 PE=1 SV=2	14.7	5.2	72.1 (M:72.1)
117	MT1E_HUMAN	Metallothionein-1E OS=Homo sapiens GN=MT1E PE=1 SV=1	6.0	10.5	71.0 (M:71.0)
118	GSTP1_HUMAN	Glutathione S-transferase P OS=Homo sapiens GN=GSTP1 PE=1 SV=2	23.3	5.3	71.0 (M:71.0)
119	PRDX1_HUMAN	Peroxiredoxin-1 OS=Homo sapiens GN=PRDX1 PE=1 SV=1	22.1	9.2	69.9 (M:69.9)
120	RL14_HUMAN	60S ribosomal protein L14 OS=Homo sapiens GN=RPL14 PE=1 SV=4	23.4	11.6	69.8 (M:69.8)
121	SRRM2_HUMAN	Serine/arginine repetitive matrix protein 2 OS=Homo sapiens GN=SRRM2 PE=1 SV=2	299.4	12.6	69.2 (M:69.2)
122	HBB_HUMAN	Hemoglobin subunit beta OS=Homo sapiens GN=HBB PE=1 SV=2	16.0	6.9	69.0 (M:69.0)
123	HBA_HUMAN	Hemoglobin subunit alpha OS=Homo sapiens GN=HBA1 PE=1 SV=2	15.2	9.4	68.2 (M:68.2)
124	AN32A_HUMAN	Acidic leucine-rich nuclear phosphoprotein 32 family member A OS=Homo sapiens GN=ANP32A PE=1 SV=1	28.6	3.8	66.3 (M:66.3)
125	SRS10_HUMAN	Serine/arginine-rich splicing factor 10 OS=Homo sapiens GN=SRSF10 PE=1 SV=1	31.3	11.8	64.4 (M:64.4)
126	DPY30_HUMAN	Protein dpy-30 homolog OS=Homo sapiens GN=DPY30 PE=1 SV=1	11.2	4.7	64.3 (M:64.3)
127	RS5_HUMAN	40S ribosomal protein S5 OS=Homo sapiens GN=RPS5 PE=1 SV=4	22.9	10.4	63.8 (M:63.8)
128	RL34_HUMAN	60S ribosomal protein L34 OS=Homo sapiens GN=RPL34 PE=1 SV=3	13.3	12.4	61.3 (M:61.3)
129	HS90B_HUMAN	Heat shock protein HSP 90-beta OS=Homo sapiens GN=HSP90AB1 PE=1 SV=4	83.2	4.8	61.2 (M:61.2)
130	NSF1C_HUMAN	NSFL1 cofactor p47 OS=Homo sapiens GN=NSFL1C PE=1 SV=2	40.5	4.9	61.0 (M:61.0)
131	IF4B_HUMAN	Eukaryotic translation initiation factor 4B OS=Homo sapiens GN=EIF4B PE=1 SV=2	69.1	5.4	60.3 (M:60.3)
132	RL18A_HUMAN	60S ribosomal protein L18a OS=Homo sapiens GN=RPL18A PE=1 SV=2	20.7	11.7	60.2 (M:60.2)
133	SRSF5_HUMAN	Serine/arginine-rich splicing factor 5 OS=Homo sapiens GN=SRSF5 PE=1 SV=1	31.2	12.2	59.6 (M:59.6)
134	RS29_HUMAN	40S ribosomal protein S29 OS=Homo sapiens GN=RPS29 PE=1 SV=2	6.7	11.8	58.7 (M:58.7)
135	HMGA2_HUMAN	High mobility group protein HMGI-C OS=Homo sapiens GN=HMGA2 PE=1 SV=1	11.8	11.1	58.6 (M:58.6)
136	RL40_HUMAN	Ubiquitin-60S ribosomal protein L40 OS=Homo sapiens GN=UBA52 PE=1 SV=2	14.7	10.7	58.0 (M:58.0)
137	DDX17_HUMAN	Probable ATP-dependent RNA helicase DDX17 OS=Homo sapiens GN=DDX17 PE=1 SV=2	80.2	9.3	57.4 (M:57.4)
138	RS18_HUMAN	40S ribosomal protein S18 OS=Homo sapiens GN=RPS18 PE=1 SV=3	17.7	11.5	56.9 (M:56.9)
139	BAZ1A_HUMAN	Bromodomain adjacent to zinc finger domain protein 1A OS=Homo sapiens GN=BAZ1A PE=1 SV=2	178.6	6.2	55.5 (M:55.5)
140	HNRPC_HUMAN	Heterogeneous nuclear ribonucleoproteins C1/C2 OS=Homo sapiens GN=HNRNPC PE=1 SV=4	33.6	4.8	53.2 (M:53.2)
141	CD166_HUMAN	CD166 antigen OS=Homo sapiens GN=ALCAM PE=1 SV=2	65.1	5.9	52.5 (M:52.5)
142	SRSF2_HUMAN	Serine/arginine-rich splicing factor 2 OS=Homo sapiens GN=SRSF2 PE=1 SV=4	25.5	12.4	52.5 (M:52.5)
143	PDIA6_HUMAN	Protein disulfide-isomerase A6 OS=Homo sapiens GN=PDIA6 PE=1 SV=1	48.1	4.8	52.2 (M:52.2)
144	RS11_HUMAN	40S ribosomal protein S11 OS=Homo sapiens GN=RPS11 PE=1 SV=3	18.4	11.0	51.8 (M:51.8)
145	HMGN2_HUMAN	Non-histone chromosomal protein HMG-17 OS=Homo sapiens GN=HMGN2 PE=1 SV=3	9.4	10.5	51.2 (M:51.2)
146	NONO_HUMAN	Non-POU domain-containing octamer-binding protein OS=Homo sapiens GN=NONO PE=1 SV=4	54.2	9.6	50.7 (M:50.7)
147	PTRF_HUMAN	Polymerase I and transcript release factor OS=Homo sapiens GN=PTRF PE=1 SV=1	43.4	5.4	50.7 (M:50.7)
148	NOLC1_HUMAN	Nucleolar and coiled-body phosphoprotein 1 OS=Homo sapiens GN=NOLC1 PE=1 SV=2	73.6	10.0	49.6 (M:49.6)
149	RL27A_HUMAN	60S ribosomal protein L27a OS=Homo sapiens GN=RPL27A PE=1 SV=2	16.6	11.8	47.9 (M:47.9)
150	EFHD2_HUMAN	EF-hand domain-containing protein D2 OS=Homo sapiens GN=EFHD2 PE=1 SV=1	26.7	5.0	47.6 (M:47.6)
151	LMNB2_HUMAN	Lamin-B2 OS=Homo sapiens GN=LMNB2 PE=1 SV=4	69.9	5.4	47.5 (M:47.5)
152	1B57_HUMAN	HLA class I histocompatibility antigen, B-57 alpha chain OS=Homo sapiens GN=HLA-B PE=1 SV=1	40.2	5.9	46.9 (M:46.9)
153	MATR3_HUMAN	Matrin-3 OS=Homo sapiens GN=MATR3 PE=1 SV=2	94.6	5.8	46.6 (M:46.6)
154	RL22_HUMAN	60S ribosomal protein L22 OS=Homo sapiens GN=RPL22 PE=1 SV=2	14.8	9.7	46.0 (M:46.0)
155	TRFL_HUMAN	Lactotransferrin OS=Homo sapiens GN=LTF PE=1 SV=6	78.1	9.6	45.9 (M:45.9)
156	ITIH2_HUMAN	Inter-alpha-trypsin inhibitor heavy chain H2 OS=Homo sapiens GN=ITIH2 PE=1 SV=2	106.4	6.4	45.2 (M:45.2)
157	TBA4A_HUMAN	Tubulin alpha-4A chain OS=Homo sapiens GN=TUBA4A PE=1 SV=1	49.9	4.8	45.0 (M:45.0)
158	TRI13_HUMAN	E3 ubiquitin-protein ligase TRIM13 OS=Homo sapiens GN=TRIM13 PE=1 SV=2	47.0	5.7	44.5 (M:44.5)
159	RL35A_HUMAN	60S ribosomal protein L35a OS=Homo sapiens GN=RPL35A PE=1 SV=2	12.5	11.7	44.5 (M:44.5)
160	THOC4_HUMAN	THO complex subunit 4 OS=Homo sapiens GN=ALYREF PE=1 SV=3	26.9	11.6	44.3 (M:44.3)
161	TBA1C_HUMAN	Tubulin alpha-1C chain OS=Homo sapiens GN=TUBA1C PE=1 SV=1	49.9	4.8	43.1 (M:43.1)
162	IPYR_HUMAN	Inorganic pyrophosphatase OS=Homo sapiens GN=PPA1 PE=1 SV=2	32.6	5.5	42.5 (M:42.5)
163	FETUA_HUMAN	Alpha-2-HS-glycoprotein OS=Homo sapiens GN=AHSG PE=1 SV=1	39.3	5.4	42.4 (M:42.4)
164	MOES_HUMAN	Moesin OS=Homo sapiens GN=MSN PE=1 SV=3	67.8	6.0	41.6 (M:41.6)
165	RS21_HUMAN	40S ribosomal protein S21 OS=Homo sapiens GN=RPS21 PE=1 SV=1	9.1	9.7	41.5 (M:41.5)
166	BOLA2_HUMAN	BolA-like protein 2 OS=Homo sapiens GN=BOLA2 PE=1 SV=1	10.1	6.1	41.3 (M:41.3)
167	RLA1_HUMAN	60S acidic ribosomal protein P1 OS=Homo sapiens GN=RPLP1 PE=1 SV=1	11.5	4.0	40.6 (M:40.6)
168	AT1A3_HUMAN	Sodium/potassium-transporting ATPase subunit alpha-3 OS=Homo sapiens GN=ATP1A3 PE=1 SV=3	111.7	5.1	40.6 (M:40.6)
169	RL23_HUMAN	60S ribosomal protein L23 OS=Homo sapiens GN=RPL23 PE=1 SV=1	14.9	11.2	40.1 (M:40.1)
170	PQBP1_HUMAN	Polyglutamine-binding protein 1 OS=Homo sapiens GN=PQBP1 PE=1 SV=1	30.5	5.9	39.7 (M:39.7)
171	RL35_HUMAN	60S ribosomal protein L35 OS=Homo sapiens GN=RPL35 PE=1 SV=2	14.5	11.5	39.3 (M:39.3)
172	RS8_HUMAN	40S ribosomal protein S8 OS=Homo sapiens GN=RPS8 PE=1 SV=2	24.2	11.0	39.2 (M:39.2)
173	RS2_HUMAN	40S ribosomal protein S2 OS=Homo sapiens GN=RPS2 PE=1 SV=2	31.3	11.0	38.9 (M:38.9)
174	RL15_HUMAN	60S ribosomal protein L15 OS=Homo sapiens GN=RPL15 PE=1 SV=2	24.1	12.2	38.8 (M:38.8)
175	TCPZ_HUMAN	T-complex protein 1 subunit zeta OS=Homo sapiens GN=CCT6A PE=1 SV=3	58.0	6.2	38.6 (M:38.6)
176	LUZP1_HUMAN	Leucine zipper protein 1 OS=Homo sapiens GN=LUZP1 PE=1 SV=2	120.2	9.4	38.4 (M:38.4)
177	FKBP3_HUMAN	Peptidyl-prolyl cis-trans isomerase FKBP3 OS=Homo sapiens GN=FKBP3 PE=1 SV=1	25.2	9.8	38.0 (M:38.0)
178	CAZA1_HUMAN	F-actin-capping protein subunit alpha-1 OS=Homo sapiens GN=CAPZA1 PE=1 SV=3	32.9	5.4	37.9 (M:37.9)
179	PDCD5_HUMAN	Programmed cell death protein 5 OS=Homo sapiens GN=PDCD5 PE=1 SV=3	14.3	5.7	36.3 (M:36.3)
180	A2AP_HUMAN	Alpha-2-antiplasmin OS=Homo sapiens GN=SERPINF2 PE=1 SV=3	54.5	5.9	36.1 (M:36.1)
181	GLPK3_HUMAN	Glycerol kinase 3 OS=Homo sapiens GN=GK3P PE=2 SV=2	60.6	6.0	35.9 (M:35.9)
182	K1C16_HUMAN	Keratin, type I cytoskeletal 16 OS=Homo sapiens GN=KRT16 PE=1 SV=4	51.2	4.8	34.5 (M:34.5)
183	ERCC6_HUMAN	DNA excision repair protein ERCC-6 OS=Homo sapiens GN=ERCC6 PE=1 SV=1	168.3	9.0	34.0 (M:34.0)
184	TBCA_HUMAN	Tubulin-specific chaperone A OS=Homo sapiens GN=TBCA PE=1 SV=3	12.8	5.1	33.9 (M:33.9)
185	RS24_HUMAN	40S ribosomal protein S24 OS=Homo sapiens GN=RPS24 PE=1 SV=1	15.4	11.3	33.4 (M:33.4)
186	OLIG1_HUMAN	Oligodendrocyte transcription factor 1 OS=Homo sapiens GN=OLIG1 PE=1 SV=2	27.9	10.5	32.4 (M:32.4)
187	G6PI_HUMAN	Glucose-6-phosphate isomerase OS=Homo sapiens GN=GPI PE=1 SV=4	63.1	9.1	32.3 (M:32.3)
188	RL36_HUMAN	60S ribosomal protein L36 OS=Homo sapiens GN=RPL36 PE=1 SV=3	12.2	12.2	32.2 (M:32.2)
189	PFD6_HUMAN	Prefoldin subunit 6 OS=Homo sapiens GN=PFDN6 PE=1 SV=1	14.6	9.4	31.9 (M:31.9)
190	RL4_HUMAN	60S ribosomal protein L4 OS=Homo sapiens GN=RPL4 PE=1 SV=5	47.7	11.8	31.4 (M:31.4)
191	TPD54_HUMAN	Tumor protein D54 OS=Homo sapiens GN=TPD52L2 PE=1 SV=2	22.2	5.1	31.0 (M:31.0)
192	TEBP_HUMAN	Prostaglandin E synthase 3 OS=Homo sapiens GN=PTGES3 PE=1 SV=1	18.7	4.2	30.6 (M:30.6)
193	MYL6_HUMAN	Myosin light polypeptide 6 OS=Homo sapiens GN=MYL6 PE=1 SV=2	16.9	4.4	30.4 (M:30.4)
194	HINT1_HUMAN	Histidine triad nucleotide-binding protein 1 OS=Homo sapiens GN=HINT1 PE=1 SV=2	13.8	6.5	30.2 (M:30.2)
195	TTC1_HUMAN	Tetratricopeptide repeat protein 1 OS=Homo sapiens GN=TTC1 PE=1 SV=1	33.5	4.6	30.1 (M:30.1)
196	APEX1_HUMAN	DNA-(apurinic or apyrimidinic site) lyase OS=Homo sapiens GN=APEX1 PE=1 SV=2	35.5	9.2	29.9 (M:29.9)
197	PADI1_HUMAN	Protein-arginine deiminase type-1 OS=Homo sapiens GN=PADI1 PE=2 SV=2	74.6	6.1	29.4 (M:29.4)
198	IF5AL_HUMAN	Eukaryotic translation initiation factor 5A-1-like OS=Homo sapiens GN=EIF5AL1 PE=2 SV=2	16.8	4.7	29.3 (M:29.3)
199	SNR27_HUMAN	U4/U6.U5 small nuclear ribonucleoprotein 27 kDa protein OS=Homo sapiens GN=SNRNP27 PE=1 SV=1	18.8	12.1	28.9 (M:28.9)
200	RL13A_HUMAN	60S ribosomal protein L13a OS=Homo sapiens GN=RPL13A PE=1 SV=2	23.6	11.5	28.1 (M:28.1)
201	RL21_HUMAN	60S ribosomal protein L21 OS=Homo sapiens GN=RPL21 PE=1 SV=2	18.6	11.0	27.9 (M:27.9)
202	SACA1_HUMAN	Sperm acrosome membrane-associated protein 1 OS=Homo sapiens GN=SPACA1 PE=1 SV=1	32.1	4.4	27.7 (M:27.7)
203	BAG3_HUMAN	BAG family molecular chaperone regulator 3 OS=Homo sapiens GN=BAG3 PE=1 SV=3	61.6	6.5	27.6 (M:27.6)
204	CLCB_HUMAN	Clathrin light chain B OS=Homo sapiens GN=CLTB PE=1 SV=1	25.2	4.4	27.3 (M:27.3)
205	CHCH2_HUMAN	Coiled-coil-helix-coiled-coil-helix domain-containing protein 2 OS=Homo sapiens GN=CHCHD2 PE=1 SV=1	15.5	10.9	27.2 (M:27.2)
206	RS30_HUMAN	40S ribosomal protein S30 OS=Homo sapiens GN=FAU PE=1 SV=1	6.6	12.6	27.0 (M:27.0)
207	SNX4_HUMAN	Sorting nexin-4 OS=Homo sapiens GN=SNX4 PE=1 SV=1	51.9	5.6	27.0 (M:27.0)
208	MTOR_HUMAN	Serine/threonine-protein kinase mTOR OS=Homo sapiens GN=MTOR PE=1 SV=1	288.7	6.8	26.8 (M:26.8)
209	T151A_HUMAN	Transmembrane protein 151A OS=Homo sapiens GN=TMEM151A PE=2 SV=1	51.2	9.3	26.7 (M:26.7)
210	K0907_HUMAN	UPF0469 protein KIAA0907 OS=Homo sapiens GN=KIAA0907 PE=1 SV=1	64.8	9.4	26.5 (M:26.5)
211	PAN3_HUMAN	PAB-dependent poly(A)-specific ribonuclease subunit PAN3 OS=Homo sapiens GN=PAN3 PE=1 SV=3	95.6	9.5	25.9 (M:25.9)
212	YP023_HUMAN	Putative uncharacterized protein FLJ34945 OS=Homo sapiens PE=2 SV=1	14.2	12.6	25.7 (M:25.7)
213	ERH_HUMAN	Enhancer of rudimentary homolog OS=Homo sapiens GN=ERH PE=1 SV=1	12.3	5.6	25.6 (M:25.6)
214	PCBP1_HUMAN	Poly(rC)-binding protein 1 OS=Homo sapiens GN=PCBP1 PE=1 SV=2	37.5	6.8	25.4 (M:25.4)
215	CP250_HUMAN	Centrosome-associated protein CEP250 OS=Homo sapiens GN=CEP250 PE=1 SV=2	281.0	4.9	25.4 (M:25.4)
216	CU129_HUMAN	Putative uncharacterized protein encoded by LINC00479 OS=Homo sapiens GN=LINC00479 PE=5 SV=2	15.2	8.3	25.3 (M:25.3)
217	TCRGL_HUMAN	Transcription elongation regulator 1-like protein OS=Homo sapiens GN=TCERG1L PE=2 SV=2	65.6	10.5	24.8 (M:24.8)
218	TMOD3_HUMAN	Tropomodulin-3 OS=Homo sapiens GN=TMOD3 PE=1 SV=1	39.6	4.9	24.4 (M:24.4)
219	VAPB_HUMAN	Vesicle-associated membrane protein-associated protein B/C OS=Homo sapiens GN=VAPB PE=1 SV=3	27.2	7.7	24.2 (M:24.2)
220	KIF4B_HUMAN	Chromosome-associated kinesin KIF4B OS=Homo sapiens GN=KIF4B PE=2 SV=2	139.9	5.8	23.8 (M:23.8)
221	AKIP1_HUMAN	A-kinase-interacting protein 1 OS=Homo sapiens GN=AKIP1 PE=1 SV=2	23.1	9.2	23.6 (M:23.6)
222	ZNF2_HUMAN	Zinc finger protein 2 OS=Homo sapiens GN=ZNF2 PE=1 SV=4	48.8	10.1	23.5 (M:23.5)
223	AP1S3_HUMAN	AP-1 complex subunit sigma-3 OS=Homo sapiens GN=AP1S3 PE=1 SV=1	18.3	6.4	23.4 (M:23.4)
224	41_HUMAN	Protein 4.1 OS=Homo sapiens GN=EPB41 PE=1 SV=4	97.0	5.3	23.4 (M:23.4)
225	THRB_HUMAN	Prothrombin OS=Homo sapiens GN=F2 PE=1 SV=2	70.0	5.6	23.1 (M:23.1)
226	S39A1_HUMAN	Zinc transporter ZIP1 OS=Homo sapiens GN=SLC39A1 PE=1 SV=1	34.2	5.6	22.8 (M:22.8)
227	CI163_HUMAN	Uncharacterized protein C9orf163 OS=Homo sapiens GN=C9orf163 PE=2 SV=1	22.1	12.9	22.6 (M:22.6)
228	GRDN_HUMAN	Girdin OS=Homo sapiens GN=CCDC88A PE=1 SV=2	215.9	5.8	22.6 (M:22.6)
229	MDHM_HUMAN	Malate dehydrogenase, mitochondrial OS=Homo sapiens GN=MDH2 PE=1 SV=3	35.5	9.8	22.6 (M:22.6)
230	CCD15_HUMAN	Coiled-coil domain-containing protein 15 OS=Homo sapiens GN=CCDC15 PE=2 SV=2	110.4	6.0	22.4 (M:22.4)
231	RHG23_HUMAN	Rho GTPase-activating protein 23 OS=Homo sapiens GN=ARHGAP23 PE=1 SV=2	162.1	10.1	21.9 (M:21.9)
232	ZRAS1_HUMAN	Putative uncharacterized protein ZNRD1-AS1 OS=Homo sapiens GN=ZNRD1-AS1 PE=5 SV=1	22.4	10.6	21.7 (M:21.7)
233	AKTIP_HUMAN	AKT-interacting protein OS=Homo sapiens GN=AKTIP PE=1 SV=1	33.1	9.8	21.7 (M:21.7)
234	SUSD1_HUMAN	Sushi domain-containing protein 1 OS=Homo sapiens GN=SUSD1 PE=1 SV=1	82.7	6.0	21.4 (M:21.4)
235	RS20_HUMAN	40S ribosomal protein S20 OS=Homo sapiens GN=RPS20 PE=1 SV=1	13.4	10.7	21.3 (M:21.3)
236	H2AY_HUMAN	Core histone macro-H2A.1 OS=Homo sapiens GN=H2AFY PE=1 SV=4	39.6	10.3	21.3 (M:21.3)
237	ZN318_HUMAN	Zinc finger protein 318 OS=Homo sapiens GN=ZNF318 PE=1 SV=2	251.0	6.8	21.2 (M:21.2)
238	LRMP_HUMAN	Lymphoid-restricted membrane protein OS=Homo sapiens GN=LRMP PE=1 SV=3	62.1	5.5	21.2 (M:21.2)
239	CH034_HUMAN	Uncharacterized protein C8orf34 OS=Homo sapiens GN=C8orf34 PE=2 SV=2	50.5	4.8	21.1 (M:21.1)
240	OFUT1_HUMAN	GDP-fucose protein O-fucosyltransferase 1 OS=Homo sapiens GN=POFUT1 PE=1 SV=1	43.9	9.5	20.9 (M:20.9)
241	TBCD1_HUMAN	TBC1 domain family member 1 OS=Homo sapiens GN=TBC1D1 PE=1 SV=2	133.0	6.5	20.6 (M:20.6)
242	RS14_HUMAN	40S ribosomal protein S14 OS=Homo sapiens GN=RPS14 PE=1 SV=3	16.3	10.9	20.6 (M:20.6)
243	SSFA2_HUMAN	Sperm-specific antigen 2 OS=Homo sapiens GN=SSFA2 PE=1 SV=3	138.3	5.0	20.5 (M:20.5)
244	KAD2_HUMAN	Adenylate kinase 2, mitochondrial OS=Homo sapiens GN=AK2 PE=1 SV=2	26.5	8.9	20.4 (M:20.4)
245	CATA_HUMAN	Catalase OS=Homo sapiens GN=CAT PE=1 SV=3	59.7	7.0	20.4 (M:20.4)
246	RS27_HUMAN	40S ribosomal protein S27 OS=Homo sapiens GN=RPS27 PE=1 SV=3	9.5	10.7	20.3 (M:20.3)
247	AKAP9_HUMAN	A-kinase anchor protein 9 OS=Homo sapiens GN=AKAP9 PE=1 SV=3	453.4	4.8	20.3 (M:20.3)
248	DAZP1_HUMAN	DAZ-associated protein 1 OS=Homo sapiens GN=DAZAP1 PE=1 SV=1	43.4	9.4	20.1 (M:20.1)
249	CECR1_HUMAN	Adenosine deaminase CECR1 OS=Homo sapiens GN=CECR1 PE=1 SV=2	58.9	8.6	20.0 (M:20.0)
250	SPA12_HUMAN	Serpin A12 OS=Homo sapiens GN=SERPINA12 PE=1 SV=1	47.1	9.8	19.9 (M:19.9)
251	MYPC2_HUMAN	Myosin-binding protein C, fast-type OS=Homo sapiens GN=MYBPC2 PE=1 SV=2	128.0	8.2	19.7 (M:19.7)
252	ELAV1_HUMAN	ELAV-like protein 1 OS=Homo sapiens GN=ELAVL1 PE=1 SV=2	36.1	9.8	19.6 (M:19.6)
253	TRI34_HUMAN	Tripartite motif-containing protein 34 OS=Homo sapiens GN=TRIM34 PE=1 SV=2	56.8	8.5	19.6 (M:19.6)
254	THIO_HUMAN	Thioredoxin OS=Homo sapiens GN=TXN PE=1 SV=3	11.7	4.7	19.5 (M:19.5)
255	LAMP1_HUMAN	Lysosome-associated membrane glycoprotein 1 OS=Homo sapiens GN=LAMP1 PE=1 SV=3	44.9	9.9	19.5 (M:19.5)
256	SPAG5_HUMAN	Sperm-associated antigen 5 OS=Homo sapiens GN=SPAG5 PE=1 SV=2	134.3	4.8	19.4 (M:19.4)
257	ATAD2_HUMAN	ATPase family AAA domain-containing protein 2 OS=Homo sapiens GN=ATAD2 PE=1 SV=1	158.5	5.9	19.3 (M:19.3)
258	LDHA_HUMAN	L-lactate dehydrogenase A chain OS=Homo sapiens GN=LDHA PE=1 SV=2	36.7	9.3	19.3 (M:19.3)
259	MAT2B_HUMAN	Methionine adenosyltransferase 2 subunit beta OS=Homo sapiens GN=MAT2B PE=1 SV=1	37.5	7.1	19.3 (M:19.3)
260	WNK4_HUMAN	Serine/threonine-protein kinase WNK4 OS=Homo sapiens GN=WNK4 PE=1 SV=1	134.7	5.2	19.2 (M:19.2)
261	RAB32_HUMAN	Ras-related protein Rab-32 OS=Homo sapiens GN=RAB32 PE=1 SV=3	25.0	6.1	19.1 (M:19.1)
262	BPTF_HUMAN	Nucleosome-remodeling factor subunit BPTF OS=Homo sapiens GN=BPTF PE=1 SV=3	338.1	6.1	19.1 (M:19.1)
263	ILRL2_HUMAN	Interleukin-1 receptor-like 2 OS=Homo sapiens GN=IL1RL2 PE=1 SV=2	65.4	7.9	19.0 (M:19.0)
264	SF3B2_HUMAN	Splicing factor 3B subunit 2 OS=Homo sapiens GN=SF3B2 PE=1 SV=2	100.2	5.4	19.0 (M:19.0)
265	ZN788_HUMAN	Zinc finger protein 788 OS=Homo sapiens GN=ZNF788 PE=2 SV=2	71.9	10.6	18.8 (M:18.8)
266	FUS_HUMAN	RNA-binding protein FUS OS=Homo sapiens GN=FUS PE=1 SV=1	53.4	9.7	18.8 (M:18.8)
267	RL36A_HUMAN	60S ribosomal protein L36a OS=Homo sapiens GN=RPL36A PE=1 SV=2	12.4	11.7	18.8 (M:18.8)
268	SG223_HUMAN	Tyrosine-protein kinase SgK223 OS=Homo sapiens GN=SGK223 PE=1 SV=4	149.5	6.8	18.7 (M:18.7)
269	PJVK_HUMAN	Pejvakin OS=Homo sapiens GN=DFNB59 PE=1 SV=1	39.9	10.0	18.7 (M:18.7)
270	VIR_HUMAN	Protein virilizer homolog OS=Homo sapiens GN=KIAA1429 PE=1 SV=2	201.9	4.8	18.6 (M:18.6)
271	HNRH1_HUMAN	Heterogeneous nuclear ribonucleoprotein H OS=Homo sapiens GN=HNRNPH1 PE=1 SV=4	49.2	5.9	18.5 (M:18.5)
272	SAP_HUMAN	Prosaposin OS=Homo sapiens GN=PSAP PE=1 SV=2	58.1	4.9	18.5 (M:18.5)
273	IRS2_HUMAN	Insulin receptor substrate 2 OS=Homo sapiens GN=IRS2 PE=1 SV=2	137.2	9.7	18.4 (M:18.4)
274	KHDR1_HUMAN	KH domain-containing, RNA-binding, signal transduction-associated protein 1 OS=Homo sapiens GN=KHDRBS1 PE=1 SV=1	48.2	9.2	18.4 (M:18.4)
275	PA24B_HUMAN	Cytosolic phospholipase A2 beta OS=Homo sapiens GN=PLA2G4B PE=1 SV=2	87.9	5.6	18.3 (M:18.3)
276	KI67_HUMAN	Antigen KI-67 OS=Homo sapiens GN=MKI67 PE=1 SV=2	358.5	10.1	18.3 (M:18.3)
277	ASXL2_HUMAN	Putative Polycomb group protein ASXL2 OS=Homo sapiens GN=ASXL2 PE=1 SV=1	153.7	9.8	18.2 (M:18.2)
278	SRSF9_HUMAN	Serine/arginine-rich splicing factor 9 OS=Homo sapiens GN=SRSF9 PE=1 SV=1	25.5	9.2	18.1 (M:18.1)
279	THS7B_HUMAN	Thrombospondin type-1 domain-containing protein 7B OS=Homo sapiens GN=THSD7B PE=2 SV=2	179.3	9.4	18.0 (M:18.0)
280	BCR_HUMAN	Breakpoint cluster region protein OS=Homo sapiens GN=BCR PE=1 SV=2	142.7	6.6	17.9 (M:17.9)
281	TC1D4_HUMAN	Tctex1 domain-containing protein 4 OS=Homo sapiens GN=TCTEX1D4 PE=1 SV=1	23.3	11.1	17.8 (M:17.8)
282	RL37_HUMAN	60S ribosomal protein L37 OS=Homo sapiens GN=RPL37 PE=1 SV=2	11.1	12.7	17.7 (M:17.7)
283	PAN2_HUMAN	PAB-dependent poly(A)-specific ribonuclease subunit PAN2 OS=Homo sapiens GN=PAN2 PE=1 SV=3	135.3	5.6	17.7 (M:17.7)
284	DOT1L_HUMAN	Histone-lysine N-methyltransferase, H3 lysine-79 specific OS=Homo sapiens GN=DOT1L PE=1 SV=2	184.7	10.0	17.7 (M:17.7)
285	ORC5_HUMAN	Origin recognition complex subunit 5 OS=Homo sapiens GN=ORC5 PE=1 SV=1	50.3	8.6	17.6 (M:17.6)
286	PR14L_HUMAN	Protein PRR14L OS=Homo sapiens GN=PRR14L PE=1 SV=1	237.2	5.9	17.6 (M:17.6)
287	HNRH3_HUMAN	Heterogeneous nuclear ribonucleoprotein H3 OS=Homo sapiens GN=HNRNPH3 PE=1 SV=2	36.9	6.4	17.6 (M:17.6)
288	TRPC5_HUMAN	Short transient receptor potential channel 5 OS=Homo sapiens GN=TRPC5 PE=1 SV=1	111.3	7.1	17.5 (M:17.5)
289	ABHD1_HUMAN	Protein ABHD1 OS=Homo sapiens GN=ABHD1 PE=1 SV=2	45.2	5.8	17.5 (M:17.5)
290	SENP3_HUMAN	Sentrin-specific protease 3 OS=Homo sapiens GN=SENP3 PE=1 SV=2	65.0	9.7	17.4 (M:17.4)
291	ACOXL_HUMAN	Acyl-coenzyme A oxidase-like protein OS=Homo sapiens GN=ACOXL PE=2 SV=3	61.8	9.5	17.4 (M:17.4)
292	O52R1_HUMAN	Olfactory receptor 52R1 OS=Homo sapiens GN=OR52R1 PE=3 SV=2	34.9	9.7	17.4 (M:17.4)
293	TSK_HUMAN	Tsukushin OS=Homo sapiens GN=TSKU PE=2 SV=3	37.8	6.4	17.4 (M:17.4)
294	VWF_HUMAN	von Willebrand factor OS=Homo sapiens GN=VWF PE=1 SV=4	309.1	5.2	17.4 (M:17.4)
295	TCPG_HUMAN	T-complex protein 1 subunit gamma OS=Homo sapiens GN=CCT3 PE=1 SV=4	60.5	6.1	17.4 (M:17.4)
296	R3HD2_HUMAN	R3H domain-containing protein 2 OS=Homo sapiens GN=R3HDM2 PE=1 SV=3	106.9	9.6	17.4 (M:17.4)
297	OPRD_HUMAN	Delta-type opioid receptor OS=Homo sapiens GN=OPRD1 PE=1 SV=4	40.3	10.3	17.3 (M:17.3)
298	PERM_HUMAN	Myeloperoxidase OS=Homo sapiens GN=MPO PE=1 SV=1	83.8	10.1	17.3 (M:17.3)
299	CF050_HUMAN	Putative uncharacterized protein C6orf50 OS=Homo sapiens GN=C6orf50 PE=5 SV=1	12.4	9.3	17.2 (M:17.2)
300	SC11A_HUMAN	Signal peptidase complex catalytic subunit SEC11A OS=Homo sapiens GN=SEC11A PE=1 SV=1	20.6	9.9	17.1 (M:17.1)
301	NAC3_HUMAN	Sodium/calcium exchanger 3 OS=Homo sapiens GN=SLC8A3 PE=1 SV=2	102.9	4.9	17.1 (M:17.1)
302	ICAL_HUMAN	Calpastatin OS=Homo sapiens GN=CAST PE=1 SV=4	76.5	4.8	17.1 (M:17.1)
303	AT2A1_HUMAN	Sarcoplasmic/endoplasmic reticulum calcium ATPase 1 OS=Homo sapiens GN=ATP2A1 PE=1 SV=1	110.2	4.9	17.1 (M:17.1)
304	MFRN1_HUMAN	Mitoferrin-1 OS=Homo sapiens GN=SLC25A37 PE=2 SV=2	37.3	9.8	17.0 (M:17.0)
305	T10IP_HUMAN	Testis-specific protein 10-interacting protein OS=Homo sapiens GN=TSGA10IP PE=1 SV=2	62.3	10.1	17.0 (M:17.0)
306	NR1D1_HUMAN	Nuclear receptor subfamily 1 group D member 1 OS=Homo sapiens GN=NR1D1 PE=1 SV=1	66.8	9.9	17.0 (M:17.0)
307	F120A_HUMAN	Constitutive coactivator of PPAR-gamma-like protein 1 OS=Homo sapiens GN=FAM120A PE=1 SV=2	121.8	9.8	17.0 (M:17.0)
308	MAST1_HUMAN	Microtubule-associated serine/threonine-protein kinase 1 OS=Homo sapiens GN=MAST1 PE=1 SV=2	170.6	9.4	17.0 (M:17.0)
309	MKS1_HUMAN	Meckel syndrome type 1 protein OS=Homo sapiens GN=MKS1 PE=1 SV=2	64.5	6.0	16.9 (M:16.9)
310	CA112_HUMAN	Uncharacterized protein C1orf112 OS=Homo sapiens GN=C1orf112 PE=1 SV=1	96.5	5.6	16.9 (M:16.9)
311	SRP09_HUMAN	Signal recognition particle 9 kDa protein OS=Homo sapiens GN=SRP9 PE=1 SV=2	10.1	9.1	16.9 (M:16.9)
312	FANCJ_HUMAN	Fanconi anemia group J protein OS=Homo sapiens GN=BRIP1 PE=1 SV=1	140.8	6.5	16.8 (M:16.8)
313	PSIP1_HUMAN	PC4 and SFRS1-interacting protein OS=Homo sapiens GN=PSIP1 PE=1 SV=1	60.1	9.7	16.8 (M:16.8)
314	TOR1B_HUMAN	Torsin-1B OS=Homo sapiens GN=TOR1B PE=1 SV=2	38.0	9.5	16.7 (M:16.7)
315	ZN407_HUMAN	Zinc finger protein 407 OS=Homo sapiens GN=ZNF407 PE=1 SV=2	247.2	6.0	16.7 (M:16.7)
316	CQ047_HUMAN	Uncharacterized protein C17orf47 OS=Homo sapiens GN=C17orf47 PE=2 SV=3	63.1	9.9	16.7 (M:16.7)
317	ALPK2_HUMAN	Alpha-protein kinase 2 OS=Homo sapiens GN=ALPK2 PE=2 SV=3	236.9	5.0	16.6 (M:16.6)
318	TCP4_HUMAN	Activated RNA polymerase II transcriptional coactivator p15 OS=Homo sapiens GN=SUB1 PE=1 SV=3	14.4	10.1	16.6 (M:16.6)
319	VPS18_HUMAN	Vacuolar protein sorting-associated protein 18 homolog OS=Homo sapiens GN=VPS18 PE=1 SV=2	110.1	5.7	16.6 (M:16.6)
320	ABCAC_HUMAN	ATP-binding cassette sub-family A member 12 OS=Homo sapiens GN=ABCA12 PE=1 SV=3	293.0	8.6	16.6 (M:16.6)
321	CARD9_HUMAN	Caspase recruitment domain-containing protein 9 OS=Homo sapiens GN=CARD9 PE=1 SV=2	62.2	5.7	16.5 (M:16.5)
322	CCAR2_HUMAN	Cell cycle and apoptosis regulator protein 2 OS=Homo sapiens GN=CCAR2 PE=1 SV=2	102.8	5.0	16.5 (M:16.5)
323	DYDC1_HUMAN	DPY30 domain-containing protein 1 OS=Homo sapiens GN=DYDC1 PE=1 SV=1	20.9	4.5	16.4 (M:16.4)
324	DNLI3_HUMAN	DNA ligase 3 OS=Homo sapiens GN=LIG3 PE=1 SV=2	112.8	10.0	16.4 (M:16.4)
325	ENOX1_HUMAN	Ecto-NOX disulfide-thiol exchanger 1 OS=Homo sapiens GN=ENOX1 PE=1 SV=1	73.3	5.3	16.3 (M:16.3)
326	MAP4_HUMAN	Microtubule-associated protein 4 OS=Homo sapiens GN=MAP4 PE=1 SV=3	120.9	5.2	16.3 (M:16.3)
327	ADCK4_HUMAN	AarF domain-containing protein kinase 4 OS=Homo sapiens GN=ADCK4 PE=1 SV=2	60.0	7.0	16.2 (M:16.2)
328	EMIL1_HUMAN	EMILIN-1 OS=Homo sapiens GN=EMILIN1 PE=1 SV=2	106.6	4.9	16.2 (M:16.2)
329	MYH15_HUMAN	Myosin-15 OS=Homo sapiens GN=MYH15 PE=1 SV=5	224.5	5.6	16.1 (M:16.1)
330	KBL_HUMAN	2-amino-3-ketobutyrate coenzyme A ligase, mitochondrial OS=Homo sapiens GN=GCAT PE=1 SV=1	45.3	9.4	16.1 (M:16.1)
331	RT15_HUMAN	28S ribosomal protein S15, mitochondrial OS=Homo sapiens GN=MRPS15 PE=1 SV=1	29.8	11.0	16.0 (M:16.0)
332	TRFE_HUMAN	Serotransferrin OS=Homo sapiens GN=TF PE=1 SV=3	77.0	7.0	16.0 (M:16.0)
333	RIF1_HUMAN	Telomere-associated protein RIF1 OS=Homo sapiens GN=RIF1 PE=1 SV=2	274.3	5.3	15.9 (M:15.9)
334	CAC1G_HUMAN	Voltage-dependent T-type calcium channel subunit alpha-1G OS=Homo sapiens GN=CACNA1G PE=1 SV=3	262.3	6.1	15.9 (M:15.9)
335	ARHGQ_HUMAN	Rho guanine nucleotide exchange factor 26 OS=Homo sapiens GN=ARHGEF26 PE=1 SV=4	97.3	9.7	15.9 (M:15.9)
336	CEP83_HUMAN	Centrosomal protein of 83 kDa OS=Homo sapiens GN=CEP83 PE=1 SV=2	82.0	5.9	15.9 (M:15.9)
337	BNC1_HUMAN	Zinc finger protein basonuclin-1 OS=Homo sapiens GN=BNC1 PE=1 SV=2	110.9	7.1	15.9 (M:15.9)
338	TDR15_HUMAN	Tudor domain-containing protein 15 OS=Homo sapiens GN=TDRD15 PE=2 SV=1	221.6	6.7	15.8 (M:15.8)
339	PTBP1_HUMAN	Polypyrimidine tract-binding protein 1 OS=Homo sapiens GN=PTBP1 PE=1 SV=1	57.2	9.8	15.7 (M:15.7)
340	RSMB_HUMAN	Small nuclear ribonucleoprotein-associated proteins B and B' OS=Homo sapiens GN=SNRPB PE=1 SV=2	24.6	12.1	15.7 (M:15.7)
341	MPRIP_HUMAN	Myosin phosphatase Rho-interacting protein OS=Homo sapiens GN=MPRIP PE=1 SV=3	116.5	5.8	15.7 (M:15.7)
342	RGPS1_HUMAN	Ras-specific guanine nucleotide-releasing factor RalGPS1 OS=Homo sapiens GN=RALGPS1 PE=1 SV=1	62.1	9.8	15.7 (M:15.7)
343	SYEP_HUMAN	Bifunctional glutamate/proline--tRNA ligase OS=Homo sapiens GN=EPRS PE=1 SV=5	170.5	7.2	15.7 (M:15.7)
344	NUP85_HUMAN	Nuclear pore complex protein Nup85 OS=Homo sapiens GN=NUP85 PE=1 SV=1	75.0	5.3	15.7 (M:15.7)
345	CEP78_HUMAN	Centrosomal protein of 78 kDa OS=Homo sapiens GN=CEP78 PE=1 SV=1	76.3	9.4	15.6 (M:15.6)
346	TM41A_HUMAN	Transmembrane protein 41A OS=Homo sapiens GN=TMEM41A PE=1 SV=1	29.6	10.1	15.6 (M:15.6)
347	SYNRG_HUMAN	Synergin gamma OS=Homo sapiens GN=SYNRG PE=1 SV=2	140.6	4.8	15.6 (M:15.6)
348	TF3C1_HUMAN	General transcription factor 3C polypeptide 1 OS=Homo sapiens GN=GTF3C1 PE=1 SV=4	238.7	7.1	15.5 (M:15.5)
349	MAK_HUMAN	Serine/threonine-protein kinase MAK OS=Homo sapiens GN=MAK PE=1 SV=2	70.5	10.1	15.5 (M:15.5)
350	ASCC2_HUMAN	Activating signal cointegrator 1 complex subunit 2 OS=Homo sapiens GN=ASCC2 PE=1 SV=3	86.3	4.9	15.5 (M:15.5)
351	DMXL1_HUMAN	DmX-like protein 1 OS=Homo sapiens GN=DMXL1 PE=1 SV=3	337.6	5.9	15.3 (M:15.3)
352	CYTB_HUMAN	Cystatin-B OS=Homo sapiens GN=CSTB PE=1 SV=2	11.1	7.9	15.3 (M:15.3)
353	SRP54_HUMAN	Signal recognition particle 54 kDa protein OS=Homo sapiens GN=SRP54 PE=1 SV=1	55.7	9.5	15.3 (M:15.3)
354	EF1G_HUMAN	Elongation factor 1-gamma OS=Homo sapiens GN=EEF1G PE=1 SV=3	50.1	6.3	15.3 (M:15.3)
355	ZN75C_HUMAN	Putative zinc finger protein 75C OS=Homo sapiens GN=ZNF75CP PE=5 SV=2	49.7	9.9	15.3 (M:15.3)
356	CEBPZ_HUMAN	CCAAT/enhancer-binding protein zeta OS=Homo sapiens GN=CEBPZ PE=1 SV=3	120.9	5.6	15.3 (M:15.3)
357	ADT2_HUMAN	ADP/ATP translocase 2 OS=Homo sapiens GN=SLC25A5 PE=1 SV=7	32.8	10.2	15.3 (M:15.3)
358	S15A4_HUMAN	Solute carrier family 15 member 4 OS=Homo sapiens GN=SLC15A4 PE=1 SV=1	62.0	10.1	15.3 (M:15.3)
359	TSH2_HUMAN	Teashirt homolog 2 OS=Homo sapiens GN=TSHZ2 PE=1 SV=3	114.9	8.9	15.2 (M:15.2)
360	TFG_HUMAN	Protein TFG OS=Homo sapiens GN=TFG PE=1 SV=2	43.4	4.8	15.2 (M:15.2)
361	RTCB_HUMAN	tRNA-splicing ligase RtcB homolog OS=Homo sapiens GN=RTCB PE=1 SV=1	55.2	6.9	15.2 (M:15.2)
362	CXA10_HUMAN	Gap junction alpha-10 protein OS=Homo sapiens GN=GJA10 PE=2 SV=1	61.8	9.0	15.2 (M:15.2)
363	DGLA_HUMAN	Sn1-specific diacylglycerol lipase alpha OS=Homo sapiens GN=DAGLA PE=1 SV=3	114.9	5.9	15.2 (M:15.2)
364	RC3H1_HUMAN	Roquin-1 OS=Homo sapiens GN=RC3H1 PE=1 SV=1	125.7	6.9	15.2 (M:15.2)
365	ZFYV9_HUMAN	Zinc finger FYVE domain-containing protein 9 OS=Homo sapiens GN=ZFYVE9 PE=1 SV=2	156.3	4.7	15.1 (M:15.1)
366	CO6A3_HUMAN	Collagen alpha-3(VI) chain OS=Homo sapiens GN=COL6A3 PE=1 SV=5	343.5	6.3	15.1 (M:15.1)
367	CIPC_HUMAN	CLOCK-interacting pacemaker OS=Homo sapiens GN=CIPC PE=1 SV=2	42.7	9.9	15.1 (M:15.1)
368	ELF2_HUMAN	ETS-related transcription factor Elf-2 OS=Homo sapiens GN=ELF2 PE=1 SV=2	63.9	6.1	15.1 (M:15.1)
369	TCPH_HUMAN	T-complex protein 1 subunit eta OS=Homo sapiens GN=CCT7 PE=1 SV=2	59.3	8.6	15.1 (M:15.1)
370	CNDD3_HUMAN	Condensin-2 complex subunit D3 OS=Homo sapiens GN=NCAPD3 PE=1 SV=2	168.8	8.0	15.0 (M:15.0)
371	GALK1_HUMAN	Galactokinase OS=Homo sapiens GN=GALK1 PE=1 SV=1	42.2	6.0	15.0 (M:15.0)
