# Supplementary material for: Quantitative proteome analysis of Merkel cell carcinoma cell lines using SILAC
Source: Clin Proteomics. 2019 Dec 19;16:42. doi: 10.1186/s12014-019-9263-z (PMC6921584; doi:10.1186/s12014-019-9263-z)
Supplement: Supplementary file 3 — Additional file 3. Table S2. Lists all proteins that are shown in the Venn diagram (Fig. 3). First each cell line was compared to the reference cell line HaCaT. Then the cell line specific proteins of each cell line (MCC13, MKL-1, MKL-2, PeTa and WaGa) were related in a Venn diagram to show similarities and differences. [file 12014_2019_9263_MOESM3_ESM.xls]

## Sheet: Venn diagram
Table S2 lists all proteins that are shown in the Venn diagram (Fig. 3). First each cell line was compared to the reference cell line HaCaT. Then the cell line specific proteins of each cell line (MCC13, MKL-1, MKL-2, PeTa and WaGa) were related in a Venn diagram to show similarities and differences.
UniProt	Protein	MCC13	MKL-1	MKL-2	PeTa	WaGa	Frequency of specific protein
A1L020	MEX3A	0	0	0	0	1	1
A6NHR9	SMCHD1	0	0	0	0	1	1
A8MTZ7	C12orf71	0	0	0	0	1	1
O00483	NDUFA4	0	0	0	0	1	1
O14682	ENC1	0	0	0	0	1	1
O14787	TNPO2	0	0	0	0	1	1
O15320	MIA2	0	0	0	0	1	1
O15375	SLC16A5	0	0	0	0	1	1
O43184	ADAM12	0	0	0	0	1	1
O43194	GPR39	0	0	0	0	1	1
O43526	KCNQ2	0	0	0	0	1	1
O43847	NRDC	0	0	0	0	1	1
O60268	KIAA0513	0	0	0	0	1	1
O60336	MAPKBP1	0	0	0	0	1	1
O60437	PPL	0	0	0	0	1	1
O60486	PLXNC1	0	0	0	0	1	1
O75185	ATP2C2	0	0	0	0	1	1
O75330	HMMR	0	0	0	0	1	1
O75438	NDUFB1	0	0	0	0	1	1
O94906	PRPF6	0	0	0	0	1	1
O94921	CDK14	0	0	0	0	1	1
O94964	SOGA1	0	0	0	0	1	1
O94986	CEP152	0	0	0	0	1	1
O95777	LSM8	0	0	0	0	1	1
O95863	SNAI1	0	0	0	0	1	1
O96013	PAK4	0	0	0	0	1	1
P01133	EGF	0	0	0	0	1	1
P02743	APCS	0	0	0	0	1	1
P02748	C9	0	0	0	0	1	1
P07108	DBI	0	0	0	0	1	1
P09493	TPM1	0	0	0	0	1	1
P0CK97	SLC35E2	0	0	0	0	1	1
P0DMV8	HSPA1A, HSPA1B	0	0	0	0	1	1
P10074	ZBTB48	0	0	0	0	1	1
P10606	COX5B	0	0	0	0	1	1
P11277	SPTB	0	0	0	0	1	1
P12270	TPR	0	0	0	0	1	1
P12883	MYH7	0	0	0	0	1	1
P13611	VCAN	0	0	0	0	1	1
P14854	COX6B1	0	0	0	0	1	1
P14927	UQCRB	0	0	0	0	1	1
P15918	RAG1	0	0	0	0	1	1
P18074	ERCC2	0	0	0	0	1	1
P18440	NAT1	0	0	0	0	1	1
P20809	IL11	0	0	0	0	1	1
P20933	AGA	0	0	0	0	1	1
P22612	PRKACG	0	0	0	0	1	1
P23759	PAX7	0	0	0	0	1	1
P28289	TMOD1	0	0	0	0	1	1
P28482	MAPK1	0	0	0	0	1	1
P31937	HIBADH	0	0	0	0	1	1
P35125	USP6	0	0	0	0	1	1
P41226	UBA7	0	0	0	0	1	1
P41235	HNF4A	0	0	0	0	1	1
P42263	GRIA3	0	0	0	0	1	1
P47985	UQCRFS1	0	0	0	0	1	1
P48539	PCP4	0	0	0	0	1	1
P49450	CENPA	0	0	0	0	1	1
P49750	YLPM1	0	0	0	0	1	1
P49792	RANBP2	0	0	0	0	1	1
P51553	IDH3G	0	0	0	0	1	1
P52306	RAP1GDS1	0	0	0	0	1	1
P52333	JAK3	0	0	0	0	1	1
P52888	THOP1	0	0	0	0	1	1
P54577	YARS	0	0	0	0	1	1
P58876	HIST1H2BD	0	0	0	0	1	1
P67812	SEC11A	0	0	0	0	1	1
Q00325	SLC25A3	0	0	0	0	1	1
Q01101	INSM1	0	0	0	0	1	1
Q01844	EWSR1	0	0	0	0	1	1
Q03518	TAP1	0	0	0	0	1	1
Q07021	C1QBP	0	0	0	0	1	1
Q08828	ADCY1	0	0	0	0	1	1
Q13045	FLII	0	0	0	0	1	1
Q13285	NR5A1	0	0	0	0	1	1
Q13495	MAMLD1	0	0	0	0	1	1
Q13753	LAMC2	0	0	0	0	1	1
Q14562	DHX8	0	0	0	0	1	1
Q149M9	NWD1	0	0	0	0	1	1
Q15049	MLC1	0	0	0	0	1	1
Q15102	PAFAH1B3	0	0	0	0	1	1
Q15651	HMGN3	0	0	0	0	1	1
Q15843	NEDD8	0	0	0	0	1	1
Q16204	CCDC6	0	0	0	0	1	1
Q2M3W8	ZNF181	0	0	0	0	1	1
Q2TAC6	KIF19	0	0	0	0	1	1
Q49A88	CCDC14	0	0	0	0	1	1
Q49AM1	MTERF2	0	0	0	0	1	1
Q4L180	FILIP1L	0	0	0	0	1	1
Q4L235	AASDH	0	0	0	0	1	1
Q569K6	CCDC157	0	0	0	0	1	1
Q5HYA8	TMEM67	0	0	0	0	1	1
Q5M9N0	CCDC158	0	0	0	0	1	1
Q5RHP9	ERICH3	0	0	0	0	1	1
Q5T5P2	KIAA1217	0	0	0	0	1	1
Q5VYV7	SLX4IP	0	0	0	0	1	1
Q5VZF2	MBNL2	0	0	0	0	1	1
Q6EMK4	VASN	0	0	0	0	1	1
Q6GMV2	SMYD5	0	0	0	0	1	1
Q6IQ55	TTBK2	0	0	0	0	1	1
Q6L9W6	B4GALNT3	0	0	0	0	1	1
Q6P0Q8	MAST2	0	0	0	0	1	1
Q6P3R8	NEK5	0	0	0	0	1	1
Q6PEW1	ZCCHC12	0	0	0	0	1	1
Q6PIW4	FIGNL1	0	0	0	0	1	1
Q6ZUA9	MROH5	0	0	0	0	1	1
Q6ZWE6	PLEKHM3	0	0	0	0	1	1
Q7Z614	SNX20	0	0	0	0	1	1
Q86U28	ISCA2	0	0	0	0	1	1
Q86U90	YRDC	0	0	0	0	1	1
Q86UP3	ZFHX4	0	0	0	0	1	1
Q86WR0	CCDC25	0	0	0	0	1	1
Q86Z20	CCDC125	0	0	0	0	1	1
Q8IU54	IFNL1	0	0	0	0	1	1
Q8IV45	UNC5CL	0	0	0	0	1	1
Q8IYX8	CEP57L1	0	0	0	0	1	1
Q8IZF6	ADGRG4	0	0	0	0	1	1
Q8N4H5	TOMM5	0	0	0	0	1	1
Q8N6N3	C1orf52	0	0	0	0	1	1
Q8ND56	LSM14A	0	0	0	0	1	1
Q8NDZ0	BEND2	0	0	0	0	1	1
Q8NHA4	OR2AE1	0	0	0	0	1	1
Q8TD84	DSCAML1	0	0	0	0	1	1
Q8TE58	ADAMTS15	0	0	0	0	1	1
Q8TEB1	DCAF11	0	0	0	0	1	1
Q8TF61	FBXO41	0	0	0	0	1	1
Q8WV93	AFG1L	0	0	0	0	1	1
Q8WVH0	CPLX3	0	0	0	0	1	1
Q92504	SLC39A7	0	0	0	0	1	1
Q92772	CDKL2	0	0	0	0	1	1
Q93008	USP9X	0	0	0	0	1	1
Q93077	HIST1H2AC	0	0	0	0	1	1
Q96CN5	LRRC45	0	0	0	0	1	1
Q96KQ7	EHMT2	0	0	0	0	1	1
Q96L91	EP400	0	0	0	0	1	1
Q96L96	ALPK3	0	0	0	0	1	1
Q96MV1	TMEM56	0	0	0	0	1	1
Q96NL0	RUNDC3B	0	0	0	0	1	1
Q96PY6	NEK1	0	0	0	0	1	1
Q99549	MPHOSPH8	0	0	0	0	1	1
Q99575	POP1	0	0	0	0	1	1
Q99878	HIST1H2AJ	0	0	0	0	1	1
Q99973	TEP1	0	0	0	0	1	1
Q9BPU6	DPYSL5	0	0	0	0	1	1
Q9BRR8	GPATCH1	0	0	0	0	1	1
Q9BSV6	TSEN34	0	0	0	0	1	1
Q9BZF3	OSBPL6	0	0	0	0	1	1
Q9BZH6	WDR11	0	0	0	0	1	1
Q9H0J9	PARP12	0	0	0	0	1	1
Q9H251	CDH23	0	0	0	0	1	1
Q9H254	SPTBN4	0	0	0	0	1	1
Q9H3Y6	SRMS	0	0	0	0	1	1
Q9H773	DCTPP1	0	0	0	0	1	1
Q9H792	PEAK1	0	0	0	0	1	1
Q9HA90	EFCC1	0	0	0	0	1	1
Q9NR96	TLR9	0	0	0	0	1	1
Q9NS62	THSD1	0	0	0	0	1	1
Q9NWZ5	UCKL1	0	0	0	0	1	1
Q9NYF8	BCLAF1	0	0	0	0	1	1
Q9NYU2	UGGT1	0	0	0	0	1	1
Q9NZB2	FAM120A	0	0	0	0	1	1
Q9NZS2	KLRF1	0	0	0	0	1	1
Q9UBY9	HSPB7	0	0	0	0	1	1
Q9UIF9	BAZ2A	0	0	0	0	1	1
Q9UJS0	SLC25A13	0	0	0	0	1	1
Q9UKT7	FBXL3	0	0	0	0	1	1
Q9UPN6	SCAF8	0	0	0	0	1	1
Q9UQ16	DNM3	0	0	0	0	1	1
Q9Y247	FAM50B	0	0	0	0	1	1
Q9Y2G9	SBNO2	0	0	0	0	1	1
Q9Y2R4	DDX52	0	0	0	0	1	1
Q9Y2Z9	COQ6	0	0	0	0	1	1
Q9Y385	UBE2J1	0	0	0	0	1	1
Q9Y5Y5	PEX16	0	0	0	0	1	1
Q9Y6F9	WNT6	0	0	0	0	1	1
Q9Y6Y1	CAMTA1	0	0	0	0	1	1
A0AUZ9	KANSL1L	0	0	0	1	0	1
O00268	TAF4	0	0	0	1	0	1
O75037	KIF21B	0	0	0	1	0	1
O75051	PLXNA2	0	0	0	1	0	1
O75881	CYP7B1	0	0	0	1	0	1
O75912	DGKI	0	0	0	1	0	1
P04350	TUBB4A	0	0	0	1	0	1
P09874	PARP1	0	0	0	1	0	1
P0C1H6	H2BFM	0	0	0	1	0	1
P15086	CPB1	0	0	0	1	0	1
P25440	BRD2	0	0	0	1	0	1
P27352	GIF	0	0	0	1	0	1
P28476	GABRR2	0	0	0	1	0	1
P49427	CDC34	0	0	0	1	0	1
P51172	SCNN1D	0	0	0	1	0	1
P51784	USP11	0	0	0	1	0	1
P55036	PSMD4	0	0	0	1	0	1
P55265	ADAR	0	0	0	1	0	1
P60412	KRTAP10-11	0	0	0	1	0	1
Q00059	TFAM	0	0	0	1	0	1
Q01664	TFAP4	0	0	0	1	0	1
Q03154	ACY1	0	0	0	1	0	1
Q04721	NOTCH2	0	0	0	1	0	1
Q07352	ZFP36L1	0	0	0	1	0	1
Q14690	PDCD11	0	0	0	1	0	1
Q15349	RPS6KA2	0	0	0	1	0	1
Q15545	TAF7	0	0	0	1	0	1
Q53T59	HS1BP3	0	0	0	1	0	1
Q5JSH3	WDR44	0	0	0	1	0	1
Q6ZMM2	ADAMTSL5	0	0	0	1	0	1
Q70CQ1	USP49	0	0	0	1	0	1
Q70Z53	FRA10AC1	0	0	0	1	0	1
Q76B58	BRINP3	0	0	0	1	0	1
Q7L5Y1	ENOSF1	0	0	0	1	0	1
Q7Z3V4	UBE3B	0	0	0	1	0	1
Q7Z444	ERAS	0	0	0	1	0	1
Q7Z5N4	SDK1	0	0	0	1	0	1
Q7Z6Z7	HUWE1	0	0	0	1	0	1
Q7Z7K6	CENPV	0	0	0	1	0	1
Q86YA3	ZGRF1	0	0	0	1	0	1
Q8IXW0	LMNTD2	0	0	0	1	0	1
Q8N9V3	WDSUB1	0	0	0	1	0	1
Q8NC42	RNF149	0	0	0	1	0	1
Q8NC60	NOA1	0	0	0	1	0	1
Q8NC74	RBBP8NL	0	0	0	1	0	1
Q8NCR0	B3GALNT2	0	0	0	1	0	1
Q8NCT3	KIAA0895	0	0	0	1	0	1
Q8TC44	POC1B	0	0	0	1	0	1
Q8TCY9	URGCP	0	0	0	1	0	1
Q8WV41	SNX33	0	0	0	1	0	1
Q92791	P3H4	0	0	0	1	0	1
Q96J02	ITCH	0	0	0	1	0	1
Q96N66	MBOAT7	0	0	0	1	0	1
Q96Q05	TRAPPC9	0	0	0	1	0	1
Q96S55	WRNIP1	0	0	0	1	0	1
Q96TA1	FAM129B	0	0	0	1	0	1
Q9H0C2	SLC25A31	0	0	0	1	0	1
Q9H361	PABPC3	0	0	0	1	0	1
Q9H9Y2	RPF1	0	0	0	1	0	1
Q9NR64	KLHL1	0	0	0	1	0	1
Q9NSB2	KRT84	0	0	0	1	0	1
Q9NU23	LYRM2	0	0	0	1	0	1
Q9NYY8	FASTKD2	0	0	0	1	0	1
Q9UBG7	RBPJL	0	0	0	1	0	1
Q9UHF0	TAC3	0	0	0	1	0	1
Q9UIQ6	LNPEP	0	0	0	1	0	1
Q9UNA0	ADAMTS5	0	0	0	1	0	1
Q9UNH6	SNX7	0	0	0	1	0	1
Q9UPS8	ANKRD26	0	0	0	1	0	1
Q9UQE7	SMC3	0	0	0	1	0	1
Q9Y676	MRPS18B	0	0	0	1	0	1
Q9Y6J0	CABIN1	0	0	0	1	0	1
O60220	TIMM8A	0	0	0	1	1	2
P18859	ATP5J	0	0	0	1	1	2
Q1MX18	INSC	0	0	0	1	1	2
Q9BXT5	TEX15	0	0	0	1	1	2
Q9HCG8	CWC22	0	0	0	1	1	2
A2RRH5	WDR27	0	0	1	0	0	1
A4UGR9	XIRP2	0	0	1	0	0	1
O14920	IKBKB	0	0	1	0	0	1
O14975	SLC27A2	0	0	1	0	0	1
O15056	SYNJ2	0	0	1	0	0	1
O15195	VILL	0	0	1	0	0	1
O75145	PPFIA3	0	0	1	0	0	1
O75746	SLC25A12	0	0	1	0	0	1
O94966	USP19	0	0	1	0	0	1
P08172	CHRM2	0	0	1	0	0	1
P10243	MYBL1	0	0	1	0	0	1
P11532	DMD	0	0	1	0	0	1
P12830	CDH1	0	0	1	0	0	1
P14314	PRKCSH	0	0	1	0	0	1
P16233	PNLIP	0	0	1	0	0	1
P16591	FER	0	0	1	0	0	1
P16860	NPPB	0	0	1	0	0	1
P30260	CDC27	0	0	1	0	0	1
P30520	ADSS	0	0	1	0	0	1
P35916	FLT4	0	0	1	0	0	1
P46060	RANGAP1	0	0	1	0	0	1
P46821	MAP1B	0	0	1	0	0	1
P49914	MTHFS	0	0	1	0	0	1
P51957	NEK4	0	0	1	0	0	1
P51970	NDUFA8	0	0	1	0	0	1
P68363	TUBA1B	0	0	1	0	0	1
P78347	GTF2I	0	0	1	0	0	1
P82094	TMF1	0	0	1	0	0	1
Q06418	TYRO3	0	0	1	0	0	1
Q08209	PPP3CA	0	0	1	0	0	1
Q0VAA5	PLCXD2	0	0	1	0	0	1
Q12772	SREBF2	0	0	1	0	0	1
Q13561	DCTN2	0	0	1	0	0	1
Q13671	RIN1	0	0	1	0	0	1
Q13946	PDE7A	0	0	1	0	0	1
Q14142	TRIM14	0	0	1	0	0	1
Q14154	KIAA0141	0	0	1	0	0	1
Q14683	SMC1A	0	0	1	0	0	1
Q14697	GANAB	0	0	1	0	0	1
Q15070	OXA1L	0	0	1	0	0	1
Q15293	RCN1	0	0	1	0	0	1
Q16643	DBN1	0	0	1	0	0	1
Q16773	KYAT1	0	0	1	0	0	1
Q2M3C6	TMEM266	0	0	1	0	0	1
Q2NKQ1	SGSM1	0	0	1	0	0	1
Q32P41	TRMT5	0	0	1	0	0	1
Q38SD2	LRRK1	0	0	1	0	0	1
Q4G0J3	LARP7	0	0	1	0	0	1
Q5HY64	FAM47C	0	0	1	0	0	1
Q5T8R8	C9orf66	0	0	1	0	0	1
Q6E0U4	DMKN	0	0	1	0	0	1
Q6IS24	WBSCR17	0	0	1	0	0	1
Q6NY19	KANK3	0	0	1	0	0	1
Q6PJP8	DCLRE1A	0	0	1	0	0	1
Q6PK81	ZNF773	0	0	1	0	0	1
Q6TGC4	PADI6	0	0	1	0	0	1
Q76KP1	B4GALNT4	0	0	1	0	0	1
Q7L7L0	HIST3H2A	0	0	1	0	0	1
Q7Z628	NET1	0	0	1	0	0	1
Q86VH5	LRRTM3	0	0	1	0	0	1
Q8IU68	TMC8	0	0	1	0	0	1
Q8IVF5	TIAM2	0	0	1	0	0	1
Q8IY81	FTSJ3	0	0	1	0	0	1
Q8IYT8	ULK2	0	0	1	0	0	1
Q8IZT6	ASPM	0	0	1	0	0	1
Q8J025	APCDD1	0	0	1	0	0	1
Q8NBP7	PCSK9	0	0	1	0	0	1
Q8NBS9	TXNDC5	0	0	1	0	0	1
Q8ND07	BBOF1	0	0	1	0	0	1
Q8NFR9	IL17RE	0	0	1	0	0	1
Q8TDX9	PKD1L1	0	0	1	0	0	1
Q8TER5	ARHGEF40	0	0	1	0	0	1
Q8WUZ0	BCL7C	0	0	1	0	0	1
Q8WXE0	CASKIN2	0	0	1	0	0	1
Q8WXI3	ASB10	0	0	1	0	0	1
Q92522	H1FX	0	0	1	0	0	1
Q92673	SORL1	0	0	1	0	0	1
Q92917	GPKOW	0	0	1	0	0	1
Q969T3	SNX21	0	0	1	0	0	1
Q96A00	PPP1R14A	0	0	1	0	0	1
Q96DZ5	CLIP3	0	0	1	0	0	1
Q96T68	SETDB2	0	0	1	0	0	1
Q99698	LYST	0	0	1	0	0	1
Q9BPW5	RASL11B	0	0	1	0	0	1
Q9BRF8	CPPED1	0	0	1	0	0	1
Q9BVA1	TUBB2B	0	0	1	0	0	1
Q9BWL3	C1orf43	0	0	1	0	0	1
Q9BZR6	RTN4R	0	0	1	0	0	1
Q9H293	IL25	0	0	1	0	0	1
Q9HBE5	IL21R	0	0	1	0	0	1
Q9HCR9	PDE11A	0	0	1	0	0	1
Q9NR82	KCNQ5	0	0	1	0	0	1
Q9P2K2	TXNDC16	0	0	1	0	0	1
Q9UHD8	SEPT9	0	0	1	0	0	1
Q9UKU0	ACSL6	0	0	1	0	0	1
Q9ULD4	BRPF3	0	0	1	0	0	1
Q9UM73	ALK	0	0	1	0	0	1
Q9UPX0	IGSF9B	0	0	1	0	0	1
Q9UQB8	BAIAP2	0	0	1	0	0	1
Q9Y266	NUDC	0	0	1	0	0	1
Q9Y4F9	RIPOR2	0	0	1	0	0	1
O60312	ATP10A	0	0	1	0	1	2
O75106	AOC2	0	0	1	0	1	2
O75586	MED6	0	0	1	0	1	2
P01024	C3	0	0	1	0	1	2
P02649	APOE	0	0	1	0	1	2
P04181	OAT	0	0	1	0	1	2
P09429	HMGB1	0	0	1	0	1	2
P0C091	FREM3	0	0	1	0	1	2
P24298	GPT	0	0	1	0	1	2
P27815	PDE4A	0	0	1	0	1	2
P36955	SERPINF1	0	0	1	0	1	2
P51812	RPS6KA3	0	0	1	0	1	2
Q17RY0	CPEB4	0	0	1	0	1	2
Q1KMD3	HNRNPUL2	0	0	1	0	1	2
Q5VU69	C1orf189	0	0	1	0	1	2
Q8IVE3	PLEKHH2	0	0	1	0	1	2
Q8N6G5	CSGALNACT2	0	0	1	0	1	2
Q96KR7	PHACTR3	0	0	1	0	1	2
Q9H607	OCEL1	0	0	1	0	1	2
Q9P2F8	SIPA1L2	0	0	1	0	1	2
Q9UNX3	RPL26L1	0	0	1	0	1	2
A1A519	FAM170A	0	0	1	1	0	2
O00308	WWP2	0	0	1	1	0	2
O00567	NOP56	0	0	1	1	0	2
O00755	WNT7A	0	0	1	1	0	2
O43379	WDR62	0	0	1	1	0	2
P13929	ENO3	0	0	1	1	0	2
P33527	ABCC1	0	0	1	1	0	2
Q16778	HIST2H2BE	0	0	1	1	0	2
Q8IW36	ZNF695	0	0	1	1	0	2
Q8IWA5	SLC44A2	0	0	1	1	0	2
Q93034	CUL5	0	0	1	1	0	2
Q96MP8	KCTD7	0	0	1	1	0	2
Q9C010	PKIB	0	0	1	1	0	2
Q9GZT3	SLIRP	0	0	1	1	0	2
Q9H269	VPS16	0	0	1	1	0	2
Q9NPA8	ENY2	0	0	1	1	0	2
Q9UM63	PLAGL1	0	0	1	1	0	2
I3L3R5	CCER2	0	0	1	1	1	3
O75132	ZBED4	0	0	1	1	1	3
O94832	MYO1D	0	0	1	1	1	3
P09936	UCHL1	0	0	1	1	1	3
P33316	DUT	0	0	1	1	1	3
P61599	NAA20	0	0	1	1	1	3
P62316	SNRPD2	0	0	1	1	1	3
Q9H3N1	TMX1	0	0	1	1	1	3
A0A096LP49	CCDC187	0	1	0	0	0	1
A3KMH1	VWA8	0	1	0	0	0	1
A6NFY4	NEMP2	0	1	0	0	0	1
A6NKB5	PCNX2	0	1	0	0	0	1
A7MD48	SRRM4	0	1	0	0	0	1
A8MTQ0	NOTO	0	1	0	0	0	1
O00217	NDUFS8	0	1	0	0	0	1
O14523	C2CD2L	0	1	0	0	0	1
O15020	SPTBN2	0	1	0	0	0	1
O60237	PPP1R12B	0	1	0	0	0	1
O60292	SIPA1L3	0	1	0	0	0	1
O60309	LRRC37A3	0	1	0	0	0	1
O60658	PDE8A	0	1	0	0	0	1
O60762	DPM1	0	1	0	0	0	1
O60894	RAMP1	0	1	0	0	0	1
O75366	AVIL	0	1	0	0	0	1
O75489	NDUFS3	0	1	0	0	0	1
O75643	SNRNP200	0	1	0	0	0	1
O94779	CNTN5	0	1	0	0	0	1
O95073	RAD54B, FSBP	0	1	0	0	0	1
P00740	F9	0	1	0	0	0	1
P00918	CA2	0	1	0	0	0	1
P02790	HPX	0	1	0	0	0	1
P05556	ITGB1	0	1	0	0	0	1
P06576	ATP5B	0	1	0	0	0	1
P07196	NEFL	0	1	0	0	0	1
P07197	NEFM	0	1	0	0	0	1
P08034	GJB1	0	1	0	0	0	1
P09669	COX6C	0	1	0	0	0	1
P0CG47	UBB	0	1	0	0	0	1
P11137	MAP2	0	1	0	0	0	1
P12236	SLC25A6	0	1	0	0	0	1
P15954	COX7C	0	1	0	0	0	1
P18405	SRD5A1	0	1	0	0	0	1
P22004	BMP6	0	1	0	0	0	1
P22105	TNXB	0	1	0	0	0	1
P24043	LAMA2	0	1	0	0	0	1
P24903	CYP2F1	0	1	0	0	0	1
P28562	DUSP1	0	1	0	0	0	1
P28799	GRN	0	1	0	0	0	1
P28827	PTPRM	0	1	0	0	0	1
P30405	PPIF	0	1	0	0	0	1
P35232	PHB	0	1	0	0	0	1
P35251	RFC1	0	1	0	0	0	1
P35900	KRT20	0	1	0	0	0	1
P42081	CD86	0	1	0	0	0	1
P46783	RPS10	0	1	0	0	0	1
P48728	AMT	0	1	0	0	0	1
P49321	NASP	0	1	0	0	0	1
P54198	HIRA	0	1	0	0	0	1
P55145	MANF	0	1	0	0	0	1
P55809	OXCT1	0	1	0	0	0	1
P78318	IGBP1	0	1	0	0	0	1
P78560	CRADD	0	1	0	0	0	1
P80303	NUCB2	0	1	0	0	0	1
P98095	FBLN2	0	1	0	0	0	1
Q01082	SPTBN1	0	1	0	0	0	1
Q04756	HGFAC	0	1	0	0	0	1
Q05682	CALD1	0	1	0	0	0	1
Q08211	DHX9	0	1	0	0	0	1
Q12802	AKAP13	0	1	0	0	0	1
Q13148	TARDBP	0	1	0	0	0	1
Q13428	TCOF1	0	1	0	0	0	1
Q13573	SNW1	0	1	0	0	0	1
Q13591	SEMA5A	0	1	0	0	0	1
Q13838	DDX39B	0	1	0	0	0	1
Q14289	PTK2B	0	1	0	0	0	1
Q14676	MDC1	0	1	0	0	0	1
Q14790	CASP8	0	1	0	0	0	1
Q15014	MORF4L2	0	1	0	0	0	1
Q15276	RABEP1	0	1	0	0	0	1
Q15459	SF3A1	0	1	0	0	0	1
Q16236	NFE2L2	0	1	0	0	0	1
Q16836	HADH	0	1	0	0	0	1
Q2M389	WASHC4	0	1	0	0	0	1
Q494U1	PLEKHN1	0	1	0	0	0	1
Q5SWH9	TMEM69	0	1	0	0	0	1
Q5T0F9	CC2D1B	0	1	0	0	0	1
Q5VU43	PDE4DIP, LOC653513	0	1	0	0	0	1
Q5VXT5	SYPL2	0	1	0	0	0	1
Q66GS9	CEP135	0	1	0	0	0	1
Q66K14	TBC1D9B	0	1	0	0	0	1
Q685J3	MUC17	0	1	0	0	0	1
Q6IQ23	PLEKHA7	0	1	0	0	0	1
Q6P1X5	TAF2	0	1	0	0	0	1
Q6P2Q9	PRPF8	0	1	0	0	0	1
Q6P4F7	ARHGAP11A	0	1	0	0	0	1
Q6P9H5	GIMAP6	0	1	0	0	0	1
Q6ZN28	MACC1	0	1	0	0	0	1
Q6ZQW0	IDO2	0	1	0	0	0	1
Q6ZRI0	OTOG	0	1	0	0	0	1
Q6ZT07	TBC1D9	0	1	0	0	0	1
Q6ZVH7	ESPNL	0	1	0	0	0	1
Q70Z35	PREX2	0	1	0	0	0	1
Q86UK5	EVC2	0	1	0	0	0	1
Q86V15	CASZ1	0	1	0	0	0	1
Q8IUB2	WFDC3	0	1	0	0	0	1
Q8IX12	CCAR1	0	1	0	0	0	1
Q8IX21	SLF2	0	1	0	0	0	1
Q8IXJ9	ASXL1	0	1	0	0	0	1
Q8N0U8	VKORC1L1	0	1	0	0	0	1
Q8N6T3	ARFGAP1	0	1	0	0	0	1
Q8N8V4	ANKS4B	0	1	0	0	0	1
Q8N9N2	ASCC1	0	1	0	0	0	1
Q8N9W8	FAM71D	0	1	0	0	0	1
Q8NG92	OR13H1	0	1	0	0	0	1
Q8TAF3	WDR48	0	1	0	0	0	1
Q8TBM8	DNAJB14	0	1	0	0	0	1
Q8TCG1	KIAA1524	0	1	0	0	0	1
Q8WTW3	COG1	0	1	0	0	0	1
Q8WWR8	NEU4	0	1	0	0	0	1
Q8WXF0	SRSF12	0	1	0	0	0	1
Q92485	SMPDL3B	0	1	0	0	0	1
Q92543	SNX19	0	1	0	0	0	1
Q92835	INPP5D	0	1	0	0	0	1
Q93070	ART4	0	1	0	0	0	1
Q96AG4	LRRC59	0	1	0	0	0	1
Q96CB9	NSUN4	0	1	0	0	0	1
Q96EP5	DAZAP1	0	1	0	0	0	1
Q96J84	KIRREL	0	1	0	0	0	1
Q96K76	USP47	0	1	0	0	0	1
Q96MR6	CFAP57	0	1	0	0	0	1
Q96PU4	UHRF2	0	1	0	0	0	1
Q96QI5	HS3ST6	0	1	0	0	0	1
Q99719	SEPT5	0	1	0	0	0	1
Q99848	EBNA1BP2	0	1	0	0	0	1
Q9BQJ4	TMEM47	0	1	0	0	0	1
Q9BU76	C1orf35	0	1	0	0	0	1
Q9BXP5	SRRT	0	1	0	0	0	1
Q9BY07	SLC4A5	0	1	0	0	0	1
Q9BYB0	SHANK3	0	1	0	0	0	1
Q9H0B3	KIAA1683	0	1	0	0	0	1
Q9H0C8	ILKAP	0	1	0	0	0	1
Q9H1K4	SLC25A18	0	1	0	0	0	1
Q9H2T7	RANBP17	0	1	0	0	0	1
Q9H8Y1	VRTN	0	1	0	0	0	1
Q9HCD6	TANC2	0	1	0	0	0	1
Q9NQS1	AVEN	0	1	0	0	0	1
Q9NR99	MXRA5	0	1	0	0	0	1
Q9NRC6	SPTBN5	0	1	0	0	0	1
Q9NRE1	MMP26	0	1	0	0	0	1
Q9NRK6	ABCB10	0	1	0	0	0	1
Q9NTN3	SLC35D1	0	1	0	0	0	1
Q9NWB1	RBFOX1	0	1	0	0	0	1
Q9UHI6	DDX20	0	1	0	0	0	1
Q9UMF0	ICAM5	0	1	0	0	0	1
Q9UPP1	PHF8	0	1	0	0	0	1
Q9UQ26	RIMS2	0	1	0	0	0	1
Q9Y259	CHKB	0	1	0	0	0	1
Q9Y278	HS3ST2	0	1	0	0	0	1
Q9Y2K9	STXBP5L	0	1	0	0	0	1
Q9Y2W1	THRAP3	0	1	0	0	0	1
Q9Y2W2	WBP11	0	1	0	0	0	1
Q9Y4A5	TRRAP	0	1	0	0	0	1
Q9Y4B5	MTCL1	0	1	0	0	0	1
Q9Y5B6	PAXBP1	0	1	0	0	0	1
Q9Y5L4	TIMM13	0	1	0	0	0	1
Q9Y5Q5	CORIN	0	1	0	0	0	1
Q9Y6E0	STK24	0	1	0	0	0	1
Q9Y6E2	BZW2	0	1	0	0	0	1
Q9Y6Q2	STON1, STON1-GTF2A1L	0	1	0	0	0	1
A0A087WXM9	MEIKIN	0	1	0	0	1	2
A6NDG6	PGP	0	1	0	0	1	2
A6NL88	SHISA7	0	1	0	0	1	2
A8MXT2	MAGEB17	0	1	0	0	1	2
O43896	KIF1C	0	1	0	0	1	2
O60346	PHLPP1	0	1	0	0	1	2
O75096	LRP4	0	1	0	0	1	2
O75947	ATP5H	0	1	0	0	1	2
P01266	TG	0	1	0	0	1	2
P02751	FN1	0	1	0	0	1	2
P0CW27	CCDC166	0	1	0	0	1	2
P11586	MTHFD1	0	1	0	0	1	2
P16422	EPCAM	0	1	0	0	1	2
P22061	PCMT1	0	1	0	0	1	2
P23526	AHCY	0	1	0	0	1	2
P45973	CBX5	0	1	0	0	1	2
P52758	RIDA	0	1	0	0	1	2
P61224	RAP1B	0	1	0	0	1	2
P68371	TUBB4B	0	1	0	0	1	2
Q02952	AKAP12	0	1	0	0	1	2
Q14011	CIRBP	0	1	0	0	1	2
Q15424	SAFB	0	1	0	0	1	2
Q6KCM7	SLC25A25	0	1	0	0	1	2
Q6ZRI8	ARHGAP36	0	1	0	0	1	2
Q76L83	ASXL2	0	1	0	0	1	2
Q86SX6	GLRX5	0	1	0	0	1	2
Q8TD16	BICD2	0	1	0	0	1	2
Q8WWI1	LMO7	0	1	0	0	1	2
Q92817	EVPL	0	1	0	0	1	2
Q96AC6	KIFC2	0	1	0	0	1	2
Q9BUJ2	HNRNPUL1	0	1	0	0	1	2
Q9C005	DPY30	0	1	0	0	1	2
Q9H0W5	CCDC8	0	1	0	0	1	2
Q9H2G4	TSPYL2	0	1	0	0	1	2
Q9H910	JPT2	0	1	0	0	1	2
Q9HCE1	MOV10	0	1	0	0	1	2
Q9HCM3	KIAA1549	0	1	0	0	1	2
Q9NW68	BSDC1	0	1	0	0	1	2
Q9P2A4	ABI3	0	1	0	0	1	2
Q9UBT2	UBA2	0	1	0	0	1	2
Q9UIW2	PLXNA1	0	1	0	0	1	2
Q9UKV3	ACIN1	0	1	0	0	1	2
Q9UKW4	VAV3	0	1	0	0	1	2
Q9Y2V2	CARHSP1	0	1	0	0	1	2
Q9Y5R6	DMRT1	0	1	0	0	1	2
O75533	SF3B1	0	1	0	1	0	2
O95613	PCNT	0	1	0	1	0	2
P03928	ATP8	0	1	0	1	0	2
P26583	HMGB2	0	1	0	1	0	2
Q14980	NUMA1	0	1	0	1	0	2
Q8N5C6	SRBD1	0	1	0	1	0	2
Q8N690	DEFB119	0	1	0	1	0	2
Q96RY7	IFT140	0	1	0	1	0	2
Q99877	HIST1H2BN	0	1	0	1	0	2
Q9ULH0	KIDINS220	0	1	0	1	0	2
P20674	COX5A	0	1	0	1	1	3
P54274	TERF1	0	1	0	1	1	3
Q7L273	KCTD9	0	1	0	1	1	3
Q99570	PIK3R4	0	1	0	1	1	3
O75251	NDUFS7	0	1	1	0	0	2
P00505	GOT2	0	1	1	0	0	2
P04217	A1BG	0	1	1	0	0	2
P11310	ACADM	0	1	1	0	0	2
P18065	IGFBP2	0	1	1	0	0	2
P23142	FBLN1	0	1	1	0	0	2
Q13162	PRDX4	0	1	1	0	0	2
Q14C86	GAPVD1	0	1	1	0	0	2
Q15569	TESK1	0	1	1	0	0	2
Q7Z5M5	TMC3	0	1	1	0	0	2
Q92625	ANKS1A	0	1	1	0	0	2
Q96IC2	LOC81691	0	1	1	0	0	2
Q99426	TBCB	0	1	1	0	0	2
Q9BX68	HINT2	0	1	1	0	0	2
O75164	KDM4A	0	1	1	0	1	3
O95445	APOM	0	1	1	0	1	3
P07437	TUBB	0	1	1	0	1	3
P0C0L5	C4B, C4B_2	0	1	1	0	1	3
P30040	ERP29	0	1	1	0	1	3
P30048	PRDX3	0	1	1	0	1	3
P37802	TAGLN2	0	1	1	0	1	3
P40692	MLH1	0	1	1	0	1	3
P49747	COMP	0	1	1	0	1	3
Q00056	HOXA4	0	1	1	0	1	3
Q15366	PCBP2	0	1	1	0	1	3
Q71U36	TUBA1A	0	1	1	0	1	3
Q9H0R4	HDHD2	0	1	1	0	1	3
Q9HBR0	SLC38A10	0	1	1	0	1	3
Q9UKM9	RALY	0	1	1	0	1	3
Q9Y2H9	MAST1	0	1	1	0	1	3
Q12913	PTPRJ	0	1	1	1	0	3
Q13257	MAD2L1	0	1	1	1	0	3
Q6ZMK1	CYHR1	0	1	1	1	0	3
Q9NZB8	MOCS1	0	1	1	1	0	3
Q9Y4W6	AFG3L2	0	1	1	1	0	3
O14594	NCAN	0	1	1	1	1	4
P02656	APOC3	0	1	1	1	1	4
P02787	TF	0	1	1	1	1	4
P10645	CHGA	0	1	1	1	1	4
P14866	HNRNPL	0	1	1	1	1	4
P16949	STMN1	0	1	1	1	1	4
P30273	FCER1G	0	1	1	1	1	4
P82979	SARNP	0	1	1	1	1	4
P98179	RBM3	0	1	1	1	1	4
Q6EEV6	SUMO4	0	1	1	1	1	4
Q7Z4W1	DCXR	0	1	1	1	1	4
Q7Z7F0	KIAA0907	0	1	1	1	1	4
Q8NFH8	REPS2	0	1	1	1	1	4
Q8TB92	HMGCLL1	0	1	1	1	1	4
Q96PK6	RBM14, RBM14-RBM4	0	1	1	1	1	4
B5MCY1	TDRD15	1	0	0	0	0	1
O14983	ATP2A1	1	0	0	0	0	1
O15212	PFDN6	1	0	0	0	0	1
O43497	CACNA1G	1	0	0	0	0	1
O60814	HIST1H2BK	1	0	0	0	0	1
O95405	ZFYVE9	1	0	0	0	0	1
P00338	LDHA	1	0	0	0	0	1
P04040	CAT	1	0	0	0	0	1
P04080	CSTB	1	0	0	0	0	1
P04732	MT1E	1	0	0	0	0	1
P05164	MPO	1	0	0	0	0	1
P06744	GPI	1	0	0	0	0	1
P07195	LDHB	1	0	0	0	0	1
P08195	SLC3A2	1	0	0	0	0	1
P08238	HSP90AB1	1	0	0	0	0	1
P08779	KRT16	1	0	0	0	0	1
P09382	LGALS1	1	0	0	0	0	1
P09497	CLTB	1	0	0	0	0	1
P0C869	JMJD7-PLA2G4B, PLA2G4B	1	0	0	0	0	1
P11274	BCR	1	0	0	0	0	1
P12111	COL6A3	1	0	0	0	0	1
P13637	ATP1A3	1	0	0	0	0	1
P15880	RPS2	1	0	0	0	0	1
P18077	RPL35A	1	0	0	0	0	1
P26641	EEF1G	1	0	0	0	0	1
P27635	RPL10	1	0	0	0	0	1
P36578	RPL4	1	0	0	0	0	1
P39687	ANP32A	1	0	0	0	0	1
P40429	RPL13A	1	0	0	0	0	1
P42677	RPS27	1	0	0	0	0	1
P42695	NCAPD3	1	0	0	0	0	1
P46776	RPL27A	1	0	0	0	0	1
P46778	RPL21	1	0	0	0	0	1
P49207	RPL34	1	0	0	0	0	1
P49368	CCT3	1	0	0	0	0	1
P49458	SRP9	1	0	0	0	0	1
P49773	HINT1	1	0	0	0	0	1
P52907	CAPZA1	1	0	0	0	0	1
P52926	HMGA2	1	0	0	0	0	1
P60660	MYL6	1	0	0	0	0	1
P61011	SRP54	1	0	0	0	0	1
P61313	RPL15	1	0	0	0	0	1
P62241	RPS8	1	0	0	0	0	1
P62269	RPS18	1	0	0	0	0	1
P62280	RPS11	1	0	0	0	0	1
P82914	MRPS15	1	0	0	0	0	1
P83881	RPL36A	1	0	0	0	0	1
P84090	ERH	1	0	0	0	0	1
Q01954	BNC1	1	0	0	0	0	1
Q02539	HIST1H1A	1	0	0	0	0	1
Q02543	RPL18A	1	0	0	0	0	1
Q03468	ERCC6	1	0	0	0	0	1
Q0P6D6	CCDC15	1	0	0	0	0	1
Q0ZLH3	DFNB59	1	0	0	0	0	1
Q12789	GTF3C1	1	0	0	0	0	1
Q12830	BPTF	1	0	0	0	0	1
Q12912	LRMP	1	0	0	0	0	1
Q13637	RAB32	1	0	0	0	0	1
Q13740	ALCAM	1	0	0	0	0	1
Q14978	NOLC1	1	0	0	0	0	1
Q15084	PDIA6	1	0	0	0	0	1
Q15185	PTGES3	1	0	0	0	0	1
Q15717	ELAVL1	1	0	0	0	0	1
Q3V6T2	CCDC88A	1	0	0	0	0	1
Q49A92	C8orf34	1	0	0	0	0	1
Q504Q3	PAN2	1	0	0	0	0	1
Q5JR98	TCTEX1D4	1	0	0	0	0	1
Q5JS13	RALGPS1	1	0	0	0	0	1
Q5JTW2	CEP78	1	0	0	0	0	1
Q5QNW6	HIST2H2BF	1	0	0	0	0	1
Q5TC82	RC3H1	1	0	0	0	0	1
Q5THK1	PRR14L	1	0	0	0	0	1
Q5UIP0	RIF1	1	0	0	0	0	1
Q6IS14	EIF5AL1	1	0	0	0	0	1
Q6PL18	ATAD2	1	0	0	0	0	1
Q6UWL2	SUSD1	1	0	0	0	0	1
Q6WCQ1	MPRIP	1	0	0	0	0	1
Q86UK0	ABCA12	1	0	0	0	0	1
Q86YV5	PRAG1	1	0	0	0	0	1
Q8N163	CCAR2	1	0	0	0	0	1
Q8N697	SLC15A4	1	0	0	0	0	1
Q8TC92	ENOX1	1	0	0	0	0	1
Q92734	TFG	1	0	0	0	0	1
Q969M2	GJA10	1	0	0	0	0	1
Q96C19	EFHD2	1	0	0	0	0	1
Q96D53	COQ8B	1	0	0	0	0	1
Q96DR7	ARHGEF26	1	0	0	0	0	1
Q96PC3	AP1S3	1	0	0	0	0	1
Q96SE0	ABHD1	1	0	0	0	0	1
Q99497	PARK7	1	0	0	0	0	1
Q99614	TTC1	1	0	0	0	0	1
Q99996	AKAP9	1	0	0	0	0	1
Q9BSG1	ZNF2	1	0	0	0	0	1
Q9BX63	BRIP1	1	0	0	0	0	1
Q9H257	CARD9	1	0	0	0	0	1
Q9H299	SH3BGRL3	1	0	0	0	0	1
Q9H3K6	BOLA2, BOLA2B, LOC107984053	1	0	0	0	0	1
Q9H4L4	SENP3	1	0	0	0	0	1
Q9HBV2	SPACA1	1	0	0	0	0	1
Q9NRL2	BAZ1A	1	0	0	0	0	1
Q9NY26	SLC39A1	1	0	0	0	0	1
Q9NYL9	TMOD3	1	0	0	0	0	1
Q9NZL9	MAT2B	1	0	0	0	0	1
Q9P227	ARHGAP23	1	0	0	0	0	1
Q9UMZ2	SYNRG	1	0	0	0	0	1
Q9Y3I0	RTCB	1	0	0	0	0	1
Q9Y485	DMXL1	1	0	0	0	0	1
Q9Y4H2	IRS2	1	0	0	0	0	1
Q9Y6C2	EMILIN1	1	0	0	0	0	1
Q9Y6H1	CHCHD2	1	0	0	0	0	1
O60506	SYNCRIP	1	0	0	0	1	2
O75347	TBCA	1	0	0	0	1	2
O75531	BANF1	1	0	0	0	1	2
P09211	GSTP1	1	0	0	0	1	2
P14678	SNRPB	1	0	0	0	1	2
P23588	EIF4B	1	0	0	0	1	2
P42766	RPL35	1	0	0	0	1	2
P50914	RPL14	1	0	0	0	1	2
P62987	UBA52	1	0	0	0	1	2
Q00688	FKBP3	1	0	0	0	1	2
Q07666	KHDRBS1	1	0	0	0	1	2
Q9BV73	CEP250	1	0	0	0	1	2
Q9C0G0	ZNF407	1	0	0	0	1	2
Q9H1I8	ASCC2	1	0	0	0	1	2
Q9NQ31	AKIP1	1	0	0	0	1	2
Q9P253	VPS18	1	0	0	0	1	2
P04908	HIST1H2AE, HIST1H2AB	1	0	0	1	0	2
P38159	RBMX	1	0	0	1	0	2
P63220	RPS21	1	0	0	1	0	2
Q86TI0	TBC1D1	1	0	0	1	0	2
Q9BTM1	H2AFJ	1	0	0	1	0	2
Q96AE4	FUBP1	1	0	0	1	1	3
Q9ULC6	PADI1	1	0	0	1	1	3
P20393	NR1D1	1	0	1	0	0	2
P46013	MKI67	1	0	1	0	0	2
Q69YN4	KIAA1429	1	0	1	0	0	2
Q6S8J3	POTEE	1	0	1	0	0	2
Q99832	CCT7	1	0	1	0	0	2
P60709	ACTB	1	0	1	1	0	3
Q9NZK5	ADA2	1	0	1	1	0	3
O75475	PSIP1	1	0	1	1	1	4
P05141	SLC25A5	1	0	1	1	1	4
P84243	H3F3A, H3F3B	1	0	1	1	1	4
Q8TEK3	DOT1L	1	0	1	1	1	4
Q9HB29	IL1RL2	1	0	1	1	1	4
P15531	NME1	1	1	0	0	0	2
P18124	RPL7	1	1	0	0	0	2
P20794	MAK	1	1	0	0	0	2
P27695	APEX1	1	1	0	0	0	2
P27816	MAP4	1	1	0	0	0	2
P54819	AK2	1	1	0	0	0	2
P62829	RPL23	1	1	0	0	0	2
P68366	TUBA4A	1	1	0	0	0	2
Q03252	LMNB2	1	1	0	0	0	2
Q8IW75	SERPINA12	1	1	0	0	0	2
O14737	PDCD5	1	1	0	0	1	3
O60828	PQBP1	1	1	0	0	1	3
P40227	CCT6A	1	1	0	0	1	3
P43243	MATR3	1	1	0	0	1	3
P83731	RPL24	1	1	0	0	1	3
Q92841	DDX17	1	1	0	0	1	3
Q96J92	WNK4	1	1	0	0	1	3
Q2VIQ3	KIF4B	1	1	0	1	0	3
Q86TB3	ALPK2	1	1	0	1	0	3
Q8WUA8	TSKU	1	1	0	1	1	4
P07737	PFN1	1	1	1	0	0	3
P11940	PABPC1	1	1	1	0	0	3
P31942	HNRNPH3	1	1	1	0	0	3
O43913	ORC5	1	1	1	0	1	4
P00734	F2	1	1	1	0	1	4
P08697	SERPINF2	1	1	1	0	1	4
P31943	HNRNPH1	1	1	1	0	1	4
Q06830	PRDX1	1	1	1	0	1	4
Q13242	SRSF9	1	1	1	0	1	4
Q15637	SF1	1	1	1	0	1	4
Q16629	SRSF7	1	1	1	0	1	4
P02765	AHSG	1	1	1	1	1	5
P19823	ITIH2	1	1	1	1	1	5
P35637	FUS	1	1	1	1	1	5
P42345	MTOR	1	1	1	1	1	5
P53999	SUB1	1	1	1	1	1	5
P67809	YBX1	1	1	1	1	1	5
Q01130	SRSF2	1	1	1	1	1	5
Q3SY00	TSGA10IP	1	1	1	1	1	5
Q96R06	SPAG5	1	1	1	1	1	5
Q99729	HNRNPAB	1	1	1	1	1	5

## Sheet: Annotation
UNIPROT	SYMBOL	GENENAME
A0A087WXM9	MEIKIN	meiotic kinetochore factor
A0A096LP49	CCDC187	coiled-coil domain containing 187
A0AUZ9	KANSL1L	KAT8 regulatory NSL complex subunit 1 like
A1A519	FAM170A	family with sequence similarity 170 member A
A1L020	MEX3A	mex-3 RNA binding family member A
A2RRH5	WDR27	WD repeat domain 27
A3KMH1	VWA8	von Willebrand factor A domain containing 8
A4FU49	SH3D21	SH3 domain containing 21
A4IF30	SLC35F4	solute carrier family 35 member F4
A4UGR9	XIRP2	xin actin binding repeat containing 2
A6NC51	TMEM150B	transmembrane protein 150B
A6NDG6	PGP	phosphoglycolate phosphatase
A6NFY4	NEMP2	nuclear envelope integral membrane protein 2
A6NHR9	SMCHD1	structural maintenance of chromosomes flexible hinge domain containing 1
A6NKB5	PCNX2	pecanex homolog 2 (Drosophila)
A6NL88	SHISA7	shisa family member 7
A7MD48	SRRM4	serine/arginine repetitive matrix 4
A8MTQ0	NOTO	notochord homeobox
A8MTZ7	C12orf71	chromosome 12 open reading frame 71
A8MXT2	MAGEB17	MAGE family member B17
B5MCY1	TDRD15	tudor domain containing 15
D6RGH6	MCIDAS	multiciliate differentiation and DNA synthesis associated cell cycle protein
I3L3R5	CCER2	coiled-coil glutamate rich protein 2
O00151	PDLIM1	PDZ and LIM domain 1
O00217	NDUFS8	NADH:ubiquinone oxidoreductase core subunit S8
O00268	TAF4	TATA-box binding protein associated factor 4
O00308	WWP2	WW domain containing E3 ubiquitin protein ligase 2
O00483	NDUFA4	NDUFA4, mitochondrial complex associated
O00567	NOP56	NOP56 ribonucleoprotein
O00755	WNT7A	Wnt family member 7A
O14523	C2CD2L	C2CD2 like
O14594	NCAN	neurocan
O14682	ENC1	ectodermal-neural cortex 1
O14737	PDCD5	programmed cell death 5
O14745	SLC9A3R1	SLC9A3 regulator 1
O14787	TNPO2	transportin 2
O14920	IKBKB	inhibitor of nuclear factor kappa B kinase subunit beta
O14975	SLC27A2	solute carrier family 27 member 2
O14979	HNRNPDL	heterogeneous nuclear ribonucleoprotein D like
O14983	ATP2A1	ATPase sarcoplasmic/endoplasmic reticulum Ca2+ transporting 1
O15020	SPTBN2	spectrin beta, non-erythrocytic 2
O15056	SYNJ2	synaptojanin 2
O15195	VILL	villin like
O15212	PFDN6	prefoldin subunit 6
O15320	MIA2	melanoma inhibitory activity 2
O15375	SLC16A5	solute carrier family 16 member 5
O43184	ADAM12	ADAM metallopeptidase domain 12
O43194	GPR39	G protein-coupled receptor 39
O43379	WDR62	WD repeat domain 62
O43395	PRPF3	pre-mRNA processing factor 3
O43399	TPD52L2	tumor protein D52 like 2
O43497	CACNA1G	calcium voltage-gated channel subunit alpha1 G
O43526	KCNQ2	potassium voltage-gated channel subfamily Q member 2
O43557	TNFSF14	TNF superfamily member 14
O43776	NARS	asparaginyl-tRNA synthetase
O43847	NRDC	nardilysin convertase
O43896	KIF1C	kinesin family member 1C
O43913	ORC5	origin recognition complex subunit 5
O60220	TIMM8A	translocase of inner mitochondrial membrane 8A
O60237	PPP1R12B	protein phosphatase 1 regulatory subunit 12B
O60268	KIAA0513	KIAA0513
O60292	SIPA1L3	signal induced proliferation associated 1 like 3
O60309	LRRC37A3	leucine rich repeat containing 37 member A3
O60312	ATP10A	ATPase phospholipid transporting 10A (putative)
O60336	MAPKBP1	mitogen-activated protein kinase binding protein 1
O60346	PHLPP1	PH domain and leucine rich repeat protein phosphatase 1
O60437	PPL	periplakin
O60486	PLXNC1	plexin C1
O60506	SYNCRIP	synaptotagmin binding cytoplasmic RNA interacting protein
O60658	PDE8A	phosphodiesterase 8A
O60664	PLIN3	perilipin 3
O60762	DPM1	dolichyl-phosphate mannosyltransferase subunit 1, catalytic
O60814	HIST1H2BK	histone cluster 1 H2B family member k
O60828	PQBP1	polyglutamine binding protein 1
O60858	TRIM13	tripartite motif containing 13
O60894	RAMP1	receptor activity modifying protein 1
O75037	KIF21B	kinesin family member 21B
O75051	PLXNA2	plexin A2
O75096	LRP4	LDL receptor related protein 4
O75106	AOC2	amine oxidase, copper containing 2
O75113	N4BP1	NEDD4 binding protein 1
O75132	ZBED4	zinc finger BED-type containing 4
O75145	PPFIA3	PTPRF interacting protein alpha 3
O75164	KDM4A	lysine demethylase 4A
O75185	ATP2C2	ATPase secretory pathway Ca2+ transporting 2
O75251	NDUFS7	NADH:ubiquinone oxidoreductase core subunit S7
O75330	HMMR	hyaluronan mediated motility receptor
O75347	TBCA	tubulin folding cofactor A
O75366	AVIL	advillin
O75367	H2AFY	H2A histone family member Y
O75369	FLNB	filamin B
O75438	NDUFB1	NADH:ubiquinone oxidoreductase subunit B1
O75475	PSIP1	PC4 and SFRS1 interacting protein 1
O75489	NDUFS3	NADH:ubiquinone oxidoreductase core subunit S3
O75494	SRSF10	serine and arginine rich splicing factor 10
O75531	BANF1	barrier to autointegration factor 1
O75533	SF3B1	splicing factor 3b subunit 1
O75586	MED6	mediator complex subunit 6
O75607	NPM3	nucleophosmin/nucleoplasmin 3
O75643	SNRNP200	small nuclear ribonucleoprotein U5 subunit 200
O75746	SLC25A12	solute carrier family 25 member 12
O75781	PALM	paralemmin
O75843	AP1G2	adaptor related protein complex 1 gamma 2 subunit
O75881	CYP7B1	cytochrome P450 family 7 subfamily B member 1
O75912	DGKI	diacylglycerol kinase iota
O75947	ATP5H	ATP synthase, H+ transporting, mitochondrial Fo complex subunit D
O76003	GLRX3	glutaredoxin 3
O94779	CNTN5	contactin 5
O94832	MYO1D	myosin ID
O94856	NFASC	neurofascin
O94906	PRPF6	pre-mRNA processing factor 6
O94921	CDK14	cyclin dependent kinase 14
O94964	SOGA1	suppressor of glucose, autophagy associated 1
O94966	USP19	ubiquitin specific peptidase 19
O94986	CEP152	centrosomal protein 152
O95073	RAD54B, FSBP	RAD54 homolog B (S. cerevisiae), fibrinogen silencer binding protein
O95219	SNX4	sorting nexin 4
O95405	ZFYVE9	zinc finger FYVE-type containing 9
O95445	APOM	apolipoprotein M
O95613	PCNT	pericentrin
O95777	LSM8	LSM8 homolog, U6 small nuclear RNA associated
O95817	BAG3	BCL2 associated athanogene 3
O95863	SNAI1	snail family transcriptional repressor 1
O96013	PAK4	p21 (RAC1) activated kinase 4
P00338	LDHA	lactate dehydrogenase A
P00505	GOT2	glutamic-oxaloacetic transaminase 2
P00533	EGFR	epidermal growth factor receptor
P00540	MOS	MOS proto-oncogene, serine/threonine kinase
P00734	F2	coagulation factor II, thrombin
P00740	F9	coagulation factor IX
P00918	CA2	carbonic anhydrase 2
P01024	C3	complement C3
P01133	EGF	epidermal growth factor
P01266	TG	thyroglobulin
P02533	KRT14	keratin 14
P02538	KRT6A	keratin 6A
P02545	LMNA	lamin A/C
P02649	APOE	apolipoprotein E
P02656	APOC3	apolipoprotein C3
P02743	APCS	amyloid P component, serum
P02748	C9	complement C9
P02751	FN1	fibronectin 1
P02765	AHSG	alpha 2-HS glycoprotein
P02768	ALB	albumin
P02787	TF	transferrin
P02788	LTF	lactotransferrin
P02790	HPX	hemopexin
P03928	ATP8	ATP synthase F0 subunit 8
P04040	CAT	catalase
P04075	ALDOA	aldolase, fructose-bisphosphate A
P04080	CSTB	cystatin B
P04083	ANXA1	annexin A1
P04181	OAT	ornithine aminotransferase
P04217	A1BG	alpha-1-B glycoprotein
P04350	TUBB4A	tubulin beta 4A class IVa
P04406	GAPDH	glyceraldehyde-3-phosphate dehydrogenase
P04732	MT1E	metallothionein 1E
P04792	HSPB1	heat shock protein family B (small) member 1
P04908	HIST1H2AE, HIST1H2AB	histone cluster 1 H2A family member e, histone cluster 1 H2A family member b
P05141	SLC25A5	solute carrier family 25 member 5
P05164	MPO	myeloperoxidase
P05204	HMGN2	high mobility group nucleosomal binding domain 2
P05386	RPLP1	ribosomal protein lateral stalk subunit P1
P05387	RPLP2	ribosomal protein lateral stalk subunit P2
P05556	ITGB1	integrin subunit beta 1
P05783	KRT18	keratin 18
P05787	KRT8	keratin 8
P06576	ATP5B	ATP synthase, H+ transporting, mitochondrial F1 complex, beta polypeptide
P06733	ENO1	enolase 1
P06744	GPI	glucose-6-phosphate isomerase
P06748	NPM1	nucleophosmin
P06753	TPM3	tropomyosin 3
P07108	DBI	diazepam binding inhibitor, acyl-CoA binding protein
P07195	LDHB	lactate dehydrogenase B
P07196	NEFL	neurofilament light
P07197	NEFM	neurofilament medium
P07237	P4HB	prolyl 4-hydroxylase subunit beta
P07305	H1F0	H1 histone family member 0
P07355	ANXA2	annexin A2
P07437	TUBB	tubulin beta class I
P07476	IVL	involucrin
P07602	PSAP	prosaposin
P07737	PFN1	profilin 1
P07910	HNRNPC	heterogeneous nuclear ribonucleoprotein C (C1/C2)
P08034	GJB1	gap junction protein beta 1
P08172	CHRM2	cholinergic receptor muscarinic 2
P08195	SLC3A2	solute carrier family 3 member 2
P08238	HSP90AB1	heat shock protein 90 alpha family class B member 1
P08582	MELTF	melanotransferrin
P08697	SERPINF2	serpin family F member 2
P08708	RPS17	ribosomal protein S17
P08727	KRT19	keratin 19
P08729	KRT7	keratin 7
P08779	KRT16	keratin 16
P09211	GSTP1	glutathione S-transferase pi 1
P09382	LGALS1	galectin 1
P09429	HMGB1	high mobility group box 1
P09493	TPM1	tropomyosin 1 (alpha)
P09497	CLTB	clathrin light chain B
P09651	HNRNPA1	heterogeneous nuclear ribonucleoprotein A1
P09669	COX6C	cytochrome c oxidase subunit 6C
P09758	TACSTD2	tumor associated calcium signal transducer 2
P09874	PARP1	poly(ADP-ribose) polymerase 1
P09936	UCHL1	ubiquitin C-terminal hydrolase L1
P0C091	FREM3	FRAS1 related extracellular matrix 3
P0C0L5	C4B, C4B_2	complement C4B (Chido blood group), complement component 4B (Chido blood group), copy 2
P0C1H6	H2BFM	H2B histone family member M
P0C869	JMJD7-PLA2G4B, PLA2G4B	JMJD7-PLA2G4B readthrough, phospholipase A2 group IVB
P0CG47	UBB	ubiquitin B
P0CK97	SLC35E2	solute carrier family 35 member E2
P0CW18	PRSS56	protease, serine 56
P0CW27	CCDC166	coiled-coil domain containing 166
P0DMV8	HSPA1A, HSPA1B	heat shock protein family A (Hsp70) member 1A, heat shock protein family A (Hsp70) member 1B
P10074	ZBTB48	zinc finger and BTB domain containing 48
P10243	MYBL1	MYB proto-oncogene like 1
P10412	HIST1H1E	histone cluster 1 H1 family member e
P10599	TXN	thioredoxin
P10606	COX5B	cytochrome c oxidase subunit 5B
P10645	CHGA	chromogranin A
P10809	HSPD1	heat shock protein family D (Hsp60) member 1
P11021	HSPA5	heat shock protein family A (Hsp70) member 5
P11137	MAP2	microtubule associated protein 2
P11142	HSPA8	heat shock protein family A (Hsp70) member 8
P11171	EPB41	erythrocyte membrane protein band 4.1
P11274	BCR	BCR, RhoGEF and GTPase activating protein
P11277	SPTB	spectrin beta, erythrocytic
P11279	LAMP1	lysosomal associated membrane protein 1
P11310	ACADM	acyl-CoA dehydrogenase, C-4 to C-12 straight chain
P11532	DMD	dystrophin
P11586	MTHFD1	methylenetetrahydrofolate dehydrogenase, cyclohydrolase and formyltetrahydrofolate synthetase 1
P11940	PABPC1	poly(A) binding protein cytoplasmic 1
P12111	COL6A3	collagen type VI alpha 3 chain
P12236	SLC25A6	solute carrier family 25 member 6
P12270	TPR	translocated promoter region, nuclear basket protein
P12814	ACTN1	actinin alpha 1
P12830	CDH1	cadherin 1
P12883	MYH7	myosin heavy chain 7
P13611	VCAN	versican
P13637	ATP1A3	ATPase Na+/K+ transporting subunit alpha 3
P13639	EEF2	eukaryotic translation elongation factor 2
P13646	KRT13	keratin 13
P13647	KRT5	keratin 5
P13929	ENO3	enolase 3
P14174	MIF	macrophage migration inhibitory factor (glycosylation-inhibiting factor)
P14314	PRKCSH	protein kinase C substrate 80K-H
P14618	PKM	pyruvate kinase, muscle
P14678	SNRPB	small nuclear ribonucleoprotein polypeptides B and B1
P14854	COX6B1	cytochrome c oxidase subunit 6B1
P14866	HNRNPL	heterogeneous nuclear ribonucleoprotein L
P14927	UQCRB	ubiquinol-cytochrome c reductase binding protein
P15086	CPB1	carboxypeptidase B1
P15311	EZR	ezrin
P15531	NME1	NME/NM23 nucleoside diphosphate kinase 1
P15880	RPS2	ribosomal protein S2
P15918	RAG1	recombination activating 1
P15954	COX7C	cytochrome c oxidase subunit 7C
P16233	PNLIP	pancreatic lipase
P16401	HIST1H1B	histone cluster 1 H1 family member b
P16403	HIST1H1C	histone cluster 1 H1 family member c
P16422	EPCAM	epithelial cell adhesion molecule
P16591	FER	FER tyrosine kinase
P16860	NPPB	natriuretic peptide B
P16949	STMN1	stathmin 1
P16989	YBX3	Y-box binding protein 3
P18065	IGFBP2	insulin like growth factor binding protein 2
P18074	ERCC2	ERCC excision repair 2, TFIIH core complex helicase subunit
P18077	RPL35A	ribosomal protein L35a
P18124	RPL7	ribosomal protein L7
P18206	VCL	vinculin
P18405	SRD5A1	steroid 5 alpha-reductase 1
P18440	NAT1	N-acetyltransferase 1
P18859	ATP5J	ATP synthase, H+ transporting, mitochondrial Fo complex subunit F6
P19012	KRT15	keratin 15
P19338	NCL	nucleolin
P19823	ITIH2	inter-alpha-trypsin inhibitor heavy chain 2
P20393	NR1D1	nuclear receptor subfamily 1 group D member 1
P20674	COX5A	cytochrome c oxidase subunit 5A
P20700	LMNB1	lamin B1
P20794	MAK	male germ cell associated kinase
P20809	IL11	interleukin 11
P20810	CAST	calpastatin
P20933	AGA	aspartylglucosaminidase
P20963	CD247	CD247 molecule
P21333	FLNA	filamin A
P21549	AGXT	alanine-glyoxylate aminotransferase
P22004	BMP6	bone morphogenetic protein 6
P22061	PCMT1	protein-L-isoaspartate (D-aspartate) O-methyltransferase
P22105	TNXB	tenascin XB
P22612	PRKACG	protein kinase cAMP-activated catalytic subunit gamma
P22626	HNRNPA2B1	heterogeneous nuclear ribonucleoprotein A2/B1
P23142	FBLN1	fibulin 1
P23246	SFPQ	splicing factor proline and glutamine rich
P23396	RPS3	ribosomal protein S3
P23526	AHCY	adenosylhomocysteinase
P23527	HIST1H2BO	histone cluster 1 H2B family member o
P23528	CFL1	cofilin 1
P23588	EIF4B	eukaryotic translation initiation factor 4B
P23759	PAX7	paired box 7
P24043	LAMA2	laminin subunit alpha 2
P24298	GPT	glutamic--pyruvic transaminase
P24903	CYP2F1	cytochrome P450 family 2 subfamily F member 1
P25398	RPS12	ribosomal protein S12
P25440	BRD2	bromodomain containing 2
P25705	ATP5A1	ATP synthase, H+ transporting, mitochondrial F1 complex, alpha subunit 1, cardiac muscle
P26038	MSN	moesin
P26373	RPL13	ribosomal protein L13
P26583	HMGB2	high mobility group box 2
P26599	PTBP1	polypyrimidine tract binding protein 1
P26641	EEF1G	eukaryotic translation elongation factor 1 gamma
P27352	GIF	gastric intrinsic factor
P27635	RPL10	ribosomal protein L10
P27695	APEX1	apurinic/apyrimidinic endodeoxyribonuclease 1
P27815	PDE4A	phosphodiesterase 4A
P27816	MAP4	microtubule associated protein 4
P28289	TMOD1	tropomodulin 1
P28290	SSFA2	sperm specific antigen 2
P28476	GABRR2	gamma-aminobutyric acid type A receptor rho2 subunit
P28482	MAPK1	mitogen-activated protein kinase 1
P28562	DUSP1	dual specificity phosphatase 1
P28799	GRN	granulin precursor
P28827	PTPRM	protein tyrosine phosphatase, receptor type M
P29966	MARCKS	myristoylated alanine rich protein kinase C substrate
P30040	ERP29	endoplasmic reticulum protein 29
P30041	PRDX6	peroxiredoxin 6
P30044	PRDX5	peroxiredoxin 5
P30048	PRDX3	peroxiredoxin 3
P30050	RPL12	ribosomal protein L12
P30101	PDIA3	protein disulfide isomerase family A member 3
P30260	CDC27	cell division cycle 27
P30273	FCER1G	Fc fragment of IgE receptor Ig
P30405	PPIF	peptidylprolyl isomerase F
P30520	ADSS	adenylosuccinate synthase
P31937	HIBADH	3-hydroxyisobutyrate dehydrogenase
P31942	HNRNPH3	heterogeneous nuclear ribonucleoprotein H3
P31943	HNRNPH1	heterogeneous nuclear ribonucleoprotein H1
P31947	SFN	stratifin
P31948	STIP1	stress induced phosphoprotein 1
P31949	S100A11	S100 calcium binding protein A11
P32119	PRDX2	peroxiredoxin 2
P33316	DUT	deoxyuridine triphosphatase
P33527	ABCC1	ATP binding cassette subfamily C member 1
P35125	USP6	ubiquitin specific peptidase 6
P35232	PHB	prohibitin
P35251	RFC1	replication factor C subunit 1
P35268	RPL22	ribosomal protein L22
P35579	MYH9	myosin heavy chain 9
P35637	FUS	FUS RNA binding protein
P35900	KRT20	keratin 20
P35916	FLT4	fms related tyrosine kinase 4
P36578	RPL4	ribosomal protein L4
P36955	SERPINF1	serpin family F member 1
P37108	SRP14	signal recognition particle 14
P37802	TAGLN2	transgelin 2
P38159	RBMX	RNA binding motif protein, X-linked
P38646	HSPA9	heat shock protein family A (Hsp70) member 9
P39019	RPS19	ribosomal protein S19
P39023	RPL3	ribosomal protein L3
P39687	ANP32A	acidic nuclear phosphoprotein 32 family member A
P40227	CCT6A	chaperonin containing TCP1 subunit 6A
P40429	RPL13A	ribosomal protein L13a
P40692	MLH1	mutL homolog 1
P40926	MDH2	malate dehydrogenase 2
P41143	OPRD1	opioid receptor delta 1
P41226	UBA7	ubiquitin like modifier activating enzyme 7
P41235	HNF4A	hepatocyte nuclear factor 4 alpha
P42081	CD86	CD86 molecule
P42167	TMPO	thymopoietin
P42263	GRIA3	glutamate ionotropic receptor AMPA type subunit 3
P42345	MTOR	mechanistic target of rapamycin
P42677	RPS27	ribosomal protein S27
P42695	NCAPD3	non-SMC condensin II complex subunit D3
P42766	RPL35	ribosomal protein L35
P43243	MATR3	matrin 3
P45973	CBX5	chromobox 5
P46013	MKI67	marker of proliferation Ki-67
P46060	RANGAP1	Ran GTPase activating protein 1
P46776	RPL27A	ribosomal protein L27a
P46778	RPL21	ribosomal protein L21
P46782	RPS5	ribosomal protein S5
P46783	RPS10	ribosomal protein S10
P46821	MAP1B	microtubule associated protein 1B
P47914	RPL29	ribosomal protein L29
P47929	LGALS7, LGALS7B	galectin 7, galectin 7B
P47985	UQCRFS1	ubiquinol-cytochrome c reductase, Rieske iron-sulfur polypeptide 1
P48539	PCP4	Purkinje cell protein 4
P48728	AMT	aminomethyltransferase
P49207	RPL34	ribosomal protein L34
P49321	NASP	nuclear autoantigenic sperm protein
P49368	CCT3	chaperonin containing TCP1 subunit 3
P49427	CDC34	cell division cycle 34
P49450	CENPA	centromere protein A
P49458	SRP9	signal recognition particle 9
P49641	MAN2A2	mannosidase alpha class 2A member 2
P49747	COMP	cartilage oligomeric matrix protein
P49750	YLPM1	YLP motif containing 1
P49773	HINT1	histidine triad nucleotide binding protein 1
P49792	RANBP2	RAN binding protein 2
P49914	MTHFS	methenyltetrahydrofolate synthetase
P49916	LIG3	DNA ligase 3
P50454	SERPINH1	serpin family H member 1
P50552	VASP	vasodilator-stimulated phosphoprotein
P50914	RPL14	ribosomal protein L14
P51172	SCNN1D	sodium channel epithelial 1 delta subunit
P51553	IDH3G	isocitrate dehydrogenase 3 (NAD(+)) gamma
P51784	USP11	ubiquitin specific peptidase 11
P51812	RPS6KA3	ribosomal protein S6 kinase A3
P51957	NEK4	NIMA related kinase 4
P51970	NDUFA8	NADH:ubiquinone oxidoreductase subunit A8
P51991	HNRNPA3	heterogeneous nuclear ribonucleoprotein A3
P52272	HNRNPM	heterogeneous nuclear ribonucleoprotein M
P52306	RAP1GDS1	Rap1 GTPase-GDP dissociation stimulator 1
P52333	JAK3	Janus kinase 3
P52758	RIDA	reactive intermediate imine deaminase A homolog
P52824	DGKQ	diacylglycerol kinase theta
P52888	THOP1	thimet oligopeptidase 1
P52907	CAPZA1	capping actin protein of muscle Z-line alpha subunit 1
P52926	HMGA2	high mobility group AT-hook 2
P53999	SUB1	SUB1 homolog, transcriptional regulator
P54198	HIRA	histone cell cycle regulator
P54274	TERF1	telomeric repeat binding factor 1
P54577	YARS	tyrosyl-tRNA synthetase
P54819	AK2	adenylate kinase 2
P55036	PSMD4	proteasome 26S subunit, non-ATPase 4
P55145	MANF	mesencephalic astrocyte derived neurotrophic factor
P55265	ADAR	adenosine deaminase, RNA specific
P55809	OXCT1	3-oxoacid CoA-transferase 1
P55957	BID	BH3 interacting domain death agonist
P57053	LOC102724334	histone H2B type F-S-like
P58876	HIST1H2BD	histone cluster 1 H2B family member d
P60174	TPI1	triosephosphate isomerase 1
P60412	KRTAP10-11	keratin associated protein 10-11
P60660	MYL6	myosin light chain 6
P60709	ACTB	actin beta
P60866	RPS20	ribosomal protein S20
P61011	SRP54	signal recognition particle 54
P61224	RAP1B	RAP1B, member of RAS oncogene family
P61254	RPL26	ribosomal protein L26
P61313	RPL15	ribosomal protein L15
P61599	NAA20	N(alpha)-acetyltransferase 20, NatB catalytic subunit
P61604	HSPE1	heat shock protein family E (Hsp10) member 1
P61927	RPL37	ribosomal protein L37
P61978	HNRNPK	heterogeneous nuclear ribonucleoprotein K
P62081	RPS7	ribosomal protein S7
P62241	RPS8	ribosomal protein S8
P62249	RPS16	ribosomal protein S16
P62263	RPS14	ribosomal protein S14
P62269	RPS18	ribosomal protein S18
P62273	RPS29	ribosomal protein S29
P62280	RPS11	ribosomal protein S11
P62316	SNRPD2	small nuclear ribonucleoprotein D2 polypeptide
P62424	RPL7A	ribosomal protein L7a
P62750	RPL23A	ribosomal protein L23a
P62805	HIST1H4I, HIST1H4A, HIST1H4D, HIST1H4F, HIST1H4K, HIST1H4J, HIST1H4C, HIST1H4H, HIST1H4B, HIST1H4E, HIST1H4L, HIST2H4A, HIST4H4, HIST2H4B	histone cluster 1 H4 family member i, histone cluster 1 H4 family member a, histone cluster 1 H4 family member d, histone cluster 1 H4 family member f, histone cluster 1 H4 family member k, histone cluster 1 H4 family member j, histone cluster 1 H4 family member c, histone cluster 1 H4 family member h, histone cluster 1 H4 family member b, histone cluster 1 H4 family member e, histone cluster 1 H…
P62807	HIST1H2BD, HIST1H2BG, HIST1H2BF, HIST1H2BE, HIST1H2BI, HIST1H2BC	histone cluster 1 H2B family member d, histone cluster 1 H2B family member g, histone cluster 1 H2B family member f, histone cluster 1 H2B family member e, histone cluster 1 H2B family member i, histone cluster 1 H2B family member c
P62829	RPL23	ribosomal protein L23
P62847	RPS24	ribosomal protein S24
P62851	RPS25	ribosomal protein S25
P62857	RPS28	ribosomal protein S28
P62888	RPL30	ribosomal protein L30
P62899	RPL31	ribosomal protein L31
P62917	RPL8	ribosomal protein L8
P62937	PPIA	peptidylprolyl isomerase A
P62987	UBA52	ubiquitin A-52 residue ribosomal protein fusion product 1
P63104	YWHAZ	tyrosine 3-monooxygenase/tryptophan 5-monooxygenase activation protein zeta
P63220	RPS21	ribosomal protein S21
P63261	ACTG1	actin gamma 1
P67809	YBX1	Y-box binding protein 1
P67812	SEC11A	SEC11 homolog A, signal peptidase complex subunit
P68104	EEF1A1	eukaryotic translation elongation factor 1 alpha 1
P68363	TUBA1B	tubulin alpha 1b
P68366	TUBA4A	tubulin alpha 4a
P68371	TUBB4B	tubulin beta 4B class IVb
P68402	PAFAH1B2	platelet activating factor acetylhydrolase 1b catalytic subunit 2
P68871	HBB	hemoglobin subunit beta
P69905	HBA1, HBA2	hemoglobin subunit alpha 1, hemoglobin subunit alpha 2
P78318	IGBP1	immunoglobulin binding protein 1
P78347	GTF2I	general transcription factor IIi
P78560	CRADD	CASP2 and RIPK1 domain containing adaptor with death domain
P80303	NUCB2	nucleobindin 2
P82094	TMF1	TATA element modulatory factor 1
P82914	MRPS15	mitochondrial ribosomal protein S15
P82979	SARNP	SAP domain containing ribonucleoprotein
P83731	RPL24	ribosomal protein L24
P83881	RPL36A	ribosomal protein L36a
P84090	ERH	enhancer of rudimentary homolog (Drosophila)
P84098	RPL19	ribosomal protein L19
P84103	SRSF3	serine and arginine rich splicing factor 3
P84243	H3F3A, H3F3B	H3 histone family member 3A, H3 histone family member 3B
P98095	FBLN2	fibulin 2
P98161	PKD1	polycystin 1, transient receptor potential channel interacting
P98179	RBM3	RNA binding motif (RNP1, RRM) protein 3
Q00056	HOXA4	homeobox A4
Q00059	TFAM	transcription factor A, mitochondrial
Q00325	SLC25A3	solute carrier family 25 member 3
Q00688	FKBP3	FK506 binding protein 3
Q00839	HNRNPU	heterogeneous nuclear ribonucleoprotein U
Q01082	SPTBN1	spectrin beta, non-erythrocytic 1
Q01101	INSM1	INSM transcriptional repressor 1
Q01130	SRSF2	serine and arginine rich splicing factor 2
Q01664	TFAP4	transcription factor AP-4
Q01844	EWSR1	EWS RNA binding protein 1
Q01954	BNC1	basonuclin 1
Q02539	HIST1H1A	histone cluster 1 H1 family member a
Q02543	RPL18A	ribosomal protein L18a
Q02878	RPL6	ribosomal protein L6
Q02952	AKAP12	A-kinase anchoring protein 12
Q03154	ACY1	aminoacylase 1
Q03252	LMNB2	lamin B2
Q03468	ERCC6	ERCC excision repair 6, chromatin remodeling factor
Q03518	TAP1	transporter 1, ATP binding cassette subfamily B member
Q04695	KRT17	keratin 17
Q04721	NOTCH2	notch 2
Q04756	HGFAC	HGF activator
Q05682	CALD1	caldesmon 1
Q06323	PSME1	proteasome activator subunit 1
Q06418	TYRO3	TYRO3 protein tyrosine kinase
Q06830	PRDX1	peroxiredoxin 1
Q07020	RPL18	ribosomal protein L18
Q07021	C1QBP	complement C1q binding protein
Q07352	ZFP36L1	ZFP36 ring finger protein like 1
Q07666	KHDRBS1	KH RNA binding domain containing, signal transduction associated 1
Q07955	SRSF1	serine and arginine rich splicing factor 1
Q08209	PPP3CA	protein phosphatase 3 catalytic subunit alpha
Q08211	DHX9	DExH-box helicase 9
Q08828	ADCY1	adenylate cyclase 1
Q0P6D6	CCDC15	coiled-coil domain containing 15
Q0VAA5	PLCXD2	phosphatidylinositol specific phospholipase C X domain containing 2
Q0ZLH3	DFNB59	deafness, autosomal recessive 59
Q12772	SREBF2	sterol regulatory element binding transcription factor 2
Q12789	GTF3C1	general transcription factor IIIC subunit 1
Q12802	AKAP13	A-kinase anchoring protein 13
Q12830	BPTF	bromodomain PHD finger transcription factor
Q12912	LRMP	lymphoid restricted membrane protein
Q12913	PTPRJ	protein tyrosine phosphatase, receptor type J
Q13045	FLII	FLII, actin remodeling protein
Q13148	TARDBP	TAR DNA binding protein
Q13162	PRDX4	peroxiredoxin 4
Q13185	CBX3	chromobox 3
Q13242	SRSF9	serine and arginine rich splicing factor 9
Q13243	SRSF5	serine and arginine rich splicing factor 5
Q13257	MAD2L1	mitotic arrest deficient 2 like 1
Q13263	TRIM28	tripartite motif containing 28
Q13283	G3BP1	G3BP stress granule assembly factor 1
Q13285	NR5A1	nuclear receptor subfamily 5 group A member 1
Q13287	NMI	N-myc and STAT interactor
Q13428	TCOF1	treacle ribosome biogenesis factor 1
Q13435	SF3B2	splicing factor 3b subunit 2
Q13495	MAMLD1	mastermind like domain containing 1
Q13561	DCTN2	dynactin subunit 2
Q13573	SNW1	SNW domain containing 1
Q13591	SEMA5A	semaphorin 5A
Q13637	RAB32	RAB32, member RAS oncogene family
Q13671	RIN1	Ras and Rab interactor 1
Q13740	ALCAM	activated leukocyte cell adhesion molecule
Q13753	LAMC2	laminin subunit gamma 2
Q13813	SPTAN1	spectrin alpha, non-erythrocytic 1
Q13838	DDX39B	DExD-box helicase 39B
Q13946	PDE7A	phosphodiesterase 7A
Q13976	PRKG1	protein kinase, cGMP-dependent, type I
Q14011	CIRBP	cold inducible RNA binding protein
Q14103	HNRNPD	heterogeneous nuclear ribonucleoprotein D
Q14134	TRIM29	tripartite motif containing 29
Q14142	TRIM14	tripartite motif containing 14
Q14154	KIAA0141	KIAA0141
Q14289	PTK2B	protein tyrosine kinase 2 beta
Q14324	MYBPC2	myosin binding protein C, fast type
Q14562	DHX8	DEAH-box helicase 8
Q14571	ITPR2	inositol 1,4,5-trisphosphate receptor type 2
Q14651	PLS1	plastin 1
Q14676	MDC1	mediator of DNA damage checkpoint 1
Q14683	SMC1A	structural maintenance of chromosomes 1A
Q14686	NCOA6	nuclear receptor coactivator 6
Q14690	PDCD11	programmed cell death 11
Q14697	GANAB	glucosidase II alpha subunit
Q14790	CASP8	caspase 8
Q14978	NOLC1	nucleolar and coiled-body phosphoprotein 1
Q14980	NUMA1	nuclear mitotic apparatus protein 1
Q149M9	NWD1	NACHT and WD repeat domain containing 1
Q14C86	GAPVD1	GTPase activating protein and VPS9 domains 1
Q15014	MORF4L2	mortality factor 4 like 2
Q15049	MLC1	megalencephalic leukoencephalopathy with subcortical cysts 1
Q15056	EIF4H	eukaryotic translation initiation factor 4H
Q15070	OXA1L	OXA1L, mitochondrial inner membrane protein
Q15084	PDIA6	protein disulfide isomerase family A member 6
Q15102	PAFAH1B3	platelet activating factor acetylhydrolase 1b catalytic subunit 3
Q15181	PPA1	pyrophosphatase (inorganic) 1
Q15185	PTGES3	prostaglandin E synthase 3
Q15233	NONO	non-POU domain containing, octamer-binding
Q15276	RABEP1	rabaptin, RAB GTPase binding effector protein 1
Q15293	RCN1	reticulocalbin 1
Q15349	RPS6KA2	ribosomal protein S6 kinase A2
Q15365	PCBP1	poly(rC) binding protein 1
Q15366	PCBP2	poly(rC) binding protein 2
Q15424	SAFB	scaffold attachment factor B
Q15437	SEC23B	Sec23 homolog B, coat complex II component
Q15459	SF3A1	splicing factor 3a subunit 1
Q15545	TAF7	TATA-box binding protein associated factor 7
Q15569	TESK1	testis-specific kinase 1
Q15637	SF1	splicing factor 1
Q15651	HMGN3	high mobility group nucleosomal binding domain 3
Q15717	ELAVL1	ELAV like RNA binding protein 1
Q15723	ELF2	E74 like ETS transcription factor 2
Q15843	NEDD8	neural precursor cell expressed, developmentally down-regulated 8
Q16204	CCDC6	coiled-coil domain containing 6
Q16236	NFE2L2	nuclear factor, erythroid 2 like 2
Q16629	SRSF7	serine and arginine rich splicing factor 7
Q16643	DBN1	drebrin 1
Q16773	KYAT1	kynurenine aminotransferase 1
Q16778	HIST2H2BE	histone cluster 2 H2B family member e
Q16836	HADH	hydroxyacyl-CoA dehydrogenase
Q17RY0	CPEB4	cytoplasmic polyadenylation element binding protein 4
Q1KMD3	HNRNPUL2	heterogeneous nuclear ribonucleoprotein U like 2
Q1MX18	INSC	inscuteable homolog (Drosophila)
Q2M389	WASHC4	WASH complex subunit 4
Q2M3C6	TMEM266	transmembrane protein 266
Q2M3W8	ZNF181	zinc finger protein 181
Q2NKQ1	SGSM1	small G protein signaling modulator 1
Q2TAC6	KIF19	kinesin family member 19
Q2VIQ3	KIF4B	kinesin family member 4B
Q32P41	TRMT5	tRNA methyltransferase 5
Q38SD2	LRRK1	leucine rich repeat kinase 1
Q3SY00	TSGA10IP	testis specific 10 interacting protein
Q3V6T2	CCDC88A	coiled-coil domain containing 88A
Q494U1	PLEKHN1	pleckstrin homology domain containing N1
Q49A88	CCDC14	coiled-coil domain containing 14
Q49A92	C8orf34	chromosome 8 open reading frame 34
Q49AM1	MTERF2	mitochondrial transcription termination factor 2
Q4G0J3	LARP7	La ribonucleoprotein domain family member 7
Q4L180	FILIP1L	filamin A interacting protein 1 like
Q4L235	AASDH	aminoadipate-semialdehyde dehydrogenase
Q504Q3	PAN2	PAN2 poly(A) specific ribonuclease subunit
Q53T59	HS1BP3	HCLS1 binding protein 3
Q569K6	CCDC157	coiled-coil domain containing 157
Q58A45	PAN3	PAN3 poly(A) specific ribonuclease subunit
Q5HY64	FAM47C	family with sequence similarity 47 member C
Q5HYA8	TMEM67	transmembrane protein 67
Q5JQF8	PABPC1L2A, PABPC1L2B	poly(A) binding protein cytoplasmic 1 like 2A, poly(A) binding protein cytoplasmic 1 like 2B
Q5JR98	TCTEX1D4	Tctex1 domain containing 4
Q5JS13	RALGPS1	Ral GEF with PH domain and SH3 binding motif 1
Q5JSH3	WDR44	WD repeat domain 44
Q5JTW2	CEP78	centrosomal protein 78
Q5M9N0	CCDC158	coiled-coil domain containing 158
Q5QNW6	HIST2H2BF	histone cluster 2 H2B family member f
Q5RHP9	ERICH3	glutamate rich 3
Q5SSJ5	HP1BP3	heterochromatin protein 1 binding protein 3
Q5SWH9	TMEM69	transmembrane protein 69
Q5T0F9	CC2D1B	coiled-coil and C2 domain containing 1B
Q5T5P2	KIAA1217	KIAA1217
Q5T8R8	C9orf66	chromosome 9 open reading frame 66
Q5TC82	RC3H1	ring finger and CCCH-type domains 1
Q5THK1	PRR14L	proline rich 14 like
Q5UIP0	RIF1	replication timing regulatory factor 1
Q5VU43	PDE4DIP, LOC653513	phosphodiesterase 4D interacting protein, phosphodiesterase 4D interacting protein-like
Q5VU69	C1orf189	chromosome 1 open reading frame 189
Q5VUA4	ZNF318	zinc finger protein 318
Q5VWI1	TCERG1L	transcription elongation regulator 1 like
Q5VXT5	SYPL2	synaptophysin like 2
Q5VYV7	SLX4IP	SLX4 interacting protein
Q5VZF2	MBNL2	muscleblind like splicing regulator 2
Q66GS9	CEP135	centrosomal protein 135
Q66K14	TBC1D9B	TBC1 domain family member 9B
Q685J3	MUC17	mucin 17, cell surface associated
Q69YN4	KIAA1429	KIAA1429
Q6E0U4	DMKN	dermokine
Q6EEV6	SUMO4	small ubiquitin-like modifier 4
Q6EMK4	VASN	vasorin
Q6GMV2	SMYD5	SMYD family member 5
Q6IQ23	PLEKHA7	pleckstrin homology domain containing A7
Q6IQ55	TTBK2	tau tubulin kinase 2
Q6IS14	EIF5AL1	eukaryotic translation initiation factor 5A-like 1
Q6IS24	WBSCR17	Williams-Beuren syndrome chromosome region 17
Q6KCM7	SLC25A25	solute carrier family 25 member 25
Q6L9W6	B4GALNT3	beta-1,4-N-acetyl-galactosaminyltransferase 3
Q6N043	ZNF280D	zinc finger protein 280D
Q6NSX1	CCDC70	coiled-coil domain containing 70
Q6NXT2	H3F3C	H3 histone family member 3C
Q6NY19	KANK3	KN motif and ankyrin repeat domains 3
Q6NZI2	CAVIN1	caveolae associated protein 1
Q6P0Q8	MAST2	microtubule associated serine/threonine kinase 2
Q6P1X5	TAF2	TATA-box binding protein associated factor 2
Q6P2Q9	PRPF8	pre-mRNA processing factor 8
Q6P3R8	NEK5	NIMA related kinase 5
Q6P4F7	ARHGAP11A	Rho GTPase activating protein 11A
Q6P9H5	GIMAP6	GTPase, IMAP family member 6
Q6PEW1	ZCCHC12	zinc finger CCHC-type containing 12
Q6PIW4	FIGNL1	fidgetin like 1
Q6PJP8	DCLRE1A	DNA cross-link repair 1A
Q6PK81	ZNF773	zinc finger protein 773
Q6PL18	ATAD2	ATPase family, AAA domain containing 2
Q6S8J3	POTEE	POTE ankyrin domain family member E
Q6TGC4	PADI6	peptidyl arginine deiminase 6
Q6UWL2	SUSD1	sushi domain containing 1
Q6WCQ1	MPRIP	myosin phosphatase Rho interacting protein
Q6ZMJ2	SCARA5	scavenger receptor class A member 5
Q6ZMK1	CYHR1	cysteine and histidine rich 1
Q6ZMM2	ADAMTSL5	ADAMTS like 5
Q6ZN28	MACC1	MACC1, MET transcriptional regulator
Q6ZQW0	IDO2	indoleamine 2,3-dioxygenase 2
Q6ZRI0	OTOG	otogelin
Q6ZRI8	ARHGAP36	Rho GTPase activating protein 36
Q6ZT07	TBC1D9	TBC1 domain family member 9
Q6ZUA9	MROH5	maestro heat like repeat family member 5
Q6ZVH7	ESPNL	espin-like
Q6ZWE6	PLEKHM3	pleckstrin homology domain containing M3
Q70CQ1	USP49	ubiquitin specific peptidase 49
Q70Z35	PREX2	phosphatidylinositol-3,4,5-trisphosphate dependent Rac exchange factor 2
Q70Z53	FRA10AC1	FRA10A associated CGG repeat 1
Q71U36	TUBA1A	tubulin alpha 1a
Q76B58	BRINP3	BMP/retinoic acid inducible neural specific 3
Q76KP1	B4GALNT4	beta-1,4-N-acetyl-galactosaminyltransferase 4
Q76L83	ASXL2	additional sex combs like 2, transcriptional regulator
Q7L273	KCTD9	potassium channel tetramerization domain containing 9
Q7L5Y1	ENOSF1	enolase superfamily member 1
Q7L7L0	HIST3H2A	histone cluster 3 H2A
Q7Z3V4	UBE3B	ubiquitin protein ligase E3B
Q7Z444	ERAS	ES cell expressed Ras
Q7Z4W1	DCXR	dicarbonyl and L-xylulose reductase
Q7Z5M5	TMC3	transmembrane channel like 3
Q7Z5N4	SDK1	sidekick cell adhesion molecule 1
Q7Z614	SNX20	sorting nexin 20
Q7Z628	NET1	neuroepithelial cell transforming 1
Q7Z6Z7	HUWE1	HECT, UBA and WWE domain containing 1, E3 ubiquitin protein ligase
Q7Z7F0	KIAA0907	KIAA0907
Q7Z7K6	CENPV	centromere protein V
Q86SX6	GLRX5	glutaredoxin 5
Q86TB3	ALPK2	alpha kinase 2
Q86TI0	TBC1D1	TBC1 domain family member 1
Q86U28	ISCA2	iron-sulfur cluster assembly 2
Q86U90	YRDC	yrdC N6-threonylcarbamoyltransferase domain containing
Q86UK0	ABCA12	ATP binding cassette subfamily A member 12
Q86UK5	EVC2	EvC ciliary complex subunit 2
Q86UP3	ZFHX4	zinc finger homeobox 4
Q86V15	CASZ1	castor zinc finger 1
Q86V48	LUZP1	leucine zipper protein 1
Q86V81	ALYREF	Aly/REF export factor
Q86VH5	LRRTM3	leucine rich repeat transmembrane neuronal 3
Q86WR0	CCDC25	coiled-coil domain containing 25
Q86YA3	ZGRF1	zinc finger GRF-type containing 1
Q86YV5	PRAG1	PEAK1 related kinase activating pseudokinase 1
Q86Z20	CCDC125	coiled-coil domain containing 125
Q8IU54	IFNL1	interferon lambda 1
Q8IU68	TMC8	transmembrane channel like 8
Q8IUB2	WFDC3	WAP four-disulfide core domain 3
Q8IUE6	HIST2H2AB	histone cluster 2 H2A family member b
Q8IV45	UNC5CL	unc-5 family C-terminal like
Q8IVE3	PLEKHH2	pleckstrin homology, MyTH4 and FERM domain containing H2
Q8IVF5	TIAM2	T-cell lymphoma invasion and metastasis 2
Q8IW36	ZNF695	zinc finger protein 695
Q8IW75	SERPINA12	serpin family A member 12
Q8IWA5	SLC44A2	solute carrier family 44 member 2
Q8IWI9	MGA	MGA, MAX dimerization protein
Q8IX12	CCAR1	cell division cycle and apoptosis regulator 1
Q8IX21	SLF2	SMC5-SMC6 complex localization factor 2
Q8IXJ9	ASXL1	additional sex combs like 1, transcriptional regulator
Q8IXW0	LMNTD2	lamin tail domain containing 2
Q8IY81	FTSJ3	FtsJ homolog 3
Q8IYF3	TEX11	testis expressed 11
Q8IYT8	ULK2	unc-51 like autophagy activating kinase 2
Q8IYX4	DND1	DND microRNA-mediated repression inhibitor 1
Q8IYX8	CEP57L1	centrosomal protein 57 like 1
Q8IZF6	ADGRG4	adhesion G protein-coupled receptor G4
Q8IZT6	ASPM	abnormal spindle microtubule assembly
Q8J025	APCDD1	APC down-regulated 1
Q8N0U8	VKORC1L1	vitamin K epoxide reductase complex subunit 1 like 1
Q8N163	CCAR2	cell cycle and apoptosis regulator 2
Q8N336	ELMOD1	ELMO domain containing 1
Q8N370	SLC43A2	solute carrier family 43 member 2
Q8N4H5	TOMM5	translocase of outer mitochondrial membrane 5
Q8N4L1	TMEM151A	transmembrane protein 151A
Q8N5C6	SRBD1	S1 RNA binding domain 1
Q8N690	DEFB119	defensin beta 119
Q8N697	SLC15A4	solute carrier family 15 member 4
Q8N6G5	CSGALNACT2	chondroitin sulfate N-acetylgalactosaminyltransferase 2
Q8N6N3	C1orf52	chromosome 1 open reading frame 52
Q8N6T3	ARFGAP1	ADP ribosylation factor GTPase activating protein 1
Q8N8V4	ANKS4B	ankyrin repeat and sterile alpha motif domain containing 4B
Q8N9N2	ASCC1	activating signal cointegrator 1 complex subunit 1
Q8N9P6	C9orf163	chromosome 9 open reading frame 163
Q8N9V3	WDSUB1	WD repeat, sterile alpha motif and U-box domain containing 1
Q8N9V7	TOPAZ1	testis and ovary specific PAZ domain containing 1
Q8N9W8	FAM71D	family with sequence similarity 71 member D
Q8NB49	ATP11C	ATPase phospholipid transporting 11C
Q8NBP7	PCSK9	proprotein convertase subtilisin/kexin type 9
Q8NBR6	MINDY2	MINDY lysine 48 deubiquitinase 2
Q8NBS9	TXNDC5	thioredoxin domain containing 5
Q8NC42	RNF149	ring finger protein 149
Q8NC51	SERBP1	SERPINE1 mRNA binding protein 1
Q8NC60	NOA1	nitric oxide associated 1
Q8NC74	RBBP8NL	RBBP8 N-terminal like
Q8NCR0	B3GALNT2	beta-1,3-N-acetylgalactosaminyltransferase 2
Q8NCT3	KIAA0895	KIAA0895
Q8ND07	BBOF1	basal body orientation factor 1
Q8ND56	LSM14A	LSM14A, mRNA processing body assembly factor
Q8NDZ0	BEND2	BEN domain containing 2
Q8NEP4	C17orf47	chromosome 17 open reading frame 47
Q8NF99	ZNF397	zinc finger protein 397
Q8NFH8	REPS2	RALBP1 associated Eps domain containing 2
Q8NFR9	IL17RE	interleukin 17 receptor E
Q8NG92	OR13H1	olfactory receptor family 13 subfamily H member 1
Q8NHA4	OR2AE1	olfactory receptor family 2 subfamily AE member 1
Q8NI99	ANGPTL6	angiopoietin like 6
Q8TAF3	WDR48	WD repeat domain 48
Q8TAK6	OLIG1	oligodendrocyte transcription factor 1
Q8TB92	HMGCLL1	3-hydroxymethyl-3-methylglutaryl-CoA lyase like 1
Q8TBM8	DNAJB14	DnaJ heat shock protein family (Hsp40) member B14
Q8TBY9	WDR66	WD repeat domain 66
Q8TC26	TMEM163	transmembrane protein 163
Q8TC44	POC1B	POC1 centriolar protein B
Q8TC92	ENOX1	ecto-NOX disulfide-thiol exchanger 1
Q8TCA0	LRRC20	leucine rich repeat containing 20
Q8TCG1	KIAA1524	KIAA1524
Q8TCY9	URGCP	upregulator of cell proliferation
Q8TD16	BICD2	BICD cargo adaptor 2
Q8TD57	DNAH3	dynein axonemal heavy chain 3
Q8TD84	DSCAML1	DS cell adhesion molecule like 1
Q8TDX9	PKD1L1	polycystin 1 like 1, transient receptor potential channel interacting
Q8TE58	ADAMTS15	ADAM metallopeptidase with thrombospondin type 1 motif 15
Q8TEB1	DCAF11	DDB1 and CUL4 associated factor 11
Q8TEK3	DOT1L	DOT1 like histone lysine methyltransferase
Q8TER5	ARHGEF40	Rho guanine nucleotide exchange factor 40
Q8TF61	FBXO41	F-box protein 41
Q8WTW3	COG1	component of oligomeric golgi complex 1
Q8WUA8	TSKU	tsukushi, small leucine rich proteoglycan
Q8WUQ7	CACTIN	cactin, spliceosome C complex subunit
Q8WUZ0	BCL7C	BCL tumor suppressor 7C
Q8WV41	SNX33	sorting nexin 33
Q8WV93	AFG1L	AFG1 like ATPase
Q8WVH0	CPLX3	complexin 3
Q8WVK2	SNRNP27	small nuclear ribonucleoprotein U4/U6.U5 subunit 27
Q8WWI1	LMO7	LIM domain 7
Q8WWN8	ARAP3	ArfGAP with RhoGAP domain, ankyrin repeat and PH domain 3
Q8WWR8	NEU4	neuraminidase 4
Q8WXE0	CASKIN2	CASK interacting protein 2
Q8WXF0	SRSF12	serine and arginine rich splicing factor 12
Q8WXI3	ASB10	ankyrin repeat and SOCS box containing 10
Q92485	SMPDL3B	sphingomyelin phosphodiesterase acid like 3B
Q92504	SLC39A7	solute carrier family 39 member 7
Q92522	H1FX	H1 histone family member X
Q92543	SNX19	sorting nexin 19
Q92616	GCN1	GCN1, eIF2 alpha kinase activator homolog
Q92625	ANKS1A	ankyrin repeat and sterile alpha motif domain containing 1A
Q92673	SORL1	sortilin related receptor 1
Q92734	TFG	TRK-fused gene
Q92772	CDKL2	cyclin dependent kinase like 2
Q92791	P3H4	prolyl 3-hydroxylase family member 4 (non-enzymatic)
Q92817	EVPL	envoplakin
Q92835	INPP5D	inositol polyphosphate-5-phosphatase D
Q92841	DDX17	DEAD-box helicase 17
Q92917	GPKOW	G-patch domain and KOW motifs
Q92945	KHSRP	KH-type splicing regulatory protein
Q93008	USP9X	ubiquitin specific peptidase 9, X-linked
Q93034	CUL5	cullin 5
Q93070	ART4	ADP-ribosyltransferase 4 (Dombrock blood group)
Q93077	HIST1H2AC	histone cluster 1 H2A family member c
Q93079	HIST1H2BH	histone cluster 1 H2B family member h
Q969M2	GJA10	gap junction protein alpha 10
Q969T3	SNX21	sorting nexin family member 21
Q96A00	PPP1R14A	protein phosphatase 1 regulatory inhibitor subunit 14A
Q96AC6	KIFC2	kinesin family member C2
Q96AE4	FUBP1	far upstream element binding protein 1
Q96AG4	LRRC59	leucine rich repeat containing 59
Q96C19	EFHD2	EF-hand domain family member D2
Q96CB9	NSUN4	NOP2/Sun RNA methyltransferase family member 4
Q96CN5	LRRC45	leucine rich repeat containing 45
Q96D53	COQ8B	coenzyme Q8B
Q96DR7	ARHGEF26	Rho guanine nucleotide exchange factor 26
Q96DZ5	CLIP3	CAP-Gly domain containing linker protein 3
Q96E39	RBMXL1	RNA binding motif protein, X-linked like 1
Q96EP5	DAZAP1	DAZ associated protein 1
Q96FK6	WDR89	WD repeat domain 89
Q96I24	FUBP3	far upstream element binding protein 3
Q96IC2	LOC81691	exonuclease NEF-sp
Q96ID5	IGSF21	immunoglobin superfamily member 21
Q96J02	ITCH	itchy E3 ubiquitin protein ligase
Q96J84	KIRREL	kin of IRRE like (Drosophila)
Q96J92	WNK4	WNK lysine deficient protein kinase 4
Q96K76	USP47	ubiquitin specific peptidase 47
Q96KK5	HIST1H2AH	histone cluster 1 H2A family member h
Q96KQ7	EHMT2	euchromatic histone lysine methyltransferase 2
Q96KR7	PHACTR3	phosphatase and actin regulator 3
Q96L91	EP400	E1A binding protein p400
Q96L96	ALPK3	alpha kinase 3
Q96MN2	NLRP4	NLR family pyrin domain containing 4
Q96MP8	KCTD7	potassium channel tetramerization domain containing 7
Q96MR6	CFAP57	cilia and flagella associated protein 57
Q96MV1	TMEM56	transmembrane protein 56
Q96N66	MBOAT7	membrane bound O-acyltransferase domain containing 7
Q96NA8	TSNARE1	t-SNARE domain containing 1
Q96NL0	RUNDC3B	RUN domain containing 3B
Q96PC3	AP1S3	adaptor related protein complex 1 sigma 3 subunit
Q96PK6	RBM14, RBM14-RBM4	RNA binding motif protein 14, RBM14-RBM4 readthrough
Q96PU4	UHRF2	ubiquitin like with PHD and ring finger domains 2
Q96PY6	NEK1	NIMA related kinase 1
Q96Q05	TRAPPC9	trafficking protein particle complex 9
Q96QI5	HS3ST6	heparan sulfate-glucosamine 3-sulfotransferase 6
Q96R06	SPAG5	sperm associated antigen 5
Q96RY7	IFT140	intraflagellar transport 140
Q96S55	WRNIP1	Werner helicase interacting protein 1
Q96SE0	ABHD1	abhydrolase domain containing 1
Q96T17	MAP7D2	MAP7 domain containing 2
Q96T68	SETDB2	SET domain bifurcated 2
Q96TA1	FAM129B	family with sequence similarity 129 member B
Q99426	TBCB	tubulin folding cofactor B
Q99497	PARK7	Parkinsonism associated deglycase
Q99549	MPHOSPH8	M-phase phosphoprotein 8
Q99570	PIK3R4	phosphoinositide-3-kinase regulatory subunit 4
Q99575	POP1	POP1 homolog, ribonuclease P/MRP subunit
Q99614	TTC1	tetratricopeptide repeat domain 1
Q99698	LYST	lysosomal trafficking regulator
Q99719	SEPT5	septin 5
Q99729	HNRNPAB	heterogeneous nuclear ribonucleoprotein A/B
Q99832	CCT7	chaperonin containing TCP1 subunit 7
Q99848	EBNA1BP2	EBNA1 binding protein 2
Q99877	HIST1H2BN	histone cluster 1 H2B family member n
Q99878	HIST1H2AJ	histone cluster 1 H2A family member j
Q99973	TEP1	telomerase associated protein 1
Q99996	AKAP9	A-kinase anchoring protein 9
Q9BPU6	DPYSL5	dihydropyrimidinase like 5
Q9BPW5	RASL11B	RAS like family 11 member B
Q9BQE3	TUBA1C	tubulin alpha 1c
Q9BQJ4	TMEM47	transmembrane protein 47
Q9BRF8	CPPED1	calcineurin like phosphoesterase domain containing 1
Q9BRP0	OVOL2	ovo like zinc finger 2
Q9BRR8	GPATCH1	G-patch domain containing 1
Q9BSG1	ZNF2	zinc finger protein 2
Q9BSJ6	PIMREG	PICALM interacting mitotic regulator
Q9BSV6	TSEN34	tRNA splicing endonuclease subunit 34
Q9BTM1	H2AFJ	H2A histone family member J
Q9BU76	C1orf35	chromosome 1 open reading frame 35
Q9BUJ2	HNRNPUL1	heterogeneous nuclear ribonucleoprotein U like 1
Q9BV73	CEP250	centrosomal protein 250
Q9BVA1	TUBB2B	tubulin beta 2B class IIb
Q9BW27	NUP85	nucleoporin 85
Q9BWL3	C1orf43	chromosome 1 open reading frame 43
Q9BX63	BRIP1	BRCA1 interacting protein C-terminal helicase 1
Q9BX68	HINT2	histidine triad nucleotide binding protein 2
Q9BXP5	SRRT	serrate, RNA effector molecule
Q9BXT5	TEX15	testis expressed 15, meiosis and synapsis associated
Q9BY07	SLC4A5	solute carrier family 4 member 5
Q9BYB0	SHANK3	SH3 and multiple ankyrin repeat domains 3
Q9BZF3	OSBPL6	oxysterol binding protein like 6
Q9BZH6	WDR11	WD repeat domain 11
Q9BZR6	RTN4R	reticulon 4 receptor
Q9C005	DPY30	dpy-30, histone methyltransferase complex regulatory subunit
Q9C010	PKIB	cAMP-dependent protein kinase inhibitor beta
Q9C0A0	CNTNAP4	contactin associated protein like 4
Q9C0G0	ZNF407	zinc finger protein 407
Q9GZT3	SLIRP	SRA stem-loop interacting RNA binding protein
Q9GZY8	MFF	mitochondrial fission factor
Q9H0B3	KIAA1683	KIAA1683
Q9H0C2	SLC25A31	solute carrier family 25 member 31
Q9H0C8	ILKAP	ILK associated serine/threonine phosphatase
Q9H0J9	PARP12	poly(ADP-ribose) polymerase family member 12
Q9H0R4	HDHD2	haloacid dehalogenase like hydrolase domain containing 2
Q9H0W5	CCDC8	coiled-coil domain containing 8
Q9H1I8	ASCC2	activating signal cointegrator 1 complex subunit 2
Q9H1K4	SLC25A18	solute carrier family 25 member 18
Q9H251	CDH23	cadherin related 23
Q9H254	SPTBN4	spectrin beta, non-erythrocytic 4
Q9H257	CARD9	caspase recruitment domain family member 9
Q9H269	VPS16	VPS16, CORVET/HOPS core subunit
Q9H293	IL25	interleukin 25
Q9H299	SH3BGRL3	SH3 domain binding glutamate rich protein like 3
Q9H2G4	TSPYL2	TSPY like 2
Q9H2T7	RANBP17	RAN binding protein 17
Q9H361	PABPC3	poly(A) binding protein cytoplasmic 3
Q9H3K6	BOLA2, BOLA2B, LOC107984053	bolA family member 2, bolA family member 2B, bolA-like protein 2
Q9H3N1	TMX1	thioredoxin related transmembrane protein 1
Q9H3Y6	SRMS	src-related kinase lacking C-terminal regulatory tyrosine and N-terminal myristylation sites
Q9H488	POFUT1	protein O-fucosyltransferase 1
Q9H4L4	SENP3	SUMO1/sentrin/SMT3 specific peptidase 3
Q9H4L7	SMARCAD1	SWI/SNF-related, matrix-associated actin-dependent regulator of chromatin, subfamily a, containing DEAD/H box 1
Q9H5I5	PIEZO2	piezo type mechanosensitive ion channel component 2
Q9H607	OCEL1	occludin/ELL domain containing 1
Q9H773	DCTPP1	dCTP pyrophosphatase 1
Q9H792	PEAK1	pseudopodium enriched atypical kinase 1
Q9H8T0	AKTIP	AKT interacting protein
Q9H8Y1	VRTN	vertebrae development associated
Q9H910	JPT2	Jupiter microtubule associated homolog 2
Q9H9Y2	RPF1	ribosome production factor 1 homolog
Q9HA90	EFCC1	EF-hand and coiled-coil domain containing 1
Q9HB29	IL1RL2	interleukin 1 receptor like 2
Q9HBE5	IL21R	interleukin 21 receptor
Q9HBR0	SLC38A10	solute carrier family 38 member 10
Q9HBV2	SPACA1	sperm acrosome associated 1
Q9HCD6	TANC2	tetratricopeptide repeat, ankyrin repeat and coiled-coil containing 2
Q9HCE1	MOV10	Mov10 RISC complex RNA helicase
Q9HCG8	CWC22	CWC22 spliceosome associated protein homolog
Q9HCK1	ZDBF2	zinc finger DBF-type containing 2
Q9HCM3	KIAA1549	KIAA1549
Q9HCR9	PDE11A	phosphodiesterase 11A
Q9HCS5	EPB41L4A	erythrocyte membrane protein band 4.1 like 4A
Q9HCY8	S100A14	S100 calcium binding protein A14
Q9NPA8	ENY2	ENY2, transcription and export complex 2 subunit
Q9NQ31	AKIP1	A-kinase interacting protein 1
Q9NQS1	AVEN	apoptosis and caspase activation inhibitor
Q9NR64	KLHL1	kelch like family member 1
Q9NR82	KCNQ5	potassium voltage-gated channel subfamily Q member 5
Q9NR96	TLR9	toll like receptor 9
Q9NR99	MXRA5	matrix remodeling associated 5
Q9NRC6	SPTBN5	spectrin beta, non-erythrocytic 5
Q9NRE1	MMP26	matrix metallopeptidase 26
Q9NRK6	ABCB10	ATP binding cassette subfamily B member 10
Q9NRL2	BAZ1A	bromodomain adjacent to zinc finger domain 1A
Q9NS62	THSD1	thrombospondin type 1 domain containing 1
Q9NS84	CHST7	carbohydrate sulfotransferase 7
Q9NSB2	KRT84	keratin 84
Q9NSG2	C1orf112	chromosome 1 open reading frame 112
Q9NTN3	SLC35D1	solute carrier family 35 member D1
Q9NU23	LYRM2	LYR motif containing 2
Q9NUZ1	ACOXL	acyl-CoA oxidase like
Q9NV79	PCMTD2	protein-L-isoaspartate (D-aspartate) O-methyltransferase domain containing 2
Q9NVV4	MTPAP	mitochondrial poly(A) polymerase
Q9NW68	BSDC1	BSD domain containing 1
Q9NWB1	RBFOX1	RNA binding protein, fox-1 homolog 1
Q9NWZ5	UCKL1	uridine-cytidine kinase 1 like 1
Q9NY26	SLC39A1	solute carrier family 39 member 1
Q9NYF8	BCLAF1	BCL2 associated transcription factor 1
Q9NYL9	TMOD3	tropomodulin 3
Q9NYU2	UGGT1	UDP-glucose glycoprotein glucosyltransferase 1
Q9NYY8	FASTKD2	FAST kinase domains 2
Q9NYZ2	SLC25A37	solute carrier family 25 member 37
Q9NZB2	FAM120A	family with sequence similarity 120A
Q9NZB8	MOCS1	molybdenum cofactor synthesis 1
Q9NZK5	ADA2	adenosine deaminase 2
Q9NZL9	MAT2B	methionine adenosyltransferase 2B
Q9NZS2	KLRF1	killer cell lectin like receptor F1
Q9P227	ARHGAP23	Rho GTPase activating protein 23
Q9P253	VPS18	VPS18, CORVET/HOPS core subunit
Q9P2A4	ABI3	ABI family member 3
Q9P2F8	SIPA1L2	signal induced proliferation associated 1 like 2
Q9P2K2	TXNDC16	thioredoxin domain containing 16
Q9UBG7	RBPJL	recombination signal binding protein for immunoglobulin kappa J region like
Q9UBT2	UBA2	ubiquitin like modifier activating enzyme 2
Q9UBY9	HSPB7	heat shock protein family B (small) member 7
Q9UHB6	LIMA1	LIM domain and actin binding 1
Q9UHD8	SEPT9	septin 9
Q9UHF0	TAC3	tachykinin 3
Q9UHI6	DDX20	DEAD-box helicase 20
Q9UIF9	BAZ2A	bromodomain adjacent to zinc finger domain 2A
Q9UIQ6	LNPEP	leucyl and cystinyl aminopeptidase
Q9UIW2	PLXNA1	plexin A1
Q9UJA3	MCM8	minichromosome maintenance 8 homologous recombination repair factor
Q9UJS0	SLC25A13	solute carrier family 25 member 13
Q9UKM9	RALY	RALY heterogeneous nuclear ribonucleoprotein
Q9UKP4	ADAMTS7	ADAM metallopeptidase with thrombospondin type 1 motif 7
Q9UKT7	FBXL3	F-box and leucine rich repeat protein 3
Q9UKU0	ACSL6	acyl-CoA synthetase long-chain family member 6
Q9UKV3	ACIN1	apoptotic chromatin condensation inducer 1
Q9UKW4	VAV3	vav guanine nucleotide exchange factor 3
Q9ULC6	PADI1	peptidyl arginine deiminase 1
Q9ULD4	BRPF3	bromodomain and PHD finger containing 3
Q9ULH0	KIDINS220	kinase D interacting substrate 220
Q9UM63	PLAGL1	PLAG1 like zinc finger 1
Q9UM73	ALK	ALK receptor tyrosine kinase
Q9UMF0	ICAM5	intercellular adhesion molecule 5
Q9UMZ2	SYNRG	synergin gamma
Q9UNA0	ADAMTS5	ADAM metallopeptidase with thrombospondin type 1 motif 5
Q9UNH6	SNX7	sorting nexin 7
Q9UNX3	RPL26L1	ribosomal protein L26 like 1
Q9UNZ2	NSFL1C	NSFL1 cofactor
Q9UPN6	SCAF8	SR-related CTD associated factor 8
Q9UPP1	PHF8	PHD finger protein 8
Q9UPS8	ANKRD26	ankyrin repeat domain 26
Q9UPX0	IGSF9B	immunoglobulin superfamily member 9B
Q9UQ16	DNM3	dynamin 3
Q9UQ26	RIMS2	regulating synaptic membrane exocytosis 2
Q9UQ35	SRRM2	serine/arginine repetitive matrix 2
Q9UQB8	BAIAP2	BAI1 associated protein 2
Q9UQE7	SMC3	structural maintenance of chromosomes 3
Q9Y247	FAM50B	family with sequence similarity 50 member B
Q9Y259	CHKB	choline kinase beta
Q9Y266	NUDC	nuclear distribution C, dynein complex regulator
Q9Y278	HS3ST2	heparan sulfate-glucosamine 3-sulfotransferase 2
Q9Y287	ITM2B	integral membrane protein 2B
Q9Y2G9	SBNO2	strawberry notch homolog 2
Q9Y2H9	MAST1	microtubule associated serine/threonine kinase 1
Q9Y2K5	R3HDM2	R3H domain containing 2
Q9Y2K9	STXBP5L	syntaxin binding protein 5 like
Q9Y2R4	DDX52	DExD-box helicase 52
Q9Y2V2	CARHSP1	calcium regulated heat stable protein 1
Q9Y2W1	THRAP3	thyroid hormone receptor associated protein 3
Q9Y2W2	WBP11	WW domain binding protein 11
Q9Y2Z9	COQ6	coenzyme Q6, monooxygenase
Q9Y385	UBE2J1	ubiquitin conjugating enzyme E2 J1
Q9Y3I0	RTCB	RNA 2',3'-cyclic phosphate and 5'-OH ligase
Q9Y3U8	RPL36	ribosomal protein L36
Q9Y485	DMXL1	Dmx like 1
Q9Y4A5	TRRAP	transformation/transcription domain associated protein
Q9Y4B5	MTCL1	microtubule crosslinking factor 1
Q9Y4F9	RIPOR2	RHO family interacting cell polarization regulator 2
Q9Y4H2	IRS2	insulin receptor substrate 2
Q9Y4W6	AFG3L2	AFG3 like matrix AAA peptidase subunit 2
Q9Y592	CEP83	centrosomal protein 83
Q9Y5B6	PAXBP1	PAX3 and PAX7 binding protein 1
Q9Y5L4	TIMM13	translocase of inner mitochondrial membrane 13
Q9Y5Q5	CORIN	corin, serine peptidase
Q9Y5R6	DMRT1	doublesex and mab-3 related transcription factor 1
Q9Y5Y5	PEX16	peroxisomal biogenesis factor 16
Q9Y676	MRPS18B	mitochondrial ribosomal protein S18B
Q9Y6C2	EMILIN1	elastin microfibril interfacer 1
Q9Y6E0	STK24	serine/threonine kinase 24
Q9Y6E2	BZW2	basic leucine zipper and W2 domains 2
Q9Y6F9	WNT6	Wnt family member 6
Q9Y6H1	CHCHD2	coiled-coil-helix-coiled-coil-helix domain containing 2
Q9Y6J0	CABIN1	calcineurin binding protein 1
Q9Y6Q2	STON1, STON1-GTF2A1L	stonin 1, STON1-GTF2A1L readthrough
Q9Y6Y1	CAMTA1	calmodulin binding transcription activator 1
